# Supplementary material
Source: publisher site journal article supplement (https://www.spandidos-publications.com/4650/downloadSupplementary)
Supplement: Supplementary file 2 [file downloadSupplementary]

## Sheet: Supplemental Table 3
Table SIII. SRPBM expression value of each circRNA for all liver tissue samples in a mouse model.
circular RNA ID	PZH_1	PZH_2	PZH_3	PZH_4	PZH_5	PZH_6	Control_1	Control_2	Control_3	Control_4	Control_5	Control_6
10:105303594|105323637	0	1.2746	0	0	1.53829	0.830548	0	0	1.56822	0	0	0
10:105321396|105323637	1.36124	1.24946	0	2.17231	0	0	0	0.720278	1.56927	0	0	4.95663
10:105321396|105348549	0	0	0	0	0	0	0	0	0	1.33366	0	0
10:105413217|105413787	0	0	0	0	3.4574	2.06239	7.64511	1.43816	9.20476	0	2.4204	4.33842
10:105823160|105826591	0	1.83382	0	0	0	0	0	0	0	2.79428	0	0
10:106962962|106988909	0	0	0	0	0	0	0	0	0	0	0	1.41774
10:107023654|107053516	0	0	0	0	0	0	1.26037	0	5.92842	0	0	2.94817
10:107023654|107084951	1.02348	0	0	0	0	0	0	0	0	0	0	0
10:107045213|107053483	0	0	0	0	0	0	0	0	0.943023	0	0	0
10:107045213|107053516	5.15718	4.57186	3.80951	1.55269	4.35152	4.76573	2.2148	3.03614	2.98198	4.32184	7.82841	5.80644
10:107045213|107084951	2.43587	0	0	0	0	3.66166	0	1.43936	2.89034	0	0	3.22667
10:107380080|107382713	0	0	0	0	0	0	0	0	1.25458	0	0	0
10:108198833|108214506	0	0	1.14366	0	0	1.00201	0	0	1.56822	0	0	0
10:108198833|108234143	0	0	0	0	0	0	0	0	0	0	1.75221	0
10:108230437|108234143	0	0	0	1.41244	0	0	0	0	0	0	0	0
10:108230437|108240179	0	1.52476	0	0	0	0	0	0	0	0	0	0
10:108240105|108241278	0	0	0	0.930991	1.53829	0	1.57285	0	0	0	0	0
10:108240105|108243130	3.19614	10.3604	3.03863	4.62726	2.08213	1.33151	0	6.11457	8.64128	5.82176	4.1802	5.01664
10:108240105|108251008	2.04016	0	4.55443	5.30133	1.55125	3.38876	1.8982	2.87632	0	0	4.71411	0
10:108240105|108253495	0	0	0	0	1.89948	0	0	0	0	0	0	0
10:108264703|108269358	1.18841	0	0	0	0	0	0	0	0	0	1.01981	0
10:108264703|108271769	0	0	0	0	0.924001	0	0	0	0	0	0	0
10:108264703|108274188	0	0	0	0	0	0	0	0	0	3.36232	2.39098	0
10:108268572|108274188	8.56579	8.32638	15.671	8.94115	17.4039	16.9477	10.14	7.85943	27.9136	12.123	11.0267	15.8472
10:108271722|108274188	0	0	0	0	0	0	0	0	0	0.822131	0	0
10:108409463|108412068	0	0	0.6437	0	0	0	0	1.46641	0	0	0	0
10:111204735|111233690	0	0	0	0	0	0	0	0	1.88291	0	0	0
10:111224672|111233690	0	0	0	0	0	0	3.05059	1.52058	0	0	0	0
10:111246061|111255758	0	0	0	0	0	0	0	1.4418	0	0	0	0
10:111273026|111277343	0	0.612967	0	0	0	2.45954	1.25828	0	2.51124	0	0	0
10:11178734|11185462	2.04244	0	0	1.55269	1.23166	1.66439	0	0	0	1.99212	0	0
10:115229125|115233258	0	0	0	0	0	2.67426	1.76586	0	0	0	0	2.82832
10:115233120|115239346	0	0	0	0	0	0	0	0	0	2.71199	0	0
10:115294871|115302791	0	0	0	1.04252	0	2.19687	0	0	0	3.88329	0	0
10:115390650|115398069	0	0	0	0	0	0	0.638747	0	0	0	0	0
10:115403200|115406562	0	0	0	0	0	0	2.83428	0	0	0	0	0
10:115406353|115406898	0	6.56192	3.56434	2.48893	4.50295	2.33015	5.22711	0	4.38161	3.6891	3.79926	2.73558
10:115411720|115415739	0	0	0	0	0	0	0.671712	0	0	0	0	0
10:115423384|115427146	0	0	0	0	0.616343	0	0	0	0	0	0	0
10:115423384|115427502	0	0	0.872661	0	0	0	0	0	0	0	0	0
10:116317366|116319602	0	1.79138	0	0.620661	0	0	3.1543	0	0	0	0	0
10:116349966|116361307	0	1.65644	0	0	0	0	0	0	0.630467	0	0	0
10:116352706|116361307	0	0.915873	0	0	0	0	0	0	0	0	0	0
10:116353791|116361307	0	0	2.89183	0	0	1.06806	0	2.53562	3.15233	0	2.55658	0
10:116363279|116369459	0	0	0	0	0.922976	0	0	0	0	0	0	0
10:116492292|116507188	0	1.22083	0	0	0	0	0	0	0	0	0	0
10:116498086|116499466	0	0	0	0	0	0	0	0	4.59627	0	0	0
10:116501192|116517383	0	0	0	0	0.922976	0	0	0	0	0	0	0
10:116504035|116507188	0.689565	0	0	0	2.15669	0	0	2.15964	0	0	0	0.866853
10:116517317|116527949	1.42757	0	0	0	0	0	1.25828	0	0	0	1.88484	1.33143
10:116517317|116537278	0	0	0	1.48183	0	0	0	0	0	0.998274	0	0
10:116517317|116549105	13.1488	15.4054	23.9978	23.8448	10.1608	16.2666	13.2865	12.6496	14.8478	14.6057	13.438	17.4855
10:116517317|116549175	38.3114	29.1615	33.0473	18.1577	36.0459	28.2932	32.1098	21.716	24.2915	30.6521	24.9138	20.3009
10:116527827|116549105	1.70013	4.99983	3.9706	0.983916	4.61694	6.72794	5.11823	4.15049	9.8149	4.4591	7.07187	2.4098
10:116527827|116549175	6.20452	13.1105	4.1977	5.28191	5.1515	9.74094	3.15207	6.06608	12.0081	6.07986	5.86419	4.05673
10:116910125|116939481	0	0	0	0	0	0	0	0	0	0	0.876591	0
10:116928189|116939481	0	0	0	0	0	0	0	0	0	3.24134	0.875618	0
10:116937397|116939481	5.5889	1.22083	5.11762	7.27451	7.93966	6.69538	5.55579	0	3.88745	6.1731	4.26904	5.25992
10:117355935|117360555	0	1.70628	0	0	0	0	0	0	0	1.38136	0	0
10:117355935|117360951	0	0	1.35209	0.980957	0	1.00769	0	0	0	0	1.2161	0
10:117355935|117367988	0	2.44889	3.91526	5.91423	0	5.06694	0	2.89897	5.83188	0	1.88553	0
10:117366081|117367988	15.0306	21.6247	17.1646	15.2562	0	11.3759	17.6038	6.59906	17.2209	20.7673	13.9641	14.4656
10:117692582|117695068	31.5781	18.5347	29.6144	41.9726	24.8444	26.708	25.1579	29.0743	34.9529	38.6071	32.0901	23.0769
10:117692582|117705229	0	0	5.02899	3.61726	0	0	2.91199	0	0	0	0	0
10:117694905|117705229	0	0	0	0	0	0	1.28177	0	0	0	0	1.06299
10:117696381|117705229	0	0	0.6437	0	0	0	0	0	0	0	0	0
10:117701565|117702335	0	0	0	0	0	0	2.3269	0	0	0	2.40417	0
10:117701565|117705229	0	10.1369	8.87022	7.22072	0	9.50189	9.47988	6.03587	14.0735	10.5913	14.5997	15.3628
10:117777129|117777664	0	0	0	0	7.57637	9.08916	0	2.5429	0	0	0	0
10:117784995|117787911	2.26116	0	0	0	0	0	1.02497	2.07327	2.51547	0	1.87216	0
10:117817344|117818609	2.80762	4.52164	5.30876	2.52201	8.42587	0	2.51655	1.82835	4.0271	3.03533	5.58826	3.64972
10:117820462|117822869	2.27696	0	0	0	5.03329	0	2.5176	1.45047	0	7.11812	0	0
10:120089408|120092688	1.36124	1.21981	0	1.55691	0	1.00886	0	0	0	0	5.33861	0
10:120145646|120146629	0	0	0	0	0	0	0	0	0	0	0.586703	0
10:120176231|120182708	0	0	0	0	0	0	0	0	0	0.99606	0	0
10:120825108|120852092	0	31.2714	0	36.536	30.8171	0	0	40.0834	28.4103	0	0	25.2405
10:120843411|120852048	0	1.60736	0	0	0	0	0	0	0	0	0	0
10:120849976|120852092	0	0	0	0	0	2.75174	0	0	5.03498	0	1.71291	0
10:120849976|120871151	0	0	0	0	0	0	0	0	0.628333	0	0	0
10:120925767|120933709	0	0	0	0	0	0	0	0	0	0	0	2.82832
10:120947204|120949363	0	0	0	0	0	0	0	0	0	0	0	1.97267
10:120947204|120952255	19.0005	0	0	0	39.6262	0	31.3608	28.4653	42.5381	29.1476	29.3231	20.6558
10:120949297|120952255	0	0	0	0	0	0	0.747039	0	1.26093	0	0	0
10:121294589|121304471	0	0	0	0.964307	0	0	0	0	0	0	0	0
10:121371144|121376734	0	0	1.83815	0.930991	4.27428	1.33373	2.20731	3.05089	0	1.66568	0	0
10:121371144|121383443	0	0	1.28526	0	0	0	0	0	0	0	0	0
10:121374358|121383443	0	0	0	0	0	0	0	0	0	1.6601	0	0
10:121551251|121551593	0	0	0	3.76338	0	0	0	0	0	0	0	0
10:121552200|121553068	0	7.10817	0	0	6.35832	15.5741	0	0	15.0112	20.1381	0	6.23082
10:121561577|121570791	0	0	0	0	0.646757	0	0	0	1.79413	0	0	0
10:121568029|121570791	0	4.94313	0	0	0	2.47278	5.14668	0.720278	1.63495	3.80227	6.74101	1.17484
10:121596184|121602420	0	0	0	0	0	0	0	0	0	0	0	2.31467
10:121611476|121613671	0	0	0	0	0.922976	0	0	0	0	0	0	0
10:121613223|121615223	0	1.22083	0	0	0	0	0	0	0	0	0	0
10:121619093|121622991	0	0	0	1.0318	0	0	0	0	1.88291	0	0	0
10:121869717|121870510	0.714801	0	0.645886	0	0.615317	0	0	0	2.83452	0	0	0
10:121925816|121931509	3.45143	6.17985	10.186	0	8.94436	9.90576	1.7022	0	7.02276	7.82865	6.84346	0
10:122088879|122096094	0	0.921038	0	0	0	0	0	0	0	0	0	0
10:122401249|122404435	0	0	0	0.930991	0	0	0	0	0	0	0	0
10:122430750|122431325	2.04016	0	5.99891	3.44453	6.7681	3.04313	6.23088	0	13.4757	10.2108	7.93012	4.40375
10:122782183|122811559	0	0	0	0	0	0	0	0	1.06179	0	0	0
10:122904092|122920845	3.18926	0	2.40492	0.620661	7.43279	0	0	3.73196	0	1.67356	0	0
10:123006972|123015139	0	0	0	0	0	0	0	0	0	0.684648	0	0
10:123014941|123016556	0	0	0	0	0	2.99701	0	0	0	0	0	1.7584
10:123022834|123024011	1.70013	0	0	0	0	0	0	0	0	0	0	0
10:123124964|123125927	0	0	0	1.24236	0	0	0	0	0	0	0	0
10:123125413|123125927	0	0	0	0	0	0	0	0	0	0	0	0.719342
10:123130941|123133129	0	3.3792	0	0	0	0	0	0	0	0	0	0
10:123130941|123146938	0	0	0	0	0	0	5.33595	3.57096	0	1.79867	0	0
10:123132956|123146938	0	0	0	0	0	0	0	0	0	0	3.12851	0
10:123146794|123153127	0	0	3.01973	0	0	0	0	0	0	0	0	0
10:123146794|123181800	0	1.22392	0	0	0	0	0	0	0	1.85595	0	2.08771
10:123163593|123181800	0	0	1.28633	0	1.23811	0	0	6.21998	2.17301	0	4.97658	0
10:123168227|123181800	0.723382	0	2.58368	1.24236	0	1.99838	0	0	2.16158	2.44086	2.38997	0
10:123704359|123705824	0	0	0	0	0	0	1.23901	0	0	0	0	0
10:12413936|12455564	0	0	0	0	0	0	0	0	0	1.03541	0	0
10:12436281|12448092	0	0	0.655925	0	0	0	0	4.67402	3.49311	0	1.783	0
10:12436281|12455564	7.77486	9.13496	11.4501	14.2657	10.6996	12.8583	11.1728	6.91174	8.21122	8.93915	12.3812	8.2806
10:12439627|12448092	0	0	0	0	0.616343	0	0	0	0	0	0	0
10:12439627|12455564	0	0	2.91195	0	0.616343	0	0	0.722724	0	0	1.75419	0.71189
10:12475271|12486654	0	0	0	0	0	0	0	0	0	0	0	0.717878
10:12525338|12538213	0	0	0	2.21538	0	0	4.40607	0	3.23884	1.05268	0.583745	0
10:125294595|125302081	2.10892	0.915873	1.62694	1.86302	0	1.6655	0	0	0	5.64877	0	1.1146
10:125298622|125302081	0	0	0.642629	0	0	0	0	0	0	0	0	0
10:125339139|125341850	2.00283	2.67174	1.13164	0	0	0	0	0	0	0	0	0
10:125994418|126000160	0	0	0.686116	1.33885	0	0	0	0	0	0	0	0
10:12621191|12654834	0	0	1.28526	0	0	0	0	0	0	0	0	0
10:12633944|12643611	0	0	0	0	0	1.01213	0	0	0	0	0.59266	0
10:12633944|12654834	0	0	0	0.930991	0	0	0	0	1.88291	0	0	0
10:12636596|12641044	0	0	0	0	0	1.92617	0	0	0	0	0	0
10:12640927|12654834	0	0	0	0.620661	0	0	0	0	0	0	0	0
10:12660779|12663538	0	0	1.38221	3.68165	0	0	1.88742	0	1.91141	2.32751	0	0
10:12697989|12699115	0	0	0	0	0	0	0	4.31937	0	0	1.46034	0.71189
10:126991531|126993908	0	0	1.60657	0	0	0	0	0	2.1976	0	0	0
10:127028365|127029682	0	3.05583	0	0	0	0	0	0	3.3504	1.32919	1.23427	2.47478
10:12709966|12711583	0	1.83073	0	0	0	0	0	0	0	0	0	0
10:127119403|127120545	0	0	1.61634	0	0	0	0	0	0	0	1.75521	0
10:12713254|12727912	0	2.33224	0	4.20225	0	1.87322	3.41786	0	2.09549	1.33481	0	1.07024
10:127166718|127167542	0	0	0	0	0	0	0	1.08102	0	0	0	0
10:127176572|127177169	0	1.52782	0	0	0	0	0	0	0.995086	0	0	1.41652
10:12720018|12720942	0	2.1367	0	0	0	0	2.61414	0	5.70184	1.75328	0	0
10:127274714|127278408	0	0.953544	0	0	0	0	1.57285	0	2.8368	0	0	0
10:127275824|127277938	0	0	1.60764	0	0	0	0	0	0	0	0	0
10:127275824|127278408	0	0	2.27199	0	1.6277	0	0.944757	0	1.88186	0	0	1.42015
10:127390311|127400193	14.5735	0	10.2651	0	15.0857	0	0	0	19.644	12.2187	14.2437	0
10:127390311|127444475	0	0	3.1437	0	0	0	0	0	0	1.38408	3.53999	0
10:127483976|127485570	0	0	0	0.623778	0	0	0	0	0	0	0	0
10:127541234|127542673	0	0	0	1.25607	0	0	0	0	0	0	0	0
10:127646891|127648189	0	7.84845	6.4209	5.39305	1.23063	1.59468	5.65129	3.75317	6.71858	3.04658	2.33595	0
10:128068786|128069214	0	0	0	0	0	0	1.89058	0	0	0	0	0
10:128137474|128138197	0	0	0	0	0	0	0.954514	0	0	0	0	0
10:128199182|128201369	0	0	0	0	0	0	0	0	0	0	1.75319	0
10:128201206|128205264	0.680054	3.35652	2.25243	4.34529	1.2462	2.23718	3.79837	0	1.35594	0.99606	3.92438	0
10:128206872|128207622	1.02236	2.9102	0	0	0	0	1.79192	0.720278	0	0	0	0
10:128207298|128208667	41.7284	58.7895	53.3956	66.8681	40.6006	70.3675	61.46	77.2119	86.2038	59.4049	68.3744	42.0749
10:128207301|128208667	0	0	0	0	0	1.3384	0	0	0	0	0	0
10:128242310|128242718	0	4.20477	0	3.41923	3.30863	0	0	0	0	0	2.15256	0
10:128276486|128277218	2.04016	0	0	0	0	0	0.629139	0	0	0	0	0
10:128276486|128278817	0	0	0	0	1.53932	1.99838	2.2908	0	2.42005	0	0	0
10:128277644|128278817	4.78421	5.56513	5.813	3.95877	5.25527	9.24315	7.2458	0	7.8321	5.46876	9.09969	3.94462
10:128277822|128278817	0	0	0	0	0	0	0	0	1.25458	0	0	0
10:128358334|128358533	0	0	0.963944	0	3.70438	0	2.54232	0	0	0	0	0
10:128462981|128465506	0	0	0	0	1.88862	2.29759	0	0	0	0	0	0
10:128468795|128469137	0	0	1.6328	0	0	0	0	0	0	0	0	0
10:128468795|128469789	7.82068	4.76679	1.92896	7.7006	4.94574	6.71768	0	6.98448	8.84539	3.71683	9.87937	3.64036
10:128468795|128475064	0	0	0	0	0	0	0	0	0	0	0.583745	0
10:128474201|128475064	0	1.83798	2.57373	0	0	0	0	1.07862	0	0	0	3.90329
10:128562827|128563705	0	0	0.642629	0	0	0	0	0	0	1.44773	0	2.83601
10:128575982|128577294	0	0	0	1.24132	0	2.09657	0	0	0	0	0	0
10:128575982|128579092	0	0	0	0	0	0	0.943708	0	0	0	1.45936	0
10:128578100|128579092	2.09815	0	2.8308	0	0	0	1.5739	2.16088	2.82384	0.791974	1.75318	2.67142
10:128579496|128582103	0	7.79175	3.85895	1.02227	0	1.04083	1.8683	2.76205	3.20705	0	0	0.70708
10:128729599|128730259	0	0	0	0	0	0	0.663951	0	1.47307	0	0	0
10:128814038|128814685	0	0	0	0	0	0	0	0	0	0	5.21373	0
10:13224784|13234211	2.04129	4.07418	0	0	0	0	0	0	0	0	0	0
10:13224784|13239965	0.731966	0	0	0	0	0	0	0	0	0	0.659146	1.0618
10:13232539|13239965	0	0	0	0	0	0	0	0	0	0	0	0.70708
10:13239910|13247195	0	0	0	0	0	1.56334	0	0	0	0	0	0
10:14004201|14011215	0	0	2.33883	0	2.27169	0	0	0	0	0	0	0
10:14004201|14066680	0	0	0.972614	0	0	0	0	0	0	0	0	0
10:14004201|14066684	14.9864	0	15.0656	0	10.5569	0	0	0	0	14.2171	24.0476	19.6894
10:14032304|14066684	0	0	0	0	0	0	0	0	0	2.31717	0.94206	0.770606
10:14684064|14687708	0	0	0	0	0	0	0	0	0	0	1.75419	0
10:18089448|18096336	4.11091	5.49223	5.12797	1.86302	1.85319	4.74164	5.03839	0	6.18836	6.97463	8.18844	2.83563
10:18092845|18094908	8.59639	3.9326	0	1.69867	1.92759	6.22051	4.72169	0	6.86119	10.5031	4.30385	4.38699
10:18092845|18096336	0	1.65756	0	0	1.84907	0	0	0	0	0	1.50587	0
10:18472919|18498157	0	0	4.31584	2.81971	1.99924	0	0	0	0	0	0	0
10:19006863|19011790	0	1.22184	0	0	0	0	0	0	0	0	0	0
10:19884778|19894802	3.75611	0	7.39238	1.24132	1.53829	6.8871	1.26039	0	0	2.67534	0	0
10:19884778|19905902	0	1.52476	0	0	0	0.666866	0	0	0	0	0	0
10:19887060|19894802	0	0	0	0	0	0	0	0	0	1.32919	0	0
10:20000566|20029203	0	0	1.60657	0	0	0	0	0	0	0	0	0
10:20000566|20059090	0	0	1.28526	0	0	0	0	0	0	0	0	0
10:20023608|20029203	0	0	0	3.55496	2.46545	0	0	0	0	0	0	0
10:20023608|20067936	0	0	0	0	0	0	0	0	0	0	0	0.805951
10:20023608|20082468	0	0	0	0	0	2.01097	0	0	0	0	0	0
10:20046372|20082468	0	0	0	0	0	0	0	2.51678	0	0	0	0
10:20056475|20067936	0	0	0	0	0	0	0	0	0	2.19488	0	0
10:20058937|20079337	0	0	0	0	0	0	1.95539	0	0	0	0	0
10:20067829|20079337	0	0	1.28526	0	0.621683	0	0	0	0	0	0	1.84231
10:20067829|20082468	7.34798	10.6972	7.89325	6.72761	11.2931	11.1085	5.16522	6.60901	12.2437	3.65333	5.81374	10.0359
10:20067829|20094495	0	0	0	0	0	2.35814	0	0	0	0	0	0
10:20067829|20100197	0	0	0	0	0	2.0085	0	0	0	0	0	0
10:20076482|20082468	4.15864	0	4.96449	3.79388	1.75933	5.93016	3.24061	5.79143	3.01387	7.75064	6.72259	0
10:20099505|20100197	0	0	0	0	3.80988	0	1.40044	0	0	0	0	0
10:20118145|20118583	2.10628	3.06537	0	2.04909	0.925041	3.7585	0	3.03015	0.941977	3.35531	2.34284	2.6716
10:20124952|20132208	0	0	0	0.710842	0	0	0	0	0	1.84833	1.75124	0
10:20230784|20246715	0	1.52476	0	0	0	0	0	0	0	0	0	0
10:20230784|20250480	0	0.919005	0	0	1.53829	0	0	0	0	0.802507	0	0
10:20245270|20246715	0	0	2.03325	0	2.48113	0	0	0	0	0.71505	0	0
10:20245270|20250480	0	0	0	0	0	1.00201	0	0	0	0	0	2.22635
10:20333392|20334645	0	0	0	0	0.926094	0	0	0	0	2.32414	0	0.710663
10:20434465|20443369	0	0	0.965015	0	0	2.07549	0	0	0	0	0	0
10:20979380|20988684	0	0.915873	0	0	0	0	0	0	0	0	0	0
10:21304530|21309093	0	0	0	0	0	0	0	0	0	0	1.46131	0
10:21304530|21337075	0	0	0	0	0	0	0	0	0	0	2.80298	0
10:21345077|21354743	0	0	0	0	0	0	0	0	0	0	2.20636	0
10:21345077|21358840	0	0	1.34074	1.25085	0	0	0	0	0	0	0	0
10:21349312|21358840	0	0	0	0	0	1.33151	0	0	0	0	0	0
10:23123852|23140097	0	0	0	0	0	0	0.950216	0	0	0	0	0
10:23798746|23806040	0	0	0	0	1.59453	3.66614	0	0	1.2588	1.3647	0	1.41774
10:23803758|23806040	0	0	0	0	0	0	0	0	2.2668	0	0	0
10:23816293|23819161	0	0	0	0	0	0	0	0	0	1.04316	0	0
10:23816293|23823018	0	0	0	0	0	0	0	0	0	0	0.711613	0
10:24155235|24180063	0	0	0	0	0	0	0	0	0	0	1.46034	0
10:24179117|24182841	4.97445	4.23351	0	0	0	1.99727	0	0	0	1.38248	2.04311	0
10:24669009|24676103	0	0	0	0	0	0	1.25933	0	0	0	0	0
10:24777894|24787897	0	0	0	0	0	0	0	0	0.628333	0	0	0
10:24784790|24787897	0	0	5.20732	2.64435	1.8497	2.35125	0	2.44198	1.9812	1.66798	0	1.09534
10:24784790|24799266	0	0	0.644786	0	0	0	0	0	0	0	0	0
10:24804399|24808197	0	0	2.21582	0	0	0	0	0	0	0	0	0
10:24817867|24826298	0	7.01088	0	0	3.09423	2.39929	0	0	6.62827	1.77286	1.16749	0
10:24882554|24888600	0	0	0	0	0	0	0	0	0	0.666254	0	0
10:25220611|25239738	1.43873	0.61723	2.38593	2.19198	0	0	4.31612	0	0	0	0	0
10:25220611|25271641	0	0	0	0	0	0	0	0	0	2.98929	0	0
10:25220611|25289730	4.75552	16.0936	8.48494	5.6599	7.40433	7.55502	12.5243	8.56659	8.60302	5.28646	8.74876	6.41159
10:25239626|25289730	0	0	0	1.55687	0	0	1.6689	0	0	0	0	1.76888
10:25267308|25271641	0	3.35447	3.0447	3.66246	0.924001	2.59035	2.40747	1.80134	3.03184	0	0	0
10:25267308|25284041	0	0	0	0	1.88655	0	0	0	0	0	0	0
10:25267308|25289730	20.5868	23.0692	13.6199	10.4853	9.05695	22.2029	15.3723	13.476	13.4169	6.97576	9.33931	9.50777
10:25283893|25289730	3.10443	0	0	2.95149	3.19106	1.71294	3.46763	1.443	3.76792	3.72008	2.62783	1.86948
10:25441573|25443954	3.07985	1.21981	2.25679	0.621695	6.09477	4.00608	0	5.03476	4.46664	2.87019	3.51033	4.77088
10:25441573|25460896	2.09129	0	1.28526	0	0	0	0	1.13157	0	0	0.592995	2.47478
10:25441573|25468138	0	0	0	0	0	0	0	1.08471	0	0	0	0
10:25460792|25473163	2.04244	0	0	0	0	0	0	0	0	0	0	0
10:25501824|25502138	0	0	0	0	0	0	0	0	0	0	0.587676	0
10:25501824|25502387	0	0	0	0	0	0	0	0	0	0	0	1.65528
10:26313847|26318453	0	0	0	0	0	0	0	0	1.56822	0	0	0
10:26327687|26341040	0	0	0.743949	0	0	0	0	0	0	0	0	0
10:26327687|26344723	0	0	0	0.623806	0	0	0	0	0	0	0	0
10:26327687|26352375	0.680054	1.84517	0	0	2.46127	4.34766	0	0	0	0	3.21157	1.44302
10:26337768|26352375	0	0	0	0	1.87317	0	0	0	1.25562	0	0	0
10:26342508|26344723	0	0	0	0	0	0	0	0	0	0	1.25503	0
10:26877157|26880770	0	2.00439	0	0	0	0	0	0	0	0	0	0
10:28263501|28354779	0	0	0	2.22991	0	0.66913	0	0	0	0	0	0
10:28354605|28383724	0	1.52476	0	2.58741	0	2.33352	3.89563	0.723971	1.88395	0	0	1.41416
10:28465758|28466060	0	0	0	0	0	0	0.633419	0	0	0	1.75319	0
10:28465758|28496945	0	4.15334	0	0.930991	0	0	0	0	1.90782	0	0	0
10:28551618|28560165	0	0	0	0	0	0	0	0	0	0.99606	0	0
10:28569897|28575706	0	0	3.28636	0	2.98441	2.33126	2.20303	3.39688	4.46346	5.90448	8.56024	3.71609
10:28580393|28586072	0	0	0	0	0	0	0	0	0	0	0.586703	0
10:28591885|28592905	0	0	0.6437	0	0	0	0	0	0	0	0	0
10:29499932|29506579	0	0	2.89183	0	0	0	0	0	0	0	0	0
10:30547657|30566506	0	0	0	0	0	0	2.55905	0	0	1.04385	0	0
10:30587439|30597805	0	0	0.736003	0	0	0	0	0	0	0	0	1.8574
10:30590025|30591102	0	0.927494	0	0	1.25823	0	0	1.7977	0	0	0	1.41534
10:30722646|30771840	0	0	0	0	0	0	0.943708	0	0	0	0	0
10:31505773|31534896	0	7.0211	0	2.79609	0	3.35231	1.28791	0	0	0	2.33498	2.47478
10:31517384|31534896	1.0442	6.45035	1.92896	4.663	2.46439	4.57578	13.5371	1.93744	3.98293	8.21682	2.98352	5.8637
10:31534663|31534896	2.24491	4.60804	3.39817	3.83262	3.94901	3.61794	7.84503	0	5.77034	5.01864	9.50672	4.53433
10:34008993|34012137	3.16921	9.3851	20.8492	12.7235	5.80498	15.4708	5.70984	8.82804	7.96667	11.176	9.25129	10.5185
10:34398114|34411459	0	0	0	0	0	0	0	0	0	0.665147	0	0
10:36985127|36989288	0	0	0	0.932026	0	0	0	0	0	0	0	0
10:3802740|3873441	0	0	0	0	0	0	0	0	0	0	0	1.06417
10:3872927|3873441	0	0	0	1.86888	0	0	0	0	0	0	0	0
10:39395005|39416662	0	0	0.644786	0	0	0	0	0	0	0	0	0
10:39395005|39455135	0	0	0	0	0	0	1.4015	0	0	0	0	0
10:39511739|39515669	0	0	0	0	0	0.85107	0	0	0	0	0	0
10:39639220|39641394	0	0	0	0	0	0	0.943708	0	0	0	0	0
10:39742691|39799977	0	7.13229	0	2.7936	0	6.95318	3.47013	0	0	4.2492	0	1.83233
10:39742691|39806983	0	0	0	0	0	0.665756	0	0	0	0	0	0
10:39783143|39799977	0	0	0	0	0	0	0	0	1.73801	0	0	0
10:39783143|39806983	0	0	1.62001	1.86822	0	0	0	0	0	0	0	0
10:39804952|39806983	0.68232	0	0	0	0	0	0	0	0	0	0	0
10:40076564|40080807	4.1518	4.60469	4.31272	4.69277	4.63548	4.17756	8.07493	4.78955	5.20148	2.43072	6.51218	3.55781
10:4015514|4018599	0	1.22083	0	0	0	0	0	0	0	0	0	0
10:40233108|40239787	4.52459	0	0	0	0	0	0	0	0	0	0	0
10:40254264|40254464	13.1619	28.022	15.5839	0	15.2877	18.1683	14.7324	19.8044	17.1344	13.3557	13.3212	0
10:4028395|4056861	0	0.609904	0	0	0	0	0	0	0	0	0	0
10:4032232|4048268	0	2.13467	0	0	0	0	0	0	0	0	0	0
10:4041773|4056861	0	0	0	0.938534	0	0	0	0	0	0	1.16944	0
10:40434304|40436212	0	1.85444	1.28526	1.24447	0	0	1.25828	1.43936	3.77551	0	0	0
10:40466638|40469955	1.56054	6.32023	0	2.25105	1.00979	0	1.35926	1.83265	5.36557	3.79644	0.904747	5.14966
10:40836288|40841815	0	6.31954	0	0	0	0	1.25828	0	0	0	0	0
10:40841354|40843143	0	0	0	0	0	0	1.5739	0	0	0	0	0
10:41272958|41285699	0	0	0	0.621695	0	0	0	0	0	0	0	0
10:41521918|41524145	13.363	28.0841	25.5911	0	0	26.2503	27.369	30.8515	32.2271	26.8426	24.2755	0
10:41550722|41553568	0	0	0	0	0.924001	0	0	0	0	0	0	0
10:41740840|41745921	0.680054	0	2.92522	1.06112	0	0	5.28151	0	2.19655	0	3.21318	3.18304
10:41743042|41745921	0	0	0	0.967718	0	0	0	0	0	0	0	0
10:41894042|41898425	0	0	0	0.635746	0	0	0	0	1.88828	0	0	0
10:42196466|42197901	0	0	0	0.932026	3.06195	1.78957	0	0	2.80676	0	1.46034	0
10:42339825|42360247	0	0	0	0	0	0	0	0	0	1.99433	0	0
10:42360165|42408749	0	0	0	0	0	0.666866	0	0	0	0	0	0
10:42360165|42425308	0	0	0	0	0	0	0	0	0	0	1.16749	0
10:42415549|42438405	0	2.38199	0	0	0	0	0	0	0	0	0	0
10:42415549|42454530	0	0	0	0	0	0	1.25933	0	0	0	0	0
10:42454307|42454530	0	0	0	0	0	0	0	0	2.75584	0	0	0
10:42692911|42696417	0	0	0	2.52418	0	0	0	0	0	0	0	0
10:42783442|42789414	0	0	2.43378	0	0	0	0	0	0.940932	1.77942	1.59579	3.39755
10:42783442|42791291	9.60943	5.65757	7.79096	10.682	5.6695	14.1152	11.8416	4.40736	5.42893	12.3624	8.99437	6.62322
10:42783442|42796264	0	1.21981	0	0	0	0	0	0	0	0	0	0
10:42783442|42797733	0	0	1.65515	0	0	0	0	0	0	0	0	0
10:42783442|42798855	1.79562	0	0	0	0	3.64328	0	0	0	0	0	0
10:42789300|42791291	1.36011	2.40389	1.02904	2.31672	2.20679	4.67264	5.34744	4.46554	7.22608	1.34154	1.84094	0
10:42789300|42797733	3.12453	5.55742	3.40151	0	6.15727	2.3752	5.15135	0	1.56822	3.34375	7.83215	2.82832
10:42789300|42798855	0	0	0	0	0	0	0	0	1.25771	0	1.75415	0
10:42789300|42806671	0	0	0	0	0	0	0	0	0	0	0	1.41769
10:42798747|42806671	0	2.49936	0	3.65788	0	0	0	0	1.82751	0	0	0
10:42815055|42816469	0	0	0	1.58588	0.924001	1.07009	0	0	0	0	0	0
10:42815055|42823979	0	0	0	2.53398	0	3.09867	1.25933	0.720278	0	0	0	0
10:43393871|43395692	9.48165	10.4192	5.75282	4.56798	6.51335	9.47823	6.46244	6.36319	9.21188	9.48031	10.4552	6.37839
10:43393871|43413547	1.70127	0	4.83022	3.82286	0.924001	0	0	0	0	6.64483	10.9325	5.30901
10:43921387|43936091	0	1.08957	0	0	0	0	0	0	2.19551	0	0	0
10:43928323|43936091	0.680054	0	0	0	0	0	0	0	1.25458	0	0	0
10:43964578|43966413	0	0	0	0	0	2.98074	0	0	0	0	0	0
10:43967465|43974020	0	0	0	0	0	2.13686	0	0	0	0	0	1.06062
10:43973658|43975184	0	0	0	0	0	1.53992	0	0	0	0	0	0
10:43986251|43992705	0	0	0	1.86198	0	0	0	0	0	0	0	0
10:43989094|43992705	0	3.26112	0	1.78623	1.33721	0.665756	0	4.55936	2.09173	1.11246	7.82795	0
10:4407805|4418631	0	3.48445	0	0	0	2.66414	0	0	0	0	0	0
10:4413309|4414643	0	0	0	0	0	0	0	0	0	1.66231	0	0
10:4418259|4418631	0	0	0	0	0	0	0	0	0	0.997167	0	0
10:44303567|44319554	0	0	0.642629	0	0	0	0	0.720278	0	0	0	0
10:4439492|4439736	0	0	0	0	0	0	0	0	0	0	0	0.70708
10:45090993|45097514	1.36124	0	0	0	0	0	0.631236	0	0	0	0	0
10:45588380|45618629	0	0	0	0	0	0	1.70057	0	0	1.33589	0	0
10:45618498|45652738	0	0	0	2.53349	0	0	0	0	0	0	0	0
10:45638321|45652738	0	0	0	0.930991	2.18509	0	0	0	0	0	0	0
10:45648591|45652738	0	0	0.970457	0	0	0	0.952268	0	0	1.99433	0	0
10:45652588|45671526	0	0	0.6437	0	0	0	0	0	0	0	0	0
10:4727367|4783973	0	0	0	0	0	0	0	0	0.947421	0	0	0
10:4746617|4783973	0	0	0	0	0	1.68237	0	0	1.36389	0	0	0
10:4856858|4857193	0	0	0	0	0	0	0	0	0	1.91675	0.583745	0
10:4856858|4969292	0	0	0	0.62273	0	0	0	0	0	0	0	0
10:50604751|50618271	0	0	0	0	0	0	0.943708	0	0	0	0	0
10:50617712|50618271	6.47709	4.57735	0	3.66207	2.46127	1.97787	3.48013	0	6.63869	8.75626	1.79559	4.25592
10:50617712|50660726	0	0	0	0	0	1.00655	0	0	0	0	0	0
10:50645663|50649933	0	0	0	0	0	0	0	0	0.943023	0	0	0
10:50699940|50700656	0	1.22083	0	0	0	0	2.5813	0	0	0	0	2.12361
10:50707663|50711044	0	1.22184	0	0	0	0	0	0	0	0	0	0
10:5072037|5075947	0	0	0	0	0	0	0	0	0	0	2.2317	0
10:50728090|50735352	0	0	0	0	0	0	0	0	0	0	1.45936	0
10:50748806|50754122	2.80718	4.59484	0	1.24236	4.99986	0	2.83217	3.64509	0	2.24377	3.50344	3.55121
10:50748806|50767507	20.8105	28.8924	26.2836	19.2689	17.0945	20.1306	20.2081	8.13507	23.3859	25.5341	21.4564	17.7379
10:50767091|50767507	3.40027	2.90034	2.36575	2.48579	3.18958	1.33151	3.46131	8.10529	4.42598	1.66121	1.75124	5.65782
10:5146253|5154595	0	0	0	0	0	0	1.57813	0	0	0	0	0
10:52261727|52290923	0	0	0	0.64033	0	1.66439	0	0	4.13373	5.94717	0	0
10:52284103|52290923	6.12048	6.14547	3.80885	0	0	5.46082	6.03545	3.23826	4.62953	9.21377	3.14437	6.41359
10:52304587|52317151	0.690502	0	0	0	0	0	1.26583	0	0	0	0	0
10:52311400|52314404	1.0545	0	0	0	0	0	0	0	0	0	0	0
10:52314355|52317151	0	0	0	0	0	0	1.09431	0	0	0	1.17674	0
10:52346049|52358937	0	0	0	0	0	0	0	0	0	0	0	1.06062
10:52349072|52353492	0	0	0	0	0	0	0	0	0.945324	0	0	0
10:52349072|52358937	0	0	0	0	0	0	0	0	1.25458	0	0	0
10:52429193|52430216	0	0	3.75599	0	1.86466	0	0	0	0	0	0	1.06779
10:52429193|52433444	0	1.93238	0	0	0	0	0	0	0	0	0	0
10:53281349|53283944	0	0	0	0.935171	0	0	0	0	0	0	0	0
10:53283837|53292375	0	0	0	0	0	2.33237	0	0	0	0	0	1.1376
10:53283837|53298205	0	0	0	0	0	0	0	0	5.64492	0	0	0
10:53291764|53292375	0	0	0	0	2.91933	2.34439	1.26372	0	5.74956	2.30999	3.23275	1.06062
10:53291764|53298205	39.608	53.181	40.4646	29.1585	23.6944	63.7029	66.0754	31.2622	66.1462	52.5528	44.6853	37.2113
10:53291764|53301681	1.36011	0	0	0	0	0	0	0	0	0	0	0
10:53292258|53298205	0	0	0.974948	0	0	2.04856	0	0	3.16302	2.4753	2.51803	1.1146
10:53292258|53301681	0	0	2.20908	0	0	0	0	0	0	0	0	0
10:53296214|53298205	0	0	0	0	0	0	0	2.71242	0	0	0	0
10:53301502|53319719	0	0	0	0.620661	0	0	0	0	0.940932	3.35634	0	0
10:53312508|53358207	0	0	0	0	0	1.67114	0	0	0	0	0	0
10:53348472|53349259	0	0	0	0	0	0	0	0	0	1.32808	3.27237	2.87564
10:53348472|53358207	0	5.19097	5.13118	2.91757	1.27863	2.44546	2.58305	1.07862	3.57229	0	0.608417	1.15569
10:53348472|53367435	0	0	0	0	0	0	0	0	0.628333	0	0	0
10:53611352|53620215	0	0	1.97819	0	0	0	0	0	0	0	0	0
10:53611352|53626034	0	0	1.29396	0	0	0	0	0	2.45297	0	0	0
10:53674566|53690148	0	2.44586	0	0	0	1.67562	0	0	0	0	1.83623	0
10:53933492|54030794	0	0	1.60657	0	0	2.33237	0	0	0	0	0	0
10:53977023|54030794	12.849	14.6214	16.5397	19.3987	8.68127	26.4736	10.7331	5.52419	7.68194	7.49813	9.98639	8.74095
10:53994247|54030794	1.02008	1.21981	0	0	0	0	0	0	3.21746	0	0	0
10:54014415|54030794	9.30308	14.2487	8.38924	7.56803	8.68513	13.2527	8.72741	7.21172	15.3045	7.96963	8.92534	7.25704
10:54025714|54030794	2.06588	4.9552	0	0	1.176	0	0	0	1.08373	0	0	0.710631
10:56087531|56089839	0	0	0	0	0	0	0	0	2.51126	0	0	0
10:56123511|56151853	3.74598	3.35447	1.83876	0	3.69293	0	0	0	1.3356	0	0	0
10:57495898|57502710	0.688079	0	0	0	0	0	0	0	0	0	0	1.77734
10:57504582|57509114	0	0	0	0	0	0	0	0	0	1.68029	0	0
10:58287142|58294905	0	0	0	2.08668	1.23063	0	0	0	0	0	0	0
10:58292565|58294905	0	0	0	0	2.15771	0	0	0	0	0	0	0
10:58294711|58296239	1.02008	0	0	0	0	0	0	0	0	0	1.23442	0
10:58410053|58412553	0	0	0	0.66533	0	0	0	0	0	0	0	0
10:58454573|58460605	0.681187	0	0	0	0	0	0	0	0	0	0	0
10:58467115|58467473	0	0	0	0	0	0	0	0	0	0	1.16945	0
10:58467115|58470762	0	0	0	0	0	1.00085	1.57496	0.71908	0	1.32808	1.75124	4.70713
10:58483029|58483983	0	0	0	0	0	0	0.630187	0	0	0	0	0
10:58484442|58485881	0	0	0	0	0	0.66913	0	0	0	0	0	0
10:58507521|58524296	0	0	0	0	0	0	0	0	0	2.66727	0	0
10:59166504|59178857	10.0937	9.39766	7.83289	4.79052	8.59234	12.2808	0	10.2024	10.1385	6.98572	5.3776	6.15372
10:59166504|59183711	1.47844	0	0	0	0	0	0	0	0	0	0	0
10:59166504|59192815	0	0	0	0	0	0	0	0	0	1.32808	0	0
10:59192166|59192815	9.22454	15.1286	12.0546	6.31756	7.14263	12.2871	7.69718	9.25581	4.0756	5.55602	8.35436	8.50525
10:59361861|59369683	0	0	0.967172	0	0	0	0	0	0	0	0	0
10:59427944|59438915	0	0	0	0	0	0	0	0	0	0	1.18831	0
10:59451206|59456809	0	0	0	0	0	1.34618	0	0	0	0	0	0
10:59454946|59456809	0	2.43962	0	0	0	0	0	0	0	0	0	0
10:59599928|59600693	2.85649	0	7.26672	5.89202	3.10945	2.66414	0.943708	7.93629	6.87101	3.41465	3.23772	8.65973
10:59727957|59733157	0	0	0	0	0	0	0	0	0	0	0	2.12124
10:59727957|59740822	0	1.532	0	0	0	0	0	0	0	0	0	1.27396
10:60004795|60013774	0	0.914856	0	0.64092	0	1.36876	0	0	0	1.67699	0	0
10:60012462|60013774	0	3.07953	0	0	0	0	1.89056	0	0	0	0	0
10:60042121|60064408	0	4.24602	4.12432	4.75116	0	5.48575	1.93374	0	2.74803	0	0	0
10:60062460|60064408	0	0	0	0.930991	0	0	0	0	0	0	0	0
10:61224273|61225480	0	0	0	0	0	0	0	0.720278	0	0	0	0
10:61245926|61249760	1.82937	0.914856	0	0	0	0	0	0	3.34535	0	0	0
10:61482336|61548215	0	0	1.28526	0	0	0	0	0	0	0	0	0
10:61527060|61548215	1.29497	0	0	3.42962	0	0	3.72948	0	1.56822	0	1.31926	0
10:61660912|61663776	0	0	0	0	0.759718	0	0	0	0	0	0	0
10:61660912|61665466	0	1.56449	2.27737	2.20352	2.83823	2.69242	0	5.9418	0	0.99606	1.79493	0
10:61663690|61665466	0	0	0	0	0	0	0	0	0	0.66404	0	0
10:61684880|61689905	0	0	0	0	0	0	0	0	0	3.61528	0	0
10:61725856|61728221	0	2.03078	1.71043	0	0	0.666866	1.57704	1.16408	0	0	0	0
10:61866391|61870247	0.681187	0	0	0	0	0	0	0	0	0	0	0
10:62284279|62286652	0.681187	0	0	0	0	0	0	0	0	0	0	0
10:62433052|62441246	0	0	0	0	0	3.01108	0	0	0	0	0	0
10:62435459|62441246	0	0	0	0	0	1.17348	0	0	0	0	0	0
10:62437434|62441246	0	0	7.01973	5.79592	7.72165	8.6141	5.60343	10.3727	8.61773	0	5.52042	0
10:62441135|62447773	0	0.914856	0	0	0	1.35869	0	0	0	0	0	0
10:62447024|62447773	8.78447	10.3596	0	0	0	3.98939	0	0	9.8087	0	4.00136	1.55563
10:62468290|62471135	0	0	0	0	0	0	0	0	0	2.66962	0	0
10:62619585|62627682	0	0	0	0	0	2.33126	0	0	0	0	0	0
10:62633977|62643372	0	0	0.835292	0.935171	0	0	0	0	0	1.32808	2.63573	0
10:62639861|62640862	0	0	0	0	0	1.00085	0	0	0	0	0	0
10:62639861|62643372	0	0	0	0	0	0	0	0	1.09478	0	0	0
10:62642037|62643372	0	0	0	0	0	0	0	1.7989	0	0	0	0
10:62745263|62747086	0	0	0	0	0	0	0	0	1.36156	0	0	0
10:62746901|62747464	1.71522	0	0	0	0	0	0	0	2.83233	0	0	0
10:62747344|62751016	0	0	0	0	0.770742	0	3.03438	0	0	0	0	0
10:62750547|62751016	0	0	0	0	8.52959	7.1198	5.36474	0	6.39363	4.43367	2.90393	2.24402
10:62760094|62760279	0	2.21997	3.16835	0	0	0	5.52804	8.23266	4.96356	6.76464	0	0
10:62763440|62766782	0	1.52476	0.963944	0	2.18505	0	0	0	0.630467	0	0	0
10:62770855|62772065	13.1257	17.6513	11.3738	15.8825	12.5126	11.8326	20.2518	15.8151	21.9623	22.0089	20.1095	19.4473
10:62770855|62776963	0	0	0	0	0	0	0	0	0	0	0	1.7677
10:62776568|62776963	13.6965	10.8284	9.79524	11.9906	12.8096	12.7208	21.7881	16.963	11.6473	8.25185	17.0427	14.6408
10:62776568|62783927	0	0	0	0	0	1.33262	0	0	0	0	0	0
10:62776568|62785594	0.863946	2.44063	0	0	1.23166	0	0	0	0	0	1.75124	0
10:62780441|62785594	2.15044	2.69547	1.15306	2.79297	1.90703	0	5.39649	6.30834	0	6.65646	3.47316	1.25182
10:62780441|62791042	0	0.609904	0	1.88637	0.716197	0	2.0929	0	0	0	1.16749	0
10:62783234|62785594	0	0	0.965015	1.77295	0	0	0	0	0	0	0	0
10:62783883|62785594	0	0	0	0	0	0	0	0	0	1.89687	0	0
10:62785431|62791042	2.04243	0	0	0.620661	0	0.666866	0	0	0	0.99606	0	0
10:63015802|63017610	0	0	0	0	0.954415	0	0	0	0	0	0	0
10:63015802|63019527	0	0	0	0	0	0	0.632327	0	0	0	0	0
10:63264026|63269704	0	0	0	0	0	0	0	0	1.95156	0	0	0
10:63264026|63283341	0	0	0	0	0	0.999744	0	0	0	0	0	0
10:63269628|63278465	0	0	0	0	0	0.998635	0	0	0	0	0	0
10:63269628|63283341	0	1.52476	0	0	0	0	0	0	0	0	0	0
10:63286017|63287578	0	0	0	0	0	0	0	0	0	0	1.53246	0
10:63287519|63288009	1.57443	2.48418	0	0	0	0	0	0	3.1019	0	0.643535	2.87311
10:63289052|63299239	1.39774	1.57956	3.86452	2.80241	2.66754	2.99701	0	1.08351	3.15897	5.97601	3.21352	5.24974
10:63289143|63299239	0	0	0	0	0	0	0	0	0.627288	0	0	0
10:63290504|63299239	0	0	0	2.85332	0	0	0	0	0	0	0	0
10:63306348|63307909	0	0	0	0	0	0	0	1.87816	0	1.00175	0	0
10:63306348|63308450	0	0	0	1.58121	0	0	0	0	0	0.66404	1.75415	0
10:63306348|63311914	0	0	0	0	2.59861	0	0	0	0	0	0	0
10:63323967|63331897	0	0	0	0	0	0	0	0	2.68166	0	0	0
10:63325126|63335877	0	0	0	0	0	0	0	0	0	0.998274	0	0
10:63326660|63331897	0	0	0	1.25076	0	0	0	0	0	0	0	0
10:63331745|63335877	0	0	0	0	0	0	0	0	0.701843	0.897236	0	0
10:67034599|67036005	4.54087	5.89343	6.45422	5.25763	8.98993	0	9.85426	5.30724	9.84885	10.308	6.56679	4.7495
10:67034599|67039577	1.367	5.14839	2.89399	0.932026	0	0	1.25828	2.51918	7.98494	3.32804	4.71586	3.19175
10:67034599|67063071	2.38132	1.52476	0	0	0	0	0	0	0	0	0	0
10:67035885|67039577	0	0.610921	0	0	0	0	0	3.61098	0	0	0	0
10:67157907|67158071	3.03375	4.97967	1.41352	3.14114	7.00953	4.17575	6.299	1.25672	3.47299	6.59783	6.45933	4.17508
10:67157907|67164222	0	0	0	0	0	0	0	0	0.669736	0	0	0
10:67157907|67189849	54.4373	41.9797	33.448	35.251	38.9294	35.7093	35.9213	34.2434	32.1	52.1368	32.3941	28.6119
10:67157907|67215375	1.70816	0	0	3.44535	0	0	0	0	0	2.87703	1.45936	0
10:67243772|67248150	0	0	0	0	0	0	0	1.07982	0	0	0	0
10:67245506|67254583	0	0	0	0	0	0	0	0	0	0	0	0.708258
10:67249630|67254583	0	0	0	0	0	0	0	0	0	0	0	1.43707
10:68118251|68128993	2.04243	2.44268	1.83574	2.02084	1.23166	2.72789	2.83112	2.59982	0.627288	3.3019	3.80121	1.7677
10:68118251|68135106	7.21382	9.35504	6.66787	8.20983	8.32973	12.3631	6.24908	3.11734	12.6778	19.9062	4.57734	7.42681
10:68118251|68186256	0	0	0	0	0	0.999744	0	0	0	0	2.18418	0
10:68118251|68243229	0	0	0	0	0	0.666866	0	0	0	0	0	0
10:68126699|68128993	0	3.65037	2.64395	1.86119	0	1.00198	1.65516	1.80619	0.627288	3.65222	3.26941	0.929441
10:68126699|68135106	0	0	0	0	0	2.12237	2.51655	0	0	0	0	0
10:68126699|68186256	0	0	0	0.620661	0	0	0	0	0	0	0	0
10:68165169|68186256	0	0	0	0	0	0	0	0	0	0.665147	0	0
10:68186026|68186256	0	11.3	4.55114	2.29042	0	3.66277	3.65237	4.1602	6.09942	6.43704	4.25363	4.37984
10:68186026|68243229	11.3302	15.4411	7.62002	11.7036	7.24422	6.49911	9.80976	8.83904	9.41059	23.927	6.66544	9.56646
10:68740919|68751328	0	0	0	0	0	0	0	0	0	0	2.62685	0.70708
10:68748376|68751328	0	8.41405	15.3995	1.86513	5.72189	0	0	5.43318	9.09336	10.3361	10.1178	12.9702
10:6900570|6920086	0	0	0	0	1.84907	0	0	0	0	0	0	0
10:69215302|69249728	1.70358	0	0	3.25084	0	0	1.84683	0	2.19655	0	0	0
10:69248771|69249728	3.10918	0	3.23939	0	2.72879	4.24601	0	0	3.45535	1.99212	4.70782	1.7994
10:6979514|6996576	0	0	0	0	0	0	0	0	0	0.99606	0	0
10:69927695|69932496	0	2.14394	0	1.55993	0	0	0	0	0	0	0	0
10:70142579|70154836	15.0327	17.1967	10.3338	10.2076	7.73652	14.2109	15.453	11.5069	13.553	4.52405	13.2844	12.1486
10:70142579|70175167	0	0	0	0	2.53016	1.89833	0	0	0	0	0	3.46385
10:70154708|70169252	1.70703	0	1.01077	0.930991	0	0	0	0	0	1.41019	1.76889	1.42021
10:70154708|70175167	3.42927	8.55822	0	11.9966	5.65096	5.19084	6.38447	0	9.78192	5.47807	2.93757	5.48994
10:70167002|70175167	1.98658	3.0827	1.65563	3.1384	2.27592	4.66367	0.635515	3.383	5.36899	3.66006	7.08388	5.91558
10:71027898|71079236	1.77958	0	0	0.620661	0	0	0	0	0	0	0	0
10:71229087|71237031	0	0	2.2625	0	1.2985	0	0	0	0	0	0.875618	0
10:71233357|71235613	0	0	0	0	0	0	0	0	0	0	1.17341	0
10:71234865|71237031	0	0	0	0	0	0	0	0	0	0	0	1.41416
10:7134522|7154485	0	0	0	0.930991	0	0	0	0	0	0	0	0
10:71363450|71366105	0	0	0	0	0	0	0	0	0.718432	0	0	0
10:71363450|71372880	1.02235	0	0	0	0	0	0	0	0	0	0	0
10:71363450|71376786	0	0	0.963944	2.17961	0	0	0	0	4.81719	2.65727	0	0
10:7140319|7154485	2.72135	0	0	1.94615	3.42177	4.50051	0	1.07862	0	1.44133	0	0
10:7152864|7154485	16.5835	13.1091	25.3588	13.4339	16.8818	15.9398	13.5148	9.0787	17.2126	14.1083	9.72584	17.1846
10:7152864|7160807	4.94908	4.33107	7.31502	7.48925	5.71753	4.66898	12.6757	6.74941	10.7276	10.0461	13.0842	9.495
10:75131021|75131684	0	0.617102	0	0	0	0	2.59629	0	0	0	3.85473	0
10:75131021|75136001	0	0	0.658249	0	0	0	0	0	0	0	0	0
10:75274017|75279961	10.9047	23.5316	22.5171	12.4397	13.4461	7.75418	14.9336	12.4438	16.9332	19.183	16.9435	11.9391
10:75276771|75279961	0	0	1.74099	0	1.23063	0	0	0	2.39357	1.68702	0	0
10:75428181|75430131	0	0	0	0	0	1.15855	0	0	0	0	0	0
10:75428181|75438211	0	0	0	0	0	0	0	1.09903	0	0	0	0
10:75684292|75695046	0	0	0	0	0	0	0	0	1.25884	0	0	0
10:75684292|75700095	18.289	17.9144	8.59226	14.2572	12.2935	17.1818	9.55879	9.93588	18.8767	10.3453	8.93232	6.82102
10:75694715|75700095	3.76442	2.35153	2.03217	2.94893	2.23831	1.34048	2.02838	6.02269	2.27431	6.57498	2.63853	0
10:75717438|75721539	0	0	0	0	1.2327	0	0	0	0	0	0	0
10:75904384|75911656	0	0	0	0	0	1.00312	0	0	0	0	0	0.71189
10:75910154|75916911	1.70127	0	0	0	0	0	0	0	0	0	0	0
10:75915064|75916911	0	2.31958	0	0.620661	2.01519	0	0	0	0	0	0	0
10:76217314|76221162	0	0	0	0	0	0	0	2.15724	0	0	0	0
10:76225288|76226315	0	0	3.23049	0	0	0	0	0	1.56822	0	0	0
10:76367308|76370079	2.80805	0	0	0	0	0	0.946896	1.08226	0	1.66683	1.21302	1.84482
10:76399856|76401535	0	0	0	0	0	0	0	0	0	0	0	1.18767
10:7640045|7640815	0	1.60749	0	2.81264	0	1.33262	2.89459	0	0	0	0	3.11102
10:7640045|7644429	0	0	0	0	0	0	2.5702	3.23706	0	0	0	1.41534
10:7640045|7649155	0	4.49839	4.21628	0	0	5.61743	7.16092	1.7977	3.89386	0	5.68274	2.85386
10:7644325|7649155	0	1.52476	3.03919	3.16755	0	2.89042	0	0	3.54866	2.8549	0	0
10:7647590|7649155	0	0.758309	0	0	0	1.72999	1.34718	0	0.689519	1.09254	0	2.13399
10:76511020|76512568	3.26014	0	0	0	2.17023	0	1.02486	3.95328	0	0	0.99144	2.01582
10:7669553|7673720	2.04129	0	2.2492	0	0	0	0	0	0	0	1.16846	0
10:7669553|7676362	0	0	5.29339	0	0	0	0	0	2.19551	1.6601	0	0
10:76797795|76800914	0	0	0	0	0	0	0	0	1.59964	0	1.88589	0
10:7701610|7703120	2.39407	0	0	0	0	0	0	0	0	0.997167	0	0
10:7705460|7710647	0	0	0	0	0	0.66913	0	0	0	0	0	0
10:77085267|77096535	0	0	0	0	0	0	1.71066	0	0	0.998289	0	0
10:77303173|77317350	0	0	0	0	2.15464	0	0	0	0	0	0	0
10:7738723|7743736	0	0	0.642629	0	0	0	2.0668	0	0	0	0.900816	1.06062
10:77497363|77514414	0	0	0	0.621695	1.23901	0	0	0	0	0	0	0
10:77630726|77630894	74.4043	97.025	90.2039	87.1185	57.2294	91.6312	119.885	92.4568	107.616	113.717	96.8583	117.94
10:7795644|7795861	0	0.609904	0	0	0	0	0	0	1.99742	0	0	0
10:7799553|7805022	0	0	0.642629	0	0	0	0	0	0	0	0	0
10:77997524|77999934	0	0	0	0	0	0	0	0	0	0.756893	0	0
10:7804956|7814811	0	0	0.963944	0	0	0	0	0	0.940932	0	0	0
10:7810362|7814811	0	0	1.1183	0	1.53829	1.72038	0	0	0	0	0	0
10:78202880|78204392	0	0	0	0	0	0	0.630187	0	0	0	0	0
10:78228779|78231535	1.02811	0	0.709463	0	0	0	0	0	0	0	0	0
10:7924685|7933208	0	0.915873	0	0	0	0	0	0	0	0	0.584718	0
10:79859781|79859955	1.02121	0	0	1.00722	0	0	0	0	2.87157	2.08896	3.60714	0
10:79930635|79932078	0	0.920022	0.792368	0	0	0	0	0	0	0	0	0
10:80000712|80001090	0	0	0	0	0	0	1.89695	4.69334	0	0.66404	1.75415	0.75311
10:80069282|80070051	0	1.53096	3.61548	0	0	3.66166	0	0	0	0.99606	1.46824	0
10:80082615|80086432	0	2.44268	0	0	0	0	0	0	2.19551	0	0	0
10:80228322|80230127	0	0	0	1.24442	0	0	0	0	0	0	0	0
10:80333503|80334134	0.680054	0	0	0	0	0	0	0	0.765739	0	0	0
10:80671559|80672015	0	0	0	0	0	0	0	0	0.941977	0	0	0
10:80712112|80712930	0	0	0	1.2029	0	0	0	0	0	0	0	0
10:80712112|80715179	10.134	13.424	19.2011	15.4555	15.4619	12.8564	21.3165	5.43383	18.9378	8.91604	16.0275	11.4628
10:80712112|80719812	2.51009	1.84141	0	0	0	0	2.42568	0	0	0	1.46132	0
10:80764602|80771366	1.36469	0	0	0	0	2.66303	0	0	2.24065	0	0	2.54097
10:80764602|80778342	0	0	0	0	0	0	0	0	1.31302	0	0	0
10:80766163|80771366	2.90286	1.53721	7.10367	0	1.86091	6.39038	1.57496	4.70617	2.83354	7.58701	6.21192	4.99909
10:80803583|80803888	0	3.41552	11.1891	7.66586	4.58986	9.36325	0	0	0	0	0	4.67147
10:81108748|81118229	0	0	2.57484	2.90209	2.70688	0	4.26086	0	4.96397	0	0	0
10:81179544|81179796	0	0	0	0	0	0	1.77735	0	0	0	0	0
10:81308948|81309247	0	0	0	0	0	1.00654	0	0	1.88711	0	0	0
10:81532396|81533406	0.989951	2.1367	0	0	0	4.06985	3.57362	1.1831	0	2.02007	1.48525	2.58145
10:82368571|82368958	2.1581	0	4.34278	0	1.66654	1.97812	2.76741	0	0	0.775693	6.75604	0
10:82368571|82383844	2.04016	4.60541	8.22423	0	5.41207	4.49907	2.91096	0	0	7.29706	7.77637	0
10:82728253|82734481	0	0	0	0	0	0	0	1.29558	0	0	1.22677	0
10:82728253|82739265	0	0	0	0	0	0	0	2.51798	0	0	0	0
10:82732603|82739265	0	0	0	0	0	2.66303	0	0	0	0	0	0
10:82751384|82761913	1.02008	0	0	0	0	0	0	0	0	3.44235	0	1.79277
10:82752407|82761913	1.70013	0	0	0	0	1.66661	0	0	0	1.02464	0	0
10:82754965|82761913	0	0	0	1.87672	0	0	0	0	0	0	0	0
10:82883914|82885293	0	3.50531	0	0	0	1.04655	1.29559	0	2.19866	3.35044	0	1.31542
10:8298056|8307487	0	1.82971	0	0	1.84595	0	0	0	0	0	0	0
10:8298056|8330223	0	0	0	0	1.99505	0	0	0	1.88186	0.997167	0	0
10:8298056|8390931	0	0	0	0	0	0	0	0	0	0	0	1.0642
10:83254783|83256142	6.89013	3.83949	11.558	5.11175	5.96326	6.90392	11.611	6.47657	12.2349	11.3752	12.8579	9.60051
10:83254783|83283869	0	7.1348	4.26023	1.9604	2.92653	0	9.33026	9.55903	9.59564	11.0418	6.01558	2.48309
10:83281370|83283869	0	0	0	3.51976	3.89538	0	2.27464	0	2.14954	0	4.08719	1.06062
10:83281370|83297300	0	0	0	0.932026	1.53829	0	1.89161	0	0	0	0	0
10:83281370|83304375	0	5.43193	5.48735	1.24132	0	4.77494	8.83447	7.77162	6.27606	10.0687	11.6338	4.44576
10:83297154|83304375	3.54423	4.57632	8.60255	3.22323	4.95852	2.33015	6.04113	2.94526	5.93831	7.61934	1.48149	2.56243
10:83297154|83313522	0	1.56802	0	0	0	0	0	0	0	0	0	0
10:8330068|8390931	1.2408	0	0.963944	0	0	0	0	0	0	0	0	0
10:83316055|83316789	0	0	0	0	0	0	2.84078	0	0	1.668	1.17239	0
10:83506598|83512437	0	2.54594	0	0	0	0	0	0	0	0	0	0.710663
10:83558598|83564537	0	0	0	0	0	0	0	0	0	0	0.875618	0
10:83569968|83574559	0	0	0	0	0	0.731804	0	0	0	0	0	0
10:84947412|84948020	0	0	3.85269	4.55047	5.01842	6.68193	8.79991	3.66059	9.12664	7.43424	2.96523	5.91953
10:84958016|84970824	0	0	0	0	0	0	0	1.98015	0	0	0	0
10:84969863|84980192	0	0	1.61538	0	0	0	0	0	0	0	0	0
10:84980048|84992264	0	0	0	0	0	0	0	0	0	0	2.92168	0
10:84992120|85001901	0	0	0	0	0	0	1.57285	0	0	0	0	0
10:85143016|85157194	0	1.26306	0	0	0	0	0	0	0	0	0	0
10:85146344|85148798	0	0	1.92789	2.70569	0	0	0	0	0	0	0.608943	0
10:85949466|85953504	0	0	0	0	0	0.665756	0	0	0	0	0	0
10:86024416|86024710	0	0	0	0	0	0	0	2.15724	0	0	2.529	1.41897
10:86692386|86695737	0	0	0	0	0	0	0	0	0	0	0	2.30166
10:86693914|86694159	0	0	0	0.624883	0	0	0	0	0	0	0	0
10:86702909|86704396	0	0	0	0	1.66493	0	0	0	0	0	0	0
10:86804781|86812380	0	0	0.965015	1.86827	0	0	0	0	2.32603	4.61169	0	0
10:86804781|86817090	0	0	1.28633	0	0	0	0	0	0	0	0	0
10:86873824|86878949	0	0.966864	0	0	1.53829	0	0	0	1.56822	0	0	0
10:86875480|86878949	0	0	0	0	0	0	0	0	0	0	0	5.5376
10:86891605|86896693	0	0	0	1.25494	0	0	0	0	0	0	0	0
10:86940619|86947292	0	1.2923	3.07452	0	0	0	0	0	0.77796	0	0	1.77732
10:86949887|86960317	0	0	0	0	0	0	1.26366	0	0	0	0	0
10:86958359|86969379	0	0	0	0	0	1.20705	0	0	0	0	0	0
10:86969183|86980000	0	0	0.826716	0	1.26064	0.665756	0	0	0	1.99212	0	0
10:87528299|87538325	0	2.75384	3.6474	5.92767	0	0	0	0	1.91442	0	1.75221	1.41416
10:87528299|87554434	0	0.609904	0	0	0	0	0	0	0	0	0	0
10:87538142|87538325	0	0	0	1.55243	0	0	2.04717	0	0	0	0	0
10:87538142|87554434	0	0	0	0	0	0	2.23002	1.43816	0	0	0	1.82326
10:87538142|87563469	0	0	0	0	0	0	0	0	0	0	0	2.24864
10:87538142|87567470	0	0	0	0	2.02827	0	0	0	0	0	0	0
10:87567274|87581963	0	0	0	0	0	0	0	1.07982	0	0	0	0
10:87576157|87578986	3.38961	0	2.83785	5.20753	2.80389	0	6.37121	4.47131	8.04971	10.1809	5.76901	0
10:8780519|8789601	4.11924	3.98284	7.30956	5.2155	7.75104	6.10433	5.24443	8.0862	5.73592	2.35775	4.57434	4.51843
10:8780519|8814457	0	3.7201	4.83439	0	0	5.80036	0	3.44482	5.56999	7.59871	5.26331	0
10:8780519|8850491	0	0	0	0	0	0	0	0	1.04791	0	0	0
10:8784198|8814457	0	0	0	0	0	0	0	0	0.627288	0	0	0
10:87859331|87864887	0	1.8328	0	0	0	0	0	0	0	0	0	0
10:87859331|87913800	0	0	0	0	0	0	0	1.44177	0	0	0	0
10:87861296|87913800	0	0	0	0	0	0	0	1.1533	0	0	0	0
10:87864731|87913800	0.702251	0.610921	0	0	0	0	0.71816	0	0	0	0	0
10:87864731|87915349	0	0	0	0	0.659601	0	0	0	0	2.99602	0	0
10:88110299|88126327	2.11683	0	0	0	0	0	0	0	1.07844	0	0	0
10:8814241|8814457	0	0	0	0	0	1.34501	0	0	0	0	0	0
10:8814241|8850491	0.687089	0	0	0	0	0	0	0	0	0	2.05614	1.12828
10:88213647|88219360	3.06024	0	0	0	0	0	1.11289	0	2.83439	0	1.16749	0
10:88400652|88414598	1.89591	3.18902	4.55656	1.86198	2.77205	0	0	0	0	0	0.882575	1.82992
10:88400652|88419560	0	0.923071	0	0	0.860712	0	0	0	0	0	0	1.76888
10:88411916|88419560	0.680054	2.14081	2.26334	0.633502	1.85432	1.336	1.89908	0	0	3.04314	0.882507	2.35964
10:88488382|88489728	0	0	0	0	0	0	0	0	1.28872	1.5686	0	0
10:88733543|88737202	0.685876	0	0	0	0	0.665756	0	0	0	0	0	1.77128
10:88735898|88737202	1.36011	1.11493	0	0	0	6.86641	3.96538	13.1227	6.09656	11.015	0	2.72483
10:88809082|88810085	5.15779	16.0869	16.4772	10.9892	6.12063	7.4564	12.6752	12.6109	12.4282	12.0646	12.3486	17.714
10:89417020|89431052	0	0.610921	0	0	0	0	0	0	0	0	0	0
10:89426408|89431052	0	0	0	0	0	0	0	0	0.627288	0	0	0
10:89473752|89478876	1.02935	4.1449	3.85899	0	2.15464	0	2.30206	3.85616	0	2.9927	5.87071	1.66627
10:89473752|89478881	1.36011	0.921038	0	2.56575	1.35313	2.04814	0	0	1.35591	1.32808	0	3.18539
10:89473752|89480627	0	0	0	0	0	0	0.986281	1.81499	0	0	0	2.1236
10:89473752|89483524	102.937	138.526	111.012	106.751	103.367	132.44	109.049	90.509	143.487	131.533	95.3034	85.5015
10:89473752|89498417	4.89484	3.05054	3.6616	0.620661	2.1567	5.34514	1.57603	0	1.74859	3.41578	1.75124	1.94149
10:89473752|89516571	1.36124	3.01969	0.969446	0	0	0	1.57285	0	1.25458	0	1.77306	2.34318
10:89478350|89478881	0	0	0	0	0	0	0	0	0	0	0.952977	0
10:89478350|89483524	0	0	0	1.55165	0	1.6655	0	0	0	0	0.875618	0
10:89478778|89483524	0	0	0	0.73183	0	0	0	0	0	0	0	0
10:89645462|89645743	0	0	0	0	0	1.00087	0	0	0	0	0	0
10:89649965|89654226	0	0	0.6437	0	0	0	0	0	0	0	0	0
10:89666717|89669802	0	1.01887	0	0	0	0	0	0	0	0.665147	0	0
10:89669645|89678482	0	0	0	0	0	1.67342	0	0	0	0	0	0
10:89726637|89729017	0.767894	0	0	0	0	1.47526	0	0	0	0	1.16945	0
10:89772587|89776030	0	0	0.97709	0	0	0	0	0	0	0	0	0.710663
10:89772587|89781267	0	0	0	0	0	0	0	0	0	1.32808	0	0
10:89772587|89791481	0	0	0	0	2.2503	0	0	0	1.88835	0	0	0
10:89772587|89794624	1.36011	0	0	0	0	1.68487	0	0	0	1.43202	0	1.74618
10:89774080|89787285	0	0	0	0	1.58158	1.08451	0	0	1.03122	0	0	0
10:89775939|89787285	0	0	0.6437	0	0	1.79693	0	0	0	0	0	0
10:89779835|89791481	0	0	0.642629	0	0	0	0	0	0	0	0	0
10:89787105|89789381	0	0.656462	0	0	0	0	0	0	0	0	0.753625	0
10:89787105|89791481	0	3.39165	0	0	0	0	0	0	0	0	0	0
10:89787105|89794624	3.88441	5.85195	9.07032	8.42031	14.1094	3.4298	7.49556	2.87872	7.12181	9.17065	8.40193	3.09807
10:91151709|91158845	0	0	0	0.649895	0	0	0	0	0	0	1.75124	0
10:93208172|93212075	0	0	0	0	0	0	0	0	0	1.71373	0	0
10:93208172|93216476	0	0	0	0	0	2.10692	0	0	0	0	0	0
10:93208172|93218089	0	3.76203	0	0	1.24012	0	0	1.91626	0	4.64939	0	0
10:93208172|93239043	0	0.915873	0	0	0	0	0	0	0	0	0	0
10:93221587|93239043	0	0	2.376	0	0	0	0	0	0	0	0	0
10:93235438|93236963	25.2146	24.5384	27.0862	23.1769	23.8429	33.5704	23.0273	38.5949	32.7585	42.6061	33.3949	26.3926
10:93497582|93500673	0	0	1.92896	0	0	0	0	0	0	0	0	0
10:93531478|93534665	0	0	0	0	0	0	0	0	0	0	0	4.62769
10:93707278|93710666	0	0	0	0	0	0	0	0	0	0	2.04505	0
10:93862377|93868961	2.38132	0	0	0	0	2.33237	0	0	0	0	0	0.843306
10:93865407|93871649	0	0	0	0	0	0	0	0	2.5102	0	0	0
10:93973835|93974545	0	0	0	0	0	0	0	0	0	1.00058	0	0
10:93980314|93997113	0	0	0	0	0	0	0	0	0.941977	0	0	0
10:94043302|94045633	2.74605	1.21981	3.86443	0	1.65629	1.43124	2.51865	2.88725	1.88186	5.38807	2.62783	3.1866
10:94089577|94089762	0	18.4365	0	0	0	18.1209	18.6884	19.2455	0	24.2209	0	0
10:94089577|94103398	0	0.997877	0	0	0	0	0	0	0	2.41102	0	0
10:94100402|94106072	2.38245	0	0	0.623806	0	0	2.83324	1.80863	0	0	0	0
10:94100402|94120503	0	0	0	0	0	0	0	0	0	0	0	2.47596
10:94120453|94125632	0	0	0	0	0	0	0	1.43816	0	0	0	0
10:94124890|94135119	0	0	0	0	0	0	0	0	0	0	1.45936	0
10:94165418|94167728	0	0	0	0	0	0	0	0	0	1.3314	0	0
10:94167410|94167728	0	0	0	0	0	0	0	0	1.88186	0	0	0
10:94578423|94582409	0	0	0	0	0	1.33262	0	0	0	0	0	0
10:94718852|94728722	1.36813	0	0	1.33646	2.47892	0	0	2.15724	0	0	0	0
10:94740057|94750659	0	0	0	0	0	0	0	0	0.941977	0	0	0
10:94748941|94750659	0	5.22343	10.8185	8.02371	7.54468	12.0291	8.06332	3.78408	13.4211	5.1196	0	8.5971
10:94810665|94813300	0	0	0	0	0.711628	0	4.57323	0	0	1.05339	2.11229	0
10:94864717|94866998	0	0	0	0	0	0	0	0	0	2.00567	0	0
10:94864717|94871119	0	2.91998	0	0	0	0.6691	0	0	0	0	0	0
10:94864717|94882632	0	0.914856	0	0	0	0	0	0	0	0.66404	0	0
10:94906465|94922770	0	0	2.0891	0	0	1.82622	1.90017	0	2.92379	0	0	0
10:95989562|95990465	0	2.15449	0	2.51932	2.46229	0	2.05196	5.12751	1.89667	2.37862	4.11211	3.35797
10:95989562|95995690	0	2.43962	0	0	0.628048	2.1522	4.41246	0	1.9832	3.04812	3.5054	0
10:95990255|95990465	0	0	0	0	0	0	0	0	0	1.05921	0	0
10:96002887|96013425	0	0	0	0	0	0	1.33584	0	0	0.66404	0	0
10:96028393|96031693	0	0	0	0	0	0	0.944757	0	0	0	0	0
10:9778021|9789428	0	0	0	0	0	0	0	1.45304	0	0	0	0
10:9789363|9800068	0	0	0	1.3395	0	0	0	0	0	0	0	0
10:9798122|9800068	6.76644	15.4224	16.2252	15.7426	14.6978	9.72845	8.90738	9.63059	15.2749	8.30509	16.4816	11.0386
10:98968694|98969124	0	0	0.743215	0	0	1.86624	0	0	1.25458	2.88402	0	0
10:98991062|98994807	1.36011	0.920022	0	0	1.53829	0	1.27112	0	0	0	1.45936	0
10:99124831|99129662	0	0	1.66538	0	0	0	2.20727	0	2.30003	4.49607	0	0
10:99124831|99156351	0	0	1.61304	0	0	0	0	0	0	0	0	0
10:99144235|99164949	0	0	0	0	0	0	0	0	0.627288	0	0	0
11:100378089|100379625	0	0	0	0	0	0	0	0	0	0	1.7749	1.45805
11:100383007|100383654	0	0	1.46244	0	0	0	0	0	0	0	0	0
11:100492505|100495964	0	0	0	0	1.45625	0	0	0	0	0	0	0
11:100495860|100498762	0	1.21981	0	0	0	0	0	0	0	0	0	0
11:100495860|100516906	0	1.52578	0	0	0	0	0	0	0	0	0	0
11:100498185|100498762	0	0	0	0	0	0	0	0	0.631512	0	0	0
11:100498185|100505009	0	0	0	0	0	0	0	0	0.941977	0	0	0
11:100504203|100505009	0	0	0	0	0	0	0	2.15964	0	0	0.98051	0
11:100504203|100516906	0	1.23687	0	0	0	0	0	0	0	2.65616	2.04408	0
11:100504855|100516906	0	0.610921	0	0	0	0	0	0	0	0	0	0
11:100512876|100516906	0	4.26933	0	0	1.98499	0	0	0	1.82477	0	0.647298	0
11:100583594|100585055	0	0	0	0	0	1.02058	0	0	0	0	0	0
11:100589898|100591565	0	0	0	0	0	0	0	0	0.945199	0	0	0
11:100589898|100596240	0	0	0	0	0	0	0.649076	0	0	0	0	0
11:100589898|100598728	0	0	0	0	0.988281	0	0	0	0	0	0	0
11:100590887|100598728	0	0	0	0	0	0	0	0	0.943023	0	0	3.37562
11:100592855|100596240	0	0	0	0	2.28972	0	0	0	3.18495	0	0	0
11:100804870|100808533	0	0	0	1.55165	0	0	0	0	0	0	0	0
11:100893074|100898823	0	0	0	0	0	0	1.63229	0	0	0	1.83847	0
11:101055026|101055605	0	0	2.65352	0	0	0	0	0	0	0	0.875618	0
11:101216995|101218720	0	0	0	0	0	0.998635	0	0	0	0	0	0
11:101294966|101296316	0	0	0	0	1.54034	0	0	0	0	0	0	0
11:101294966|101299076	0	1.88717	0	0	0	0	0	0	0	0	0	3.3323
11:101294970|101299076	0	4.76378	7.63301	4.94037	0	6.32294	8.64611	2.16817	11.2918	12.5679	3.85276	6.41887
11:101295035|101299076	0	0	0	4.36638	0	1.33151	1.3579	1.89558	3.40975	0.665147	1.46034	1.7677
11:101370706|101374705	2.479	4.07597	8.03726	0	2.82277	0	8.94966	0	6.10643	3.7283	5.25328	5.6991
11:101553988|101556291	0	0	0	0	0	1.6712	0	0	0	0	0	0
11:101555810|101556291	0	0	1.69969	0	0	0.998635	0	0	0	0	0	0
11:101559519|101564826	0	0.614012	0	0	0	0	0	0	0	0	0	0
11:101568399|101573177	0.771489	0	2.2492	0	0	0	0	0	0	0	0	0
11:101577194|101578037	0	0	0	0	0	0	0	0	2.10834	0	0	0
11:101588853|101589141	0	0	0	0	0	0	0	2.08306	0	0	0	0
11:101743076|101750066	0	0	0	0	0	0	0.637641	0	1.53148	0	0	0
11:101749885|101757748	0	0	0.645886	0	0	0	0	0	0	0	0	0
11:102293067|102293941	0	0	0	0	1.23372	0	0	0	0	0	0	0
11:102310191|102310576	0	0	0	0	0	2.71572	0	0	0	0.717674	0	3.29405
11:102487500|102508211	0	0	0	0	0	0	0	0	0	0	0	0.75311
11:103043168|103046523	0	0	0	0	0	0	0	0	0.785736	0	0	0
11:103046379|103052324	0	0	0	0	0	0	0	0	0	0	1.17438	0
11:103046379|103055289	27.9716	23.9341	20.8379	27.1978	24.3635	27.6872	18.2367	22.5162	30.3799	25.1677	34.958	14.5288
11:103046379|103056499	0	0	3.4745	0	0	0	0	0	2.19551	1.00279	0	3.49128
11:103046379|103060248	0	0	0	0	0	0	0	0	0	0.665147	0	0
11:103055198|103056499	0	1.21247	0.965015	0	2.15566	0	0	0	0	0	0	0
11:103055198|103060248	0	0	0	0	0	0	0	0	0.627288	0	0	0
11:103063808|103064867	0	0	0	0	0	2.3369	0	0	0	0	0	0
11:103185621|103186706	0	0	0	0	0	0	0	0	0	1.00396	0	0
11:103337725|103340404	0	1.55648	0	0	0	0	0	0	0	0	0	0
11:103386958|103387348	0	0	0	0	0	0	0	0	0	2.31395	2.10019	0.805951
11:103683792|103687633	0	0	0	0	0	0	0	0	0	0	2.11911	0
11:103683792|103689319	0	0	0	0	3.07659	1.33826	0	1.17879	1.99942	1.32808	0	2.54982
11:103858895|103863334	0	1.22184	0	0	0	0	0	0	1.56927	0.99606	2.25317	0
11:103858895|103873310	0	0	0	1.11239	0	0	0	0	0	0	0	0
11:103872159|103873310	0	0	0	0	0	0	0	0	0	0	0.877564	0
11:104350487|104368778	0	0	1.92789	0	1.55179	0	0	0	0	0	0	1.98199
11:104350487|104378826	0	2.13467	0	1.55165	2.27277	7.5298	0	4.09417	0	0	0	4.62243
11:104356684|104378826	0.685813	2.81199	3.24376	5.53291	1.85122	2.72395	0	1.73286	0	2.32525	0	0.708258
11:104368680|104369563	0	0	0	0	0	2.27413	0	0	0	3.3091	0	0
11:104368680|104378826	16.2507	16.3858	27.0029	24.8528	17.7196	22.8615	16.5491	16.3968	20.2165	20.2215	13.7133	9.27017
11:104423922|104425293	3.1196	3.71347	2.93256	3.11489	5.85073	6.3494	2.20199	1.08226	3.45217	3.98868	6.45216	1.41416
11:104512901|104521588	0	0	0	0	0	0	0	0	0	0.66404	0	0
11:104522723|104526977	1.70127	0	0	0	0	0	0	0	0	5.08032	0	1.41653
11:104526051|104526977	0	7.13181	1.29174	2.54816	0.621554	4.52516	3.53636	0	3.22612	2.449	0	2.47271
11:104526051|104529438	2.38132	0	3.5366	0	3.13663	3.69789	0	0	0	1.66913	0	0
11:104528263|104528732	0	0	0	0	1.94083	0	0	1.43816	0	1.99212	1.16944	3.53658
11:104658723|104662448	0	0	0	0	4.00678	0	0	0	0	0	0	0
11:105207380|105210640	0	2.34078	0	0.930991	0	0	0	0	1.72022	0	0	2.87732
11:105207380|105221353	0	0.914856	0	0	1.23063	0	0	0	0	0	0	0
11:105221186|105241661	0	0	3.9374	1.24132	0.615317	0	0	0	0	0	0	0
11:105221186|105247595	0	0	0	0	0	0	0	0	2.99187	0	0	0
11:105240361|105241661	10.9584	14.1737	13.9181	10.3952	9.78602	19.7699	12.411	14.5995	15.5255	24.2307	14.3738	11.5422
11:105240361|105247595	4.98565	2.8022	2.25353	5.76007	6.97815	5.882	9.26673	0	8.21818	1.81795	5.70765	2.82832
11:105240361|105249637	0	0	0	0	0	0	5.4236	0	0	1.94928	0.608943	0
11:105240361|105260352	0	0	0	0	0	0	0	0	1.25773	0	0	0
11:105241569|105247595	0	0	0	0	0	0	0	0	0.631555	0	1.41485	0
11:105241569|105249637	0	0	0	0	0	0	1.41328	0	0	0	0	0
11:105246774|105247595	0	0	0	0	0.922976	0	4.05957	0	0	0.66404	3.62958	0
11:105246774|105249637	0	0	0	0	0	0	0	0	0	0	0	0.70708
11:105246774|105256951	0	0	0	0	0	0	0	0	0	0	0	1.23803
11:105246774|105260352	0	0	0	0	0	0	0	0	0	0	0	1.41774
11:105253291|105260352	2.09737	0	0	0	0	0	0	0	0	0	0	0
11:105253291|105271237	0	0	1.60657	0	0	0	0	0	0	0	0	0
11:105256870|105271237	2.06952	0	0	0	0	0	0	0	0	0	0	0
11:106096991|106114283	1.7024	3.06517	2.8929	0.752405	0	3.99454	2.77538	1.09704	1.2588	3.11862	0	1.41416
11:106096991|106117603	1.15501	4.25424	0	1.02917	2.84393	2.63317	1.88742	0	0	0	0	0
11:106096991|106123906	3.52461	5.56815	4.3974	4.62859	2.18776	8.79222	5.1339	0	4.089	7.67938	0	1.41534
11:106110744|106123906	1.43751	0	0	1.24654	1.23166	0	4.09901	2.16817	1.75051	0.997167	0	1.41534
11:106114184|106114689	0	0	0	0	0	0	0	0	0	0	1.76123	0
11:106114184|106117603	0	0	0	0	0	3.21123	0	1.82644	0	0	0	0
11:106117490|106123906	0	0	5.02052	2.89827	3.38527	0	2.16674	5.07065	0.940932	5.58473	2.38085	1.85926
11:106203538|106205461	5.06599	1.47061	0	0	0	0	0	6.46768	0	0	0	0
11:106204921|106213361	2.04016	0	0	0	0	0	0	0	0	0	0	0
11:106208006|106208316	0	0	0	0	0	0	0	0	0.628333	0	0	0
11:106208006|106211780	1.36011	0	0	0	0	0	0	0	1.63346	0	0	0
11:106208006|106213361	0	2.43962	0	0	0	0	0	0	0	0	0	0
11:106224081|106224934	0	0	0.732489	0	0	0	0	0	0	0	1.75221	0
11:106224081|106228824	0	0	0	0	0	1.04585	0	0	0	0	0	0
11:106230330|106235783	0	0	0	2.89521	0	0	0	0	0	0	0	0
11:106234852|106240099	0	0	0	0	1.23687	0	0	0	0	0	0	0
11:106236995|106240099	0	0	3.05649	4.24701	0	5.0535	0	5.09827	3.39183	0	0	3.54016
11:106240002|106241827	0	0	0	0	1.85014	2.40801	1.5739	0	0	0	0	0.7167
11:106380667|106382546	0	0	1.29503	0	0	0	0	1.43816	0	0	0.586703	0
11:106408060|106411814	0	0	0	0	0	1.01482	0	0	0	1.32919	0	0
11:106409895|106418989	1.51751	0.924129	3.21407	0	0	2.35104	3.46237	0	0.715002	0	4.97071	2.58509
11:106411623|106414469	0	0	0	1.55372	0	0	0	0	2.1976	0	0	0
11:106413474|106414469	0	1.38325	0	0	0	0	0	0	0	2.67218	0	0
11:106414351|106420097	0	4.68208	0	0	0	0	0	0	0	0.66736	0	1.98819
11:106418824|106423488	0	0	0	0	0	0	3.14674	0	0	0	0	0
11:106421706|106423488	22.908	31.4928	18.8934	17.2496	20.4988	17.1478	27.0515	19.8828	19.7794	19.4159	14.6507	18.7038
11:106423387|106434987	0	0	0	0	0	0	0	0	3.5877	0	0.586703	0
11:106423387|106437123	0	0	0	0	1.27761	2.58551	0	0	1.30807	0	2.36647	0
11:106426813|106434987	0	0.685512	0	0	0	0	0	0	0	0	0	0
11:106426813|106437123	2.75225	1.84208	3.75526	0	1.89467	5.27017	2.51655	0	3.46996	1.66121	1.17749	2.89948
11:106434915|106437123	0	0	0	0	1.29448	0	1.13613	0	1.02057	0	6.95457	1.78863
11:106434915|106459028	0	0	0	0	0	1.73655	0	0	0	0	0	0
11:106529262|106534017	0	0	0	0	0	1.336	1.70427	0	0	1.32808	1.16944	1.41416
11:106544172|106548914	0	0	1.92789	0	0.922976	0	0	0	0	1.96064	0	2.47478
11:106566965|106568627	0	0	0	0	0	0	0	0	0	2.34139	0	0
11:106679549|106685248	1.70127	0	2.60454	1.88637	0	3.32989	1.88846	0	1.57884	0	2.33693	3.93066
11:106754782|106755051	1.70353	4.4653	2.64726	3.26192	6.19144	4.22537	4.77489	0	0	4.81879	3.57369	4.29345
11:106772652|106775600	0	0	1.61322	0	0	0	0	0	0	0	0	0
11:106784414|106785052	0	0	0	0.623806	0	0	0	0	0	0	0	0
11:106784880|106786544	0	0	0	0	0	0.665756	0	0	0	0	0	0
11:106790731|106812535	1.36124	0	0	0	0	0	0	0	0	0	0	0
11:106809192|106809757	0	0	0	0	0	0	0	0	0	0	0.875618	0
11:106841600|106856264	0	0	1.60657	0	0	0	0	0	0	0	0	0
11:106845983|106852649	0	0	0	0	0	1.35512	0	0	0	0.999425	0	0
11:106845983|106856264	0.680054	0	3.58883	2.48579	0	2.33126	1.88742	0	0	4.31737	0	4.30131
11:106845983|106875939	0	0	0	1.45951	0	0	0	0	0	0	0	0
11:106849748|106856264	0	0	0	0	0	0	0	1.42406	2.62489	0	0	0
11:106849748|106864777	1.02121	0	0	0	0	0	0	0	0	0	0	0
11:106852447|106856264	0	0	0	0	2.56848	0	0	0	0	0	0	0
11:106856181|106856997	0	0	0	1.12	0	0	0	0	0	0	0	0
11:106859712|106868668	0	0	0	0	0	1.68126	0	0	0	0	0	0
11:107061684|107062782	0.858653	0	3.5366	0	0	1.66439	0	0	0	1.15501	1.19269	1.56425
11:107080723|107082700	0	0	0	1.55796	0	0	0	0	0	0	0	0
11:107095002|107095925	0	0	0	0	0.615317	0	0	0	1.56822	0	0	0
11:107095002|107099789	0	0	0	0	0	2.00513	1.26356	0	0	2.61616	0	0
11:107095716|107099789	0	0	0	0	0	0	1.26465	0	0	0	0	0
11:107110813|107111635	0	3.11033	2.5868	0	0	0.725229	4.71054	2.15724	6.40488	7.73442	0	0
11:107176783|107181883	0	0	0	0.622744	0	0	0	0	0	0	0	0
11:107296199|107321675	0	0	0	0	0	1.07754	0	0	0	0	0	0
11:107296199|107337560	1.36011	3.32613	4.28669	0	1.73578	2.4517	1.31192	2.3766	0	0	0	1.83042
11:107332412|107337560	0	0	0	0	0	0	0.631236	0	0	0	0	0
11:107486414|107489072	0	0	0	1.24339	0	0.665756	0	0	0	0	0	0
11:107574938|107577899	0	0	0	1.83255	0	0	0	0	0	0	0	0
11:107592706|107595195	2.50743	1.98446	1.94412	0	1.53932	4.02566	1.45841	4.3229	1.32786	5.09864	6.14756	3.20263
11:107592706|107604363	1.44441	2.44991	3.21752	2.198	0.888364	3.32195	0	1.07862	2.28265	0.674275	0	0
11:107592706|107620214	0	0	0	0	0	1.19597	0	0	0	3.24935	0	0
11:107599150|107603043	0	0	0	0	0	0.666866	0	0	0	0	0	0
11:107632172|107635098	0	0	0	0	0	0	0	0	1.25562	0	0	0
11:107632172|107649340	0	0	0	0	0	0.665756	0	0	0	0	0	0
11:107646050|107649340	0	0	0	1.59099	0	0	0	0	0	0	2.20175	0
11:107656044|107661146	0	0	0	0	0	0	0	0	0	2.32414	0	0
11:107663608|107666078	1.52872	0	0	0	0	0	0	0	1.88186	0	0	0
11:107978234|107986385	1.62294	0	0	0	0	0	0	0	0	0	0	0
11:108012627|108014381	0	0.651327	0	0	0	0	0	0	0	0	0	0
11:108053975|108057873	0	0	0	0.620661	0	0	1.48405	0	0	0	0	0
11:108053975|108192212	0	0	0	0	0	0	0	0	0.943023	0	0	0
11:108434126|108440596	0.723191	0.916903	0	0	0	0	0	0	1.31781	0	0	2.21409
11:108518679|108523378	0	0	0	0	0	0	0	0	0	0	1.23247	0
11:108518679|108531465	1.10068	0	0	2.3636	0	1.99838	0	0	0	0	2.87467	0
11:108523319|108531465	0	0	0	0.620661	0	0	0	0	0	0	0	0
11:108523319|108570423	0	0	0	0	0	0.998635	0	0	0	0	0	0
11:108591004|108606395	0	0	0	0.99554	0	0	1.25933	1.43816	0	0	0	0
11:108664496|108690431	1.02008	0	0	0	0	0	0	0	0	0	0	0
11:108792122|108808739	0	0	0	0.623806	0	0	0	0	0	0	0	0
11:108923152|108931579	0	0	0	0	0	0	0	1.07862	0	1.31514	1.16749	0
11:109458477|109463548	0	0	0	0	0	0	1.28396	0	0	0	0	0
11:109548014|109563272	0	0	2.82913	0	0	0	1.66776	0	0	0	0	0
11:109661288|109663107	0	0	0	0	0.924001	0	0	0	0	0	0	0
11:109662949|109665986	0	0	0.801696	0	0	0	0	0	0	0	0	0
11:109682837|109685527	0	6.91838	0	1.24447	1.53932	0	0	0	0	2.65837	0	4.40524
11:109940812|109942357	0	0.634595	0	1.27604	0	0	0.947945	0	0	0	0	0
11:109952553|109955201	0	0	0	0	0	0	0	1.13351	0	0	0	0
11:109961794|109965031	0	0	2.32428	0	0	0	0	2.51798	0	0	3.4069	0
11:109974990|109977873	0	0	0	1.26347	0	0	0	0	0	0	0	0
11:110106524|110107584	0	0	0	0	3.08386	0	0	2.94307	0	0	0	0.903896
11:110214112|110220188	0	3.39786	0.963944	0	2.88536	0	0	0	3.33004	0	0.644455	0
11:110230489|110233842	7.24664	12.3543	12.1831	11.8353	11.0881	17.2317	6.90881	9.87028	6.39485	7.77369	16.8644	3.64966
11:110230489|110236796	0	0	0	0	0	0.999744	0	0	0	0	0.583745	0
11:110241535|110245321	0	1.84544	0	0	0	0	0	0	0.945114	1.81217	0	0
11:110326560|110329256	0	1.83278	0	0	0	0	0	0	0	0	0	0
11:113523466|113562124	0	0	0	0	3.23786	0	0	0	0	0	0	0
11:113559511|113591932	0	3.96849	1.72802	0	3.29992	0	0	0	0	0	1.75221	0
11:114707336|114711838	0	0	1.67269	0	1.67227	0	0	0	2.02024	0	1.23687	0
11:114708417|114708861	5.1427	0	2.79694	0	2.68562	1.09907	4.29023	4.67278	6.98764	0	3.12516	0
11:114710043|114711838	0	0	0	0.62484	0	0	0	0	1.10567	0	1.75419	0
11:114863467|114868645	1.70358	0	0	0	0	0	0	0	0	0	0	0
11:114893238|114897819	0.727206	0	0	2.80344	0	0	0	1.84293	0	0	0	0
11:114893460|114897819	0	0	0	0.930991	0	0	0	0	0	0	0	0
11:115925407|115927434	0	0.610921	0	0	0	0	0.642155	0	0	0	0	0
11:115925407|115928486	0	0.917947	0	0	0	0	0	0	0	0	0	0
11:115925407|115930798	0	0.915873	0	0	0	0	0	0	0	0	0	0
11:116160062|116163359	2.82204	0	4.80161	3.96782	0	0	6.14454	0	0	3.2471	0	0
11:116180943|116182020	10.9185	5.61015	8.45824	8.45593	7.7172	8.01152	9.10032	13.7412	8.97887	14.0756	16.8335	9.26892
11:116180943|116183551	0	0	0	0	0	0	0	0	1.28445	0	0	0
11:116180943|116183624	2.78916	5.31168	2.57816	0	2.44716	1.69253	3.79505	5.79104	3.79416	2.66289	6.07383	4.61996
11:116189415|116189575	49.467	64.505	48.1242	45.5698	41.8515	49.667	57.6454	64.4404	73.9798	70.5326	60.9518	70.7309
11:116250736|116252793	0	0	0	0	0	0	0	0	0	0	0.586703	0
11:116250736|116260934	0	0	0	0.930991	0	0	0	0	0	0	0	0
11:116250736|116261827	1.47609	0	3.21315	1.24655	0	0	0	0	0	0	1.03908	0
11:116260794|116268387	0	0	0	0	0	0	0	0	2.59454	0	1.82556	0
11:116261745|116265565	0	0	0	0	0	1.66887	0	0	0	0	0	0
11:116261745|116268387	0	0	0	0	1.23166	3.08176	0	0	0	0	1.17333	0
11:116262860|116263297	11.6286	14.5003	10.6172	11.4676	12.1112	11.7239	8.97684	13.9938	7.66934	8.91919	22.4071	14.6411
11:116262860|116265552	2.08159	0	0	0	0	1.00316	0	0	0	4.41276	2.33498	0
11:116262860|116268387	0	0	0	0	1.84595	2.1227	0	2.2606	2.63448	0	3.2106	3.05407
11:116263215|116268387	0	1.22184	0	0	0	0	0	0	1.88291	0	0	0
11:116265357|116268387	0	0.914856	1.92789	0.98479	1.82565	0	3.92462	0	2.82647	0.687588	1.17045	1.18526
11:116354365|116354795	0.681187	0	0	0	0	0	0	0	0	0	0	0
11:116358669|116362373	0	0	2.57266	0	0	0	0	1.80747	0	1.54496	0	0
11:116472177|116477347	1.02008	1.95299	0	0	1.23166	3.71876	1.88953	2.88113	0	0	2.08003	0
11:116477202|116479824	0	0	0	0	0	0	0	0	1.58304	0	0	0
11:11700205|11707904	0	0	0	41.0041	53.5362	46.7962	40.2384	47.0871	42.7959	56.7016	55.4816	0
11:11700205|11754174	0	0	0	0	0	0	0	1.44425	0	0	0	0
11:117141418|117141793	0	0	0	0	0	0	0	0	0	0	0	2.85698
11:117290398|117291036	8.50213	14.1471	10.5795	10.149	7.29325	8.65523	11.1944	8.3537	12.6119	15.0793	8.29203	5.06878
11:117352607|117359470	0	0	0	0	0	0	0	0	0.629379	0	0	0
11:11748311|11761353	0	2.59755	1.60657	2.33679	0	0	2.20199	0	0	0	0	1.79548
11:11759909|11761353	0	0	1.6778	0	0	0	0	0	0	0	0	0
11:117700725|117714452	0	0	1.61202	0.930991	0.922976	1.66661	1.84952	0	0	2.0165	0	0
11:117700725|117723550	0	0	0	0	0	0	0.99314	0	0	0	0	0
11:117752977|117756106	0	0	0	1.2434	0	0	0	0	0	1.32808	0	0
11:117755331|117756106	0	0	1.37727	1.08487	1.84595	0.666866	0	2.87632	1.88291	0	0	0
11:117812459|117813185	0	0	0	1.58577	0.922976	0	0	0	0	0	0	1.45315
11:117832345|117832576	0	0	0	0	4.19455	0	0	0	0	0	0	0
11:118182220|118182913	0	0	0	0	0.621611	0	0	0	0	0	0	0
11:11819291|11829178	0	0	0	0	0	0	0	0	1.26211	0	0	0
11:118310576|118320209	0	0	0	0	0	0	0	0	0	0	0.876591	0
11:11835742|11846702	0	0	0	0	0	0	0	0	0	2.33087	0	0
11:11835742|11865028	1.02121	0	0	0	0	0	0	0	0	0	0	0
11:11846636|11865028	0	0	1.86393	0	0	0	0	0	0	0	0	0
11:11863651|11865028	0	0	0	1.24774	1.55332	0	0	0	0	0	0	0
11:11863651|11880650	0	0	0	0	0.619503	0	0	0	2.8228	0	0	0
11:119151028|119154075	0	0	1.60764	0	0	0	0	0	6.6816	0	0	4.83865
11:119242427|119243118	0	1.52476	0	0	0	0	0	0	0	0	0	0
11:119276842|119279009	0	0	0	0	0	0	0	0	0	0	0.586703	0
11:119368664|119369265	0.680054	3.48728	2.6869	2.49132	0	0	0	0	4.69668	0	0.959642	0
11:119368664|119370799	0	3.36589	0	0	0	0	0	0	0	0	1.49636	0
11:119423005|119424278	0	1.35967	0	0	0	0	0.635574	1.08835	0	0	1.16846	0
11:119430166|119433628	0	0	0	0	0	0.999744	0	0	0	0	0	0
11:119431588|119435103	0	0	0	0	0	0	0	2.87752	0	0	0	0
11:119433379|119433628	0	0	0	0	0	0	0.639752	0	0	0	0	0
11:119433411|119433628	7.84673	0	0	0	1.32663	0	1.8906	3.84579	0	0	0	0
11:119433411|119435103	0	0	0	0	0.759718	0	0	0	0	0	0	0
11:11943882|11951659	0.680054	0	0	0	0	0	0	0	0	0	0	0
11:119743867|119745119	0	0	0	0	0	0	0	1.4442	0	0	0	0
11:119743867|119756414	0	0	0	0	0	0	0	1.7977	0	0	0	0
11:119743867|119780602	0	0	0	0	0	0	0	0	0	0	0	1.43458
11:119811945|119823021	0	0	0	1.24236	0	0	0	0	0	0.997167	0	0
11:119856267|119857994	0	1.54021	0	0	0	0	0	0	0	0	0	0
11:119957102|119960243	0	0	0	1.38261	0.922976	0	0	0	0	0	1.16846	0
11:119980789|119982126	2.07766	0	0	3.11393	0	1.99727	2.59782	0	0	2.01214	2.91873	0
11:120128423|120134882	0.680054	0	4.89735	0	0	0	3.47302	2.16443	4.70836	0	3.26576	0
11:120132677|120134882	2.90678	0	0	0	0.96726	0	1.56051	0	0	0	0	1.7677
11:120384543|120389439	0	0	0	0	2.02309	0	0	0	0	0	0	0
11:120404206|120409683	0	0	0	0.932026	0	0	0	0	2.5123	0	0	1.07024
11:120404206|120413739	0	0	0	0	0	0	0	0	0.627288	0	0.951018	0
11:120404206|120416380	3.74256	3.40565	0	1.86198	0	0	0	2.94106	4.77651	2.73079	2.33693	2.8295
11:120404206|120428636	1.36011	0	0	1.55165	0.924001	0	0	0	0	0	0	0
11:120408773|120409683	0	2.0333	2.25027	1.27604	3.23466	0	0	1.07862	2.8228	0	4.54495	2.27717
11:120408773|120411744	0	0	0	0	0	0.666866	0	0	0	0	0	1.09569
11:120408773|120413739	0	0	0	0	0	1.33262	0	0	0	0	0	0
11:120409612|120416380	5.49347	3.97158	2.57377	1.24236	10.4062	3.66725	0.630187	3.23706	1.92483	3.70825	2.57537	2.12124
11:120416257|120421541	0	0	0	0	0.620529	0	0	0	0	0	0	0
11:120418245|120433128	0	0	2.71856	0	0	0	0	0	0	0	0	0
11:120421365|120433128	0	0	0	0	0	1.00769	0	0	0	0	0	0
11:120428524|120433128	0	2.36219	0	0	0	0	0	0	0	0	0	0
11:120624490|120624810	0.680054	0	0	0	0	0	0	0	2.50915	0	0	0
11:120624673|120624810	0	0	0	0	0	0	0	0	0.659339	0	0	0
11:120674040|120708709	0	0	0	0	0	5.19151	0	0	0	0	0	0
11:120686644|120689341	0	0	0	0	0.925041	0	0	0	0	0	0	0
11:120967995|120973969	0	0	0	0	0	0.665756	0	0	0	0	0	1.25182
11:121285422|121288078	0	0	0	0	0	2.63695	0	0	0.941977	1.99212	1.21727	0
11:121285422|121290890	2.55518	1.52782	0.647001	1.70177	1.28502	2.06762	4.09255	2.15724	1.88814	4.86	2.33595	0
11:121285422|121298855	0	0	0	1.24549	0	0	0	0	0	0	0	0
11:121298559|121299793	0	1.2342	0	4.42866	0	0	0	0	0	0	0	0
11:121335384|121337070	0	0	0	0	0	0	0	0	0	0.667405	0	0
11:121335384|121338644	0	0	0	0	3.87525	0	0	0	0	0	0	1.29372
11:121335384|121341215	0	0	0	1.65194	0.922976	0	0	0	0	0	1.16945	0
11:121338557|121341215	0	0	0	0	0	0	0	0	0	4.33352	0	0
11:121424926|121426703	3.72262	4.48943	1.92789	0	0	4.77893	0	7.73312	0	8.61835	4.57349	2.92956
11:121496995|121500110	0	1.21981	0.649142	0	0	0.998635	0	1.07862	2.77496	0	1.75419	0
11:121496995|121503787	0	0	0	0	1.53829	0	0	0	0	0	0.606026	2.83305
11:121602988|121605340	0	0	0	0	0	0	1.61747	0	0	0	0	0
11:121639752|121651673	0	0	0	0	1.64556	0	0	0	0	0	0	0
11:12306958|12309752	2.72703	0	0	0	0	0	0	0	0	0	0	0
11:12343744|12365179	0	5.72111	0	0	3.49761	0	0	0	0	6.66458	0	2.32285
11:12365105|12378359	0	0	2.63105	0	1.25171	0	0.943708	0	0	2.22563	2.40955	0
11:12365105|12386766	0	0	0	0	0	0	0	0	0	0	1.16749	0
11:12369594|12386766	0	0	0	1.45004	0	0	0	0	0	0	1.46131	0
11:16858896|16860251	0	0	0	0.930991	0	0	0.669047	0	0	0	0	0
11:16858896|16863080	2.38245	0	4.18035	1.24132	0	1.99949	1.58814	0	3.76582	2.32746	0	3.18304
11:16858896|16883613	0	0	0	0	0	0	0	0	0	1.66121	0	0
11:16862946|16871875	0	0	0.6437	0	0	0	0	0	0	0	0	0
11:16862946|16872936	0	2.172	1.28633	0	3.88027	2.33756	0	0	0	2.97907	6.21421	0
11:16867231|16872936	0	0	2.38177	0	2.07951	0	0	0	0	0	2.11557	0
11:16868108|16871092	0	0	0	1.87568	0	0	0	0	3.76582	1.67314	0	0
11:16869219|16887185	0	0	0	0	0	0	0	0	0	0.99606	0.584718	0
11:16872846|16883613	0	1.52578	0	0	0	1.33262	0	0	0	1.005	0	0
11:16874960|16883613	0	0	0	0	1.62609	1.33262	0	0	1.57136	3.32463	1.46731	0
11:16874960|16887185	0	1.91226	1.34598	1.86198	0	0	5.49481	3.34886	5.47659	2.64779	0	1.77362
11:16874960|16893106	1.71977	0	0	1.24236	1.46835	0	0	2.52039	0	1.6601	1.75124	0.726858
11:16878127|16883613	0	0.915873	0	0.620661	0	0	0	0	0	0	0	0
11:16881464|16883613	37.7022	50.2903	55.6056	44.5534	36.2577	40.3286	50.3348	38.4349	35.4793	47.4286	50.1751	30.1446
11:16881464|16893106	0	0	1.07101	2.34031	0.711628	0	0.943708	1.7168	1.95125	0	2.77599	1.77487
11:16881464|16897079	0	0	0	2.49019	0	0	0	0	0	1.75727	0	2.14902
11:16883456|16893106	0	0	1.28526	0	0	0	0	0	0	0	0	0
11:16889913|16893106	4.01242	6.42666	1.95344	1.91909	2.7741	4.97333	7.82895	3.26672	2.68815	5.32474	2.70242	1.7677
11:16889913|16897079	0	0	0.963944	0	0	0	0	0	0	0	1.75514	0
11:16893008|16897079	0	0	0	0	3.41039	0	0.944757	0	0	0	0.587716	0
11:17192957|17194853	0	0	0.655925	0.930991	0	0	0	0	0	0	0	0
11:17219014|17224650	0	0	0	0	0	0	0	0	0	0	0	0.711841
11:17224549|17228275	0.687089	0	0	0	0	0	0	0	0	0	0	0
11:18905689|18941804	0	0	0	0	0	0	0	0	0	0	0.877564	0
11:19998120|20008477	43.87	42.2992	49.5432	42.3705	27.7943	49.6941	38.7187	26.4194	47.2513	37.6823	41.8011	34.1303
11:19998120|20018189	0	1.83175	0	0	0	0	3.57855	0	0	3.69105	0	2.13705
11:20072456|20080798	1.77988	0	1.68165	0	0	0	0.944757	0	2.34249	0	1.16944	0
11:20077188|20080798	0	0	0	0	0	0	0	2.90616	1.60281	0	1.26668	0
11:20080023|20080798	0	0	0	0	0	0	0.679954	0	0	0	6.19211	0
11:20218813|20223179	4.60853	0	0	0	0	0	0	0	0	0	0	0
11:20692465|20708737	4.65118	0	0	1.86407	1.65297	0	0.629139	0.721477	0	0	0	0
11:20703711|20708737	0	0	0	1.41473	1.03361	0	0	0	1.35666	3.81737	4.57302	0
11:20703711|20709746	0.680054	3.43325	1.95313	2.91462	3.88331	3.9015	0.943708	0.721477	2.19551	1.1306	2.34666	2.12124
11:20703711|20712315	0.68232	1.52476	0	0	0	0	0	0	2.71674	2.05281	0	0
11:20725685|20727639	4.3192	7.64479	3.61462	4.63566	5.14139	5.01429	6.05417	0	1.25458	0	4.08816	3.49417
11:21140564|21142657	0	0	0	0	0	0	0.966018	0	0	0	0	0
11:21263199|21264871	1.44064	4.10219	2.96605	0.939436	4.36519	1.67925	2.20199	0	3.13644	1.72395	1.85878	2.17818
11:21263199|21271738	0	0	2.58253	0	0	0	0	0	0	0	0	0
11:21263199|21275129	0	0	1.02168	0	0	0	0	0	0	0	0	0
11:21263199|21278060	2.72366	3.66357	3.66453	0	1.53932	0.998635	0	0	0	0.997167	0.583745	0
11:21332416|21333810	0.70677	0	3.55495	0	0	0	0	0	0	0	0	0
11:21353349|21354406	4.10529	0	5.55392	0	0	2.33576	4.11277	1.7977	7.1279	0	0	4.50159
11:21652226|21664385	0	0	0	0	0	0	0	0	0	0	0	1.7677
11:21659995|21664385	0	0	2.0328	0	0	0	0	0	0	0	0	0
11:21711462|21724636	0	0	0	0	0	1.83079	0	0	2.29648	0	0	0
11:21711462|21748941	0	0	0	0	0	1.66439	0	0	0	0	0	0
11:22053432|22059261	1.70013	2.86063	3.23583	0	3.09658	1.33151	2.89185	0	5.3648	2.36958	0.587716	1.7677
11:22053432|22068503	1.86576	4.91947	3.6617	4.07503	3.20774	3.66166	5.05347	2.178	4.24911	2.72526	0	0
11:22053432|22068506	9.85063	22.9431	13.9058	6.36536	9.39985	14.8806	9.71976	9.85959	15.7555	5.66224	11.3506	6.96593
11:22151067|22173006	0	0	0	0	0	0	0	0	1.39737	0	0	0
11:22169035|22173006	8.08836	12.5822	10.2783	10.6277	6.91875	11.3429	7.43286	6.50114	8.11609	8.67933	9.72422	12.669
11:22169035|22239238	0	0.914856	0	0	0	0	0	0	0	0	0	0
11:22995930|22996457	0	0	2.57052	1.2455	2.81159	2.38762	4.02774	0	1.56822	5.76782	0	0
11:22995930|22997154	0	0	0	0	0	0	0	0	0.994422	1.75393	0	0
11:22996039|22996314	0	0	0	0	0	0.753618	0	0	0	0	0	0
11:23261835|23271205	3.94871	0	8.89319	5.68878	6.62354	9.86274	3.78331	2.00153	7.82516	7.61046	2.38213	4.00783
11:23261835|23278925	0	0	0	0	0.616343	0	0	0	0	0	0	0
11:23276427|23278925	0	0	1.60657	0	0	0	0	0	2.50915	2.65616	0	0
11:23278143|23278925	0	0	0	0	0	0	0	0	1.25562	0	0	0
11:23278676|23282726	0	0	0	0	0	0	0	0	0	0	2.04704	0
11:23281306|23282726	2.38019	1.53197	4.04574	1.87155	1.24038	0.998635	0	0	2.19551	0	0	0
11:23320661|23333859	0	0	0.642629	0	0	0	0	0	0	0	0	0
11:23333439|23333859	0	0	0.981433	0	0	0.998635	0	0	0	0	0	0
11:23333439|23355098	0.690698	2.13467	0	0	0	0	0	0	0	0	0	0
11:23343320|23355098	2.36477	2.37768	0	0	0	1.33373	0	0	0	3.57385	0	0.767373
11:23351592|23355098	3.64199	3.67258	9.58512	5.59175	0	4.18638	5.01982	0	2.8228	1.33029	7.51749	3.69054
11:23354845|23355098	13.0921	13.9696	14.2712	16.0269	10.5066	16.742	21.1768	0	27.7701	26.4943	22.4505	19.2718
11:23363791|23364512	0	0	0	0	0	2.33126	0	0	0	0	0	0
11:23375001|23381379	0	0	0	0	0.615317	0	0	3.59781	0	0	0	0
11:23377555|23381379	0	0.610921	0	0	0	0	0	0	0	0	0	0
11:23377555|23385172	0	0	0	0	0	0	1.57707	0	0	0	0	0
11:23381225|23382667	0	0	0	0	0	0	0	0	1.57699	0	0	0
11:23382554|23385172	0	0	0	0	0	0	0	0	0	0	0	1.54872
11:23384401|23385739	0	0	0.642629	0	0	0	0	0	0	0	0	0
11:23401453|23405953	0	3.35549	0	2.4081	1.23063	3.35526	0	0	1.57349	0	0	2.15781
11:23414736|23420144	0	0	0	0	0	0	0	0.71908	0	0	0	0
11:23420040|23421366	3.29564	0	0	0	0	2.33607	0.979452	0	1.88819	0	0	0
11:23432246|23436079	0	0	0	0	0	0.675985	0	0	0	0	0	0
11:23438867|23441178	0	0	0	0	0	0	0	0	0	0	0	0.710663
11:23446432|23449293	0	0	0	1.55903	0	0	0	0	0	0	0.877564	0
11:23576731|23584611	0	0	0	0	0	0	0	0	0	1.32919	0	0
11:23593426|23612048	0	0.91792	0	0	0	0	0	0	0	0	0	0
11:23650930|23656130	0	0	0	1.24339	0	0	0	0	0	0	0	0
11:23707523|23717618	1.38192	0	0	0	2.37151	1.42383	0	2.87626	4.89737	0	1.46034	0
11:23707523|23725574	2.73513	6.32837	0	0	2.31921	3.27214	0	2.15724	3.19006	4.22224	0	3.68576
11:23753217|23761155	0	0	0	0	0	0	0.629139	0	0	0	0	0
11:23756899|23761155	0	0	2.65501	0	4.62637	0	2.20725	0	1.9765	6.01819	4.67529	0
11:25986751|26081600	0	0	0	0	2.26184	0	0	0	0.940932	0	0	0
11:26397746|26407648	1.0442	3.06735	3.74846	3.19744	4.02555	4.25714	2.27067	0	6.11379	1.40821	0	1.99292
11:26397746|26434500	16.4944	17.7356	18.962	30.4529	19.0473	11.173	0	0	14.3723	14.3465	0	9.48834
11:26403322|26434500	0	1.83797	0	0	0	0.998635	0	0	0	0	0	0
11:26407548|26434500	0	1.21981	1.75593	1.31488	0	0	0	0	0	2.14372	1.90037	0
11:26534211|26550075	18.3692	13.9287	20.307	14.5719	17.0831	26.1538	11.3033	11.4109	13.4061	11.1319	15.6039	16.9281
11:26547839|26550075	0	1.95657	1.7126	0.819677	1.85032	1.36926	3.55629	0	0	0	1.62994	0
11:28867466|28868039	2.97482	0	1.9311	3.73443	1.86419	2.99814	2.5176	0	3.90738	0	4.38276	3.26587
11:29229908|29234472	0	0	0	0	0	0	0	2.31586	0	0	0	0
11:29400184|29430252	0	0	0	0	0.928244	0	0	0	0	0	1.75221	0
11:29470315|29477458	0	0	0	0	0	2.33126	0	0	0	0	0	0
11:29533226|29535266	1.36124	1.52785	0	0	0	3.49771	3.21707	3.26082	1.25458	5.65448	3.21254	0
11:29533226|29536972	0	0	0	0	0	0	2.13019	0	0	0.99606	0	0
11:29533226|29538793	0	0	0	0	0	0	0.944757	0	0	2.37632	0	0
11:29533832|29535266	0	0	0	0	0	0	0	0	0	0	1.16944	0
11:29705535|29708770	0	0	0	0	0	0	0	0	0.628333	0	0	0
11:29733633|29736498	0	0	0	0	0	0	0	0	0	0.997167	0.875618	0
11:29733633|29741050	0	0	0	0	0	0	0	0	0.628333	0	0	0
11:29784064|29785755	0	1.21981	0	0	0	0	0	0	0	0	0	0
11:29880647|29906331	0	0	0	0	0	0	1.0131	0	0	0	0	0
11:30791092|30792038	7.9615	19.5192	13.351	0	15.0866	13.9082	18.0675	0	0	22.9281	15.9478	13.6964
11:30791092|30802858	0	3.07584	0	0	2.92158	7.14423	0	0	0	7.25066	0	2.52444
11:30806255|30807825	0	0	0	0	0	0	1.30877	0	0	0	0	0
11:30819004|30835467	0	0	0	0	0	1.22252	0	0	0	0	0	0
11:30830350|30832630	0	0	0	0	0	0	0	0	0	1.67925	0	0
11:30934672|30935445	0	3.94654	3.40409	4.07129	2.17516	1.33484	4.34317	3.14462	3.50338	4.28956	3.81562	2.57887
11:30934672|30939621	3.34164	7.55613	3.66825	3.3085	7.58727	8.86269	14.1822	5.03999	5.70771	7.97327	2.81818	8.8771
11:30935368|30939621	0	0	0	0	0	0	0	0	0	0.699023	0	2.75683
11:30998313|31029066	0	0	0	0	0	0	0	0	0	0	0	2.82832
11:31055458|31061586	11.6235	19.8605	11.439	18.6076	14.4399	12.4673	28.2974	7.54091	24.0246	25.9811	20.8662	23.5808
11:3140137|3146292	1.70471	2.20074	4.59899	0	1.26506	2.34364	5.46648	1.07862	5.04908	1.00175	2.51322	0
11:3140137|3153498	1.02008	0	0	0	0	1.38233	0	0	0	1.99658	1.24155	0
11:3140137|3155496	0	0	0	0	0	1.49283	0	0	0	0	0	0
11:3142308|3146292	0	0	0	0	0	0	0.629139	0	0	0	0	0
11:3164557|3165678	2.06225	0	0	0.930991	0	0.679531	1.99545	2.88236	0	0	0	0
11:3164557|3170704	1.21026	0	0	0	0	0	1.74637	0	0	0	0	0
11:3164557|3179507	1.70013	0.665717	0	0	0	0	0.973312	0	0	0	0	0
11:3164557|3189056	0	0	0	0	0	2.33126	0	0	0	0	0	0
11:3165576|3179507	0	0	0.645886	0	0	0	1.27208	0	0	0	0	0
11:3170587|3179507	0	1.8328	0	0	0	1.33151	2.20517	0	0	0	0	0
11:3177427|3179507	0	0	0	0	0	0.861979	0	2.03366	0	0	0	0
11:3177427|3186136	0	0	0	0	0	1.33151	0	0	0	0	0	0
11:3203630|3215719	0	0	0	0	0	0	0	0	0	0.668557	0	0
11:3213260|3221294	1.02348	0	0	0	0	0	0	0	0	0	0	0
11:3220244|3221294	4.03158	0	4.92863	3.49822	0	4.56577	10.4697	6.53142	3.22029	5.88973	10.5112	2.12242
11:3221093|3221294	0.680054	0	0.73229	1.07118	0	4.62168	3.79788	0	2.85043	2.47867	0.921484	0
11:3227395|3227885	0	0	0	0	0	0	0	0	0	1.66121	0	0
11:32499225|32499461	0	0	0	0	0	0	0	0	0	2.67299	0	0
11:32555124|32577773	0	0	0	0	0	0	0	0	0	0	0	1.0642
11:32574499|32577773	0	0	0	0	0	0	0	0	0	1.66121	0	0
11:32596615|32600871	0	0	0	0.624883	0	0	0	0	0	0	0	0
11:32612671|32614713	0	1.52476	0	0	0	0	0	0	0	0	0	0
11:3262489|3264890	0	0	1.6098	1.86616	0	0	0	0	0	0	0	0
11:32652748|32711997	0	0	0	0	0	0	0	0	0.632601	0	0	0
11:32708188|32711997	0	0	0	0	0	0	0	0	0.940932	0	0	0
11:32711772|32722145	1.70013	0	0	0	0	0	0	0	0	0	0	0
11:34238150|34247861	0	0	0	0	0	0	0	0	2.51552	0	0	0
11:34294110|34300565	0	0	0	0	0	0	0	0	0	0	2.6288	0
11:34300487|34312557	0	0	3.06874	0	0	0	0	0	0	0	0	0
11:34310350|34312557	0	1.03587	4.00823	0	0	0	0	0	0	0	0	0
11:34464813|34503414	0	0	0	0	3.07966	0	0	0	0	0	0	0
11:34501170|34503414	2.50737	0	2.67127	0	1.67069	0	1.51749	0	0	0	0	0
11:35776086|35776438	0	0	1.04684	0	0	0	0	0	0	0	0	0
11:35809095|35809800	0	0	0	0	0	0	0	0	1.56927	0	0	0
11:35824396|35827466	0	0	0.642629	0.620661	0	0	0.630187	0	0	0	0	3.18539
11:35844155|35853477	0	0.610921	0	0	0	0	0	0	0	0	0	0
11:35852194|35853477	0	2.19955	0.963944	0.624883	0	2.33015	2.2243	2.51678	0	0	1.22248	0
11:35883248|35898695	1.76123	2.07356	0	1.57844	0	0	0	0	0	1.33145	0	0
11:35883248|35915285	1.36124	0	0	0	0	0	0	0	0	0	0	0
11:3975529|3976121	0	0	0	0	0	0	0	0	0	0	0	2.12124
11:40682464|40687795	0	0	0	0	0	0.998635	0	0	0	2.09341	0	0
11:4139935|4140400	0	0	0	0	0	0	0	0	0	0	1.73633	0
11:43422893|43425681	0	0	0	0	0.615317	0	0	0	0	0.99606	1.23016	0
11:43437345|43439317	0	0	0	4.37515	0	3.36757	2.99906	0	3.60439	0	2.2534	3.81775
11:43704534|43705477	7.56431	10.0706	8.35574	6.88964	8.17566	12.4671	7.25495	3.96812	8.74401	8.04506	5.04682	4.69081
11:43704534|43705567	0	0	0.963944	0	0	0	0	0	0	0	0	0
11:43704534|43717149	0	0	0	0	0	0	0	0	0	0	0	0.708258
11:43737867|43741821	0	0	0	0	0	0	0	0	0	0.749812	0	0
11:43739717|43745447	0	2.85542	0	0	0	0	0	0	0	0	0	0
11:43741761|43745447	0	1.52679	2.00261	0	0.926094	0	0	1.07982	0	2.68482	1.07001	0
11:43745085|43745447	0	0	0	0	0	0	0	1.4418	0	0	0	0
11:43835140|43836860	1.41138	0	2.90827	4.02068	1.54985	3.75574	3.14888	0	4.15513	0.997167	0	0
11:44524928|44542720	2.72135	0	0	0.930991	0	0	0	0	0	0	0.875618	0
11:4498888|4517907	0	2.7466	0	0	0	0	0	0	0	0	0	0
11:4504032|4507686	0	0	0	0	0	0	0	1.43936	0	0	0	0
11:4507590|4517907	0	3.05892	0	0	0	0	0	0	0	0	0	0
11:4507590|4531305	0	0	7.79976	2.18171	0	0	0	0	0	1.1708	5.93717	0
11:4507590|4546268	0	0	0	1.26333	0	0	0	0	0.941977	0	0	0
11:4517741|4531305	19.1696	16.5404	19.9009	8.99516	13.7146	21.9235	6.95208	6.1527	18.0607	8.3439	22.3386	9.69346
11:4517741|4539774	0	0	0	0	0	1.39481	0	0	0	0	0	0
11:4517741|4546268	7.34005	6.08781	6.85541	6.32879	5.5589	9.10631	8.99936	8.16126	8.361	7.83796	8.49235	4.76393
11:4520832|4531305	0	0	0	0	0	0	0	0	0	0	0	1.06062
11:4527836|4531305	5.61213	7.7514	9.90926	4.75772	4.81046	3.48901	11.563	5.44658	9.50787	9.12455	10.0592	8.63477
11:4527836|4546268	0	0	0	0.620661	0	0	0	2.7138	1.25562	5.23651	2.17507	3.12718
11:45883710|45890799	0	0	0	0	0	0	0	1.11222	0	0	0	0
11:45883710|45895129	0	0	0	0	0	1.6655	0	0	0	0	0	2.61381
11:45886431|45895129	0	0.616143	0	0	1.53829	0	0	0	0	0	0	0
11:45893871|45895129	0	0	0	0	3.6779	0	0	0	0	0	0	1.5289
11:46112757|46118491	0.687009	0	0	0	0	0	0	1.20382	0	0	0	0
11:46125008|46136461	0	0	0	0	0	0	0	0	0	0	0	0.708258
11:46221336|46224205	1.15546	1.41878	0	0	1.12425	1.33151	4.76278	0	0	3.32802	4.54428	0
11:4640383|4647233	0	0	0	0	0	0	0	0	0	0	3.55293	0
11:4640383|4649869	6.37372	5.20173	2.59974	2.56459	2.77946	2.66525	5.52385	0	2.90408	6.88858	4.57537	2.19041
11:4640383|4656336	0	1.03627	1.29276	0	2.4853	0	0	0	0	0	1.75318	0
11:4640383|4659384	0	0.609904	0	1.24236	0	0	0	0	0	0	0	0
11:4646562|4649869	3.06786	4.94072	4.50385	3.19997	1.94329	4.10742	3.74459	0	4.25011	1.69945	6.34979	3.11935
11:4646562|4656336	0	1.54136	1.28526	0	0.615317	0	0	0	0	0	0	0
11:4649740|4656336	0	3.11539	1.294	2.70956	3.41403	6.49564	4.56456	0	5.54282	0	2.10137	2.51893
11:4649740|4659384	0	2.78526	0.981461	0	0	3.20794	0	0	0	0	0	1.51804
11:4656269|4659384	2.66115	0	5.25386	0.620661	0	0	2.60323	4.02842	0.941977	0	2.60075	2.55394
11:4658215|4659384	3.74719	5.06498	2.64267	6.03104	1.58526	1.47102	4.57594	10.926	4.39102	2.7011	3.0225	7.60847
11:4679252|4680182	0	0	0	0	0	0	2.85025	0	0	0	0	0
11:4780578|4784563	0	23.791	18.0053	18.4685	17.6909	24.027	16.2737	19.9918	19.4525	10.3489	11.4185	16.4958
11:4782187|4784563	0	0	0	0	0	0	0	0	0	2.20029	0	0
11:4782187|4787549	0	0	0	0	0	1.00201	0	0	0	0	0	0
11:4794412|4799995	0	0	0	0	0	0	0	0	0	0	0	1.41652
11:4803678|4806336	0	1.3842	0	0	2.27792	1.33854	0.947902	2.57517	0	0.838435	0	0
11:4803678|4808325	2.04016	2.75384	0	2.51851	0	0	0.629139	2.35188	0	0	2.63619	0
11:4803678|4816165	3.14599	0	1.67355	0	0	1.33262	2.83324	0	0	0	0	1.06062
11:4803678|4818627	1.91138	2.74559	3.08044	4.7215	0	2.614	3.44979	0	0	0	3.58747	4.78364
11:4803678|4820493	4.57715	8.97907	12.2154	11.7238	0	4.39124	0	3.01471	0	10.6238	5.6293	0
11:4808257|4820493	2.52795	4.30345	4.93562	0.621695	3.40334	3.7756	2.20303	1.7989	2.59018	0	4.17299	4.5972
11:4816082|4820493	0	5.01592	4.26471	7.67961	7.40351	6.71842	8.12138	5.72131	3.65726	7.44152	5.97092	4.93711
11:4818505|4820493	0	0	0	1.04282	0	0	0	0	0	0	0	0
11:4902086|4905755	0	0	0.97813	0	0	0	0	0	0	0	0	0
11:49685087|49685352	4.98247	0	7.81187	6.82658	7.23024	5.00461	7.05477	0	0	0	0	10.4788
11:49685087|49702654	0.76088	0	0	0	0	0	0	0	0	0	0	0
11:49686847|49702654	0	0	0	3.47729	0	0	0	4.88346	1.25458	1.66121	1.83526	0
11:49809034|49815341	0	1.52476	0	0	0	0	0	0	0	0	0	0
11:50071171|50095980	0	0.610921	0	0.930991	0	0	0	0	0	0	0	0
11:50145027|50146361	0	0	0	0	0	0	0	0	0	0	1.46627	0
11:50161455|50163896	0	0	0	0	0	0	0.98099	0	0	0	0	0
11:50161455|50168802	0	0	0	0	0	0	0	0	0	0	0.876591	0
11:50202814|50203034	0	0	0	0	0	0	0	0	0	3.74955	0	4.70752
11:50206023|50207916	0	0	0	0	0	0	0	0	0	0.997167	0	0
11:50297058|50301054	0	1.9412	0	0	0	2.41268	0	0	0	0	0	0
11:50299129|50301054	18.5083	17.5356	20.2422	18.8889	15.403	23.6153	15.186	15.2505	23.879	18.2738	20.7111	14.9488
11:50301758|50308929	0	3.45031	9.34395	3.1498	0	2.037	3.15297	0	8.63699	0	0	2.47478
11:50301758|50310867	0	0	0.642629	0	0	0	0	0	0	0	0	0
11:50304326|50308929	8.8813	6.2213	4.04314	6.15085	4.61488	8.83876	7.51533	7.94793	10.6826	11.053	2.59413	4.82265
11:50307470|50308929	24.2284	30.1211	29.0605	27.2186	21.3295	19.647	12.7521	23.41	31.4322	22.8421	22.8978	18.543
11:50307470|50310867	0	1.34864	4.72451	5.91427	1.91192	0	5.11513	2.87752	5.14825	11.9166	5.70881	0
11:50307470|50311784	0	0	2.2492	0	0	0	0	0	0	0	0	0
11:5030962|5033842	0	0	0	0	1.58044	0	0	0	0	0	0	0
11:50394921|50398490	0	0	0	0	0	0	1.08642	0	0	0	0	0
11:50394921|50404621	0	0	0	0	0	0	0	0	0	0	2.05887	0
11:50394921|50406483	0	0	0	0	2.1578	0	0	0	0	0	0	0
11:50404454|50407924	0	2.74763	0.987023	0.986754	0	0.999744	2.26124	0	1.31981	0	3.40044	1.41416
11:50406367|50414582	1.44184	0	0	0	0	0	2.5283	0	0	2.07555	0	0
11:50414517|50417307	0	0	0	0	0	0	0	0	2.20391	0	0	0
11:5078473|5088146	0	0	0.675464	0	0	0	0	0	1.57031	0	0	0
11:51271800|51273626	6.66611	13.7027	8.66493	10.2542	6.61813	9.94456	6.75706	5.48493	10.8182	13.6623	4.36143	9.6201
11:51275770|51281199	0	0	0	0	0	0	0	0	0	0	0	0.70708
11:51591399|51594141	0	0	0	0	0	0	1.0217	0	0	0	0	0
11:51598276|51599596	0	0	0	0.935213	0	1.33151	0	0	0	0	0	0
11:51602593|51605629	0	0	0	0.953	0	0	0	0	0	0	0	0
11:51696649|51701262	0	0	0	0	0	2.12134	0	0	0	0	0	0
11:51696649|51704413	0	0	0	0	0	1.33151	0	0	0	0	0	0
11:51708935|51712362	0	0	0	0	1.23063	0	0	0	0	0	0	0
11:51712189|51717779	0	0.612995	0	0	0	0	1.89698	0	0	0	0	0
11:51716439|51729575	0	0	0	0	1.23063	0	0	0	0	0	0	0
11:51716439|51729578	0	0	0	4.0867	0	0	0	0	0	0	0	0
11:51721815|51729575	0	7.06061	2.40616	0	0	3.71004	0	0	1.88712	0	1.46625	4.1779
11:51721815|51729578	5.80115	2.56648	4.75188	4.79426	4.00736	2.85502	4.35485	2.95461	5.31277	1.37808	3.935	4.24366
11:51721815|51731905	0	0	0	2.42046	1.36038	2.23247	0	0	0	0	0	0
11:51723584|51729578	0	0	0	0	0	0	0.642155	0	0	0	0	0
11:51723584|51731905	0	0	0	0	0	0	0	0	0.940932	1.32808	0	0
11:51726485|51729575	0	0	0	0	0	0	0	0	0.760439	0	1.76598	0
11:51726485|51729578	2.81941	3.40411	1.37868	0	3.42016	2.12636	0	1.32057	0	6.20145	2.62685	3.60939
11:51726485|51731905	3.21983	4.69461	5.2025	5.42489	0	4.39888	0	0	5.01323	6.49131	1.43947	0.708258
11:51726485|51734661	0	0	0	0	0	1.6655	0	0	0	0	1.16846	0
11:51729452|51731905	3.86487	2.78846	5.48231	4.14874	5.40509	3.03508	4.8191	0	1.44476	0.66404	1.79677	2.41145
11:51729452|51734661	3.40027	0	4.55641	2.7972	0	2.33237	0	0	4.43723	2.42688	1.66129	2.57125
11:51733392|51733927	0	0	0	0	0	0	0	0	0	0	0	1.06062
11:51733392|51736521	0	0.915873	0	0	0	0	0	0	0	0	0	0
11:51743536|51744000	0	2.14186	0	0	4.66058	2.3436	0	0	0	2.24073	0	0
11:52029842|52032524	0	0	0	0	1.24311	0	0	0	0	0	0	0
11:5209939|5215531	0	0	0	0	0	3.38117	0	0	0	0	0	0
11:52113120|52119304	0	0	0	0	0	1.11998	0	0	0.627288	0	0	0
11:52117987|52119304	2.20165	2.25117	5.31711	3.96211	0.623704	2.85622	11.6129	6.4783	9.79832	7.55877	7.13469	1.7677
11:52236837|52242660	3.72539	6.94509	6.11744	5.01611	0	0	4.36445	8.11123	0.994422	4.28254	3.39273	2.81278
11:52236837|52243758	0	0	1.08371	0	0	0	0	0.758735	2.19655	0	0.588649	0
11:52236837|52245121	3.56973	8.5609	6.58926	4.86828	5.36715	0	6.63085	6.65673	7.7779	0	13.362	9.82485
11:52403046|52403557	0	0	0	1.87034	0.618435	0	4.44889	0.71908	0	0	2.15779	3.50736
11:53265034|53267118	0	1.22083	0	0	0	0	0	0	0	0	0	0
11:53265924|53267118	0	10.9291	10.167	13.7648	17.9505	20.1685	22.8289	15.2254	14.1366	24.8268	22.5488	16.4745
11:53280468|53284199	0	0	0	0	0	0	0	0	0	1.36147	0	0
11:53280468|53292314	0	0	0	0	0	0	0	1.08226	0	0	2.73962	0
11:53283529|53292314	0	0	0	0	0	2.00739	0	1.08346	0	0	1.45936	0
11:53284100|53289164	0	0	0	0	1.23166	0.672504	0	0.722724	0	0	0	0
11:53284100|53292314	0	0	0	0	0	1.84453	0	0	0	0	1.30038	0
11:53286822|53292314	0	0	0	0	0	0	0	1.94037	0	0	0	0
11:53286853|53292314	0	1.52476	0	0	0	0	0	0	0	0	0	0
11:53289024|53292314	0	1.22083	0	0	0	0	0	0	1.64911	0	0	0
11:53368660|53375633	5.10956	0	2.48771	3.45719	4.9656	4.74629	1.35146	1.18646	2.52635	1.85126	0	0
11:53368660|53380672	0	0	3.74927	4.66017	0	3.7898	2.52242	1.90618	0	3.99531	0	0
11:53399589|53402566	5.24335	3.77175	7.891	5.17851	5.65206	8.12949	4.31564	4.64275	5.4104	2.37742	5.87451	5.37644
11:53399589|53404602	2.8535	0	0	2.79297	0	7.16615	0	0	0	0	1.85232	1.8934
11:53399589|53406675	0	0	0	1.02463	0	0	0	0	0	0	0	0
11:53407880|53408193	0	5.0526	5.34409	6.04593	0	3.32878	0	4.52142	5.36409	0	0	0
11:53537154|53537915	0	4.2858	5.42602	0.930991	0	0	2.20199	0	1.25458	0	0.584718	0
11:53537487|53537915	0	0	0	0	0	0	0	0	0	0	2.04311	0
11:53583227|53586930	0	0	0	0	0	0	0	0	1.25458	0	0	0
11:53683202|53684301	2.44287	2.4372	1.60657	2.80238	0	2.79779	0	0	1.33665	0	2.56086	0
11:54124657|54129562	0	0	0.6437	0	0	0	0	0	0	0	0	0
11:54490803|54496687	1.36011	0	0	0	2.22989	0	3.59983	4.80687	4.54842	0	0	0
11:54543579|54546429	0	0	0	0	0	0	0	0	0	1.5177	0	0
11:54543579|54552873	0	0	0	0	0	2.11785	0	5.39914	0	1.07838	2.90632	0
11:54543579|54568496	6.61784	0	8.73188	7.31372	5.9119	9.06162	9.27344	10.6325	10.7503	13.1578	8.86027	0
11:54552790|54568496	0	0	0	0	0.929341	0	0	0	1.26729	0	0	0
11:54561325|54568496	0	0	0	0	0	0	1.30881	0	1.38102	1.19288	2.42555	0
11:54610788|54626019	0	0	0	0	0	0	1.57494	0	0	0	0	0
11:54668614|54676415	0	0	0	0	0	0	0	0	0	1.33029	0	1.41416
11:54740238|54740550	0	0	1.28742	0	0	0	0	0	0	0	0	0
11:54840930|54853299	0	0	0	0	0	0	0	0	0.633646	0	0	0
11:54848579|54853299	0	0	0	0	0	1.99727	0	0	0.988817	1.32808	0	0
11:54981616|54986215	0	0	0	0.934108	0	0	0	0	0	0	0	0
11:5722802|5726857	0	0	0	0	0	0	0	0	0	0	0	2.39108
11:57487567|57505357	0	0	0	0	0	0	0.943708	0	0	0	0	0
11:57490110|57499805	0	0	0	0	0	0	0	0.82476	0	0	0	0
11:57491920|57499805	0	1.21981	0	0	0	0	0	0	0	0	0	0
11:57493004|57505357	0	0	0	0	1.84698	0	0	0	0	0	0	0
11:57721295|57725661	0	3.86477	0	0	0	5.12423	2.20517	0	2.84004	3.97492	3.21157	4.2532
11:57721295|57737144	0	0	0	0	0	0	0	0	0	0	0	1.07553
11:5791792|5794311	0	0	0	0	1.73709	0	0	0.71908	0	0	0	0
11:5798016|5798325	0	0	0	0	0	0	0	0	1.57458	0	0	0
11:58040391|58041652	0	0	0.965015	0	0	0	0	0	0	0	0	0
11:58040391|58044050	0	0	2.59933	0	3.93838	0	0	0.720278	1.25458	0	1.79074	0
11:58042436|58042642	0	0	1.28526	0	0	0	0	0	0	0	0	0
11:58109556|58115375	0	0	0	2.59603	0	1.6655	0	0	0	0	0	0
11:58111260|58113213	0	0.609904	1.92789	0	0	0.998635	0	0	0	0	0	0
11:58111260|58115375	0	0	0	0.62273	0	0.665756	0	0	0	0	0	0
11:58113052|58115375	2.26714	0	0	0	0	0	0	0	1.88186	0	0	0
11:58147827|58148488	0	0	0	0	0	0	2.07528	0	0	0	0	2.32382
11:5906477|5906778	5.17731	5.94208	0	0	6.03121	0	0	0	8.2877	8.02449	0	2.12124
11:5906683|5910432	0	0.614012	0	0	0	0	0	0	0	0	0	0
11:5910278|5911024	0	4.33894	7.49932	1.55269	0	0	6.05201	0	6.67682	0	0	2.84551
11:59428341|59428813	0	0	0	0.930991	0	0	0	0	1.29538	0	0	0
11:59428341|59438513	0	0	0	2.47448	0	0	0	0	0	0	0	0
11:59437978|59438513	0	0	0	0	0	1.336	0	0	0	0	0	0
11:59824275|59833144	0	0	0	0.936163	0	0	0	0	0	0	0	0
11:59832884|59833144	1.92683	0	0	0	0	0.741149	0	0	0	3.45691	0	0
11:60258856|60275002	1.03774	0	1.28526	1.40596	0	0	0	0	1.25775	0	1.35059	0
11:60258856|60280283	0.681187	0	0	1.87034	0	4.6603	0	0	0	0	0.587676	0
11:60270318|60275002	2.44414	2.57451	5.76626	7.33746	1.85602	2.69202	4.16355	0	6.41747	9.98482	5.59076	0
11:60270318|60280283	0	0	0	2.7632	0	2.90479	0.671712	0	0	0	0	0
11:60274924|60280283	2.66768	0	0	0	0	0	0	0	0	0	0	0
11:60403837|60407391	0	0	0	0	0	0	0	0	0	0	0	0.708258
11:60405776|60409405	0	0	2.30602	0	0	0	0	0	0	0	0	0
11:60460787|60462634	5.81515	5.99493	0	1.55165	3.9213	2.93142	8.52963	6.87635	5.58934	1.66794	1.17142	2.26153
11:60706193|60706355	0	0	0	0	0	0	0	0	0	0	0	2.91764
11:60706193|60707113	0	0	0	0	0	0	0	0	0	0	0	4.05664
11:60745817|60749589	0	0	0	0	0	0	0	0	0.9506	0	0	0
11:60747866|60749589	4.69835	2.44889	1.92896	0	3.07659	3.1057	3.53292	3.70026	4.08051	1.99212	0	0
11:60789596|60790262	2.96575	0	12.7542	0	4.36082	6.32469	6.88356	0	0	0	0	0
11:6113243|6125561	0	9.08855	5.50572	4.73629	1.6689	3.38701	4.17996	0	0	5.98982	0	0
11:6119334|6125561	0	0	0	0	0.924001	0	1.09326	0	0	0	0	0
11:61352662|61363491	0	0	0	0	0	0	0.629139	0	0	0	0	0
11:6150495|6193476	0	0	0	0	0	0	0	0	0	0	0	1.73371
11:61522406|61523193	0	0	0	0	0.715171	0	0	1.08223	0	0	0	0
11:61532518|61535383	2.72135	5.45601	0	2.0565	0	6.7281	0.946896	0	0	0	5.11477	2.89497
11:61532518|61544328	1.36011	0	0	0	0	0	0	0	0	0	0	0
11:61736916|61745060	0	0	2.45778	0	0.667786	1.70659	0.629139	0	0	0	0	0
11:61781592|61787637	0	0	0	0	0	0	0.95537	0	0	0	0	0
11:61787429|61791583	0.680054	4.6975	6.11834	7.062	2.90005	3.41131	3.54527	3.39708	0	0	0	0
11:61799902|61801563	0	0	0	0	0	0	0	0	0	0	0	0.713134
11:61824639|61829450	0	0	0	0	0	1.03809	0	0	0	0	0	0
11:61886700|61900446	0	0	0.963944	0	0	0	1.88742	0	0	0	0	0
11:61886700|61909946	0	0	0	0	0	1.67345	0	0	2.57118	0	0	0
11:61900310|61904859	0	0	0	0	0	0	0.631236	0	0	0	0	0
11:61903907|61909946	0	0	0	0	0	0.665756	0	0	0	0	0	0
11:61909848|61916266	2.13474	0	0	0.649895	3.05067	2.00175	4.10232	0	0	0	0	0
11:61909848|61922829	5.02522	2.43291	0	2.72974	5.89212	0	0	0	0	3.21322	0	0
11:61915024|61922829	5.20032	4.02194	0	0.999598	6.11565	0	5.01797	1.43816	0	5.07913	0	0
11:6193154|6193476	36.3757	44.7261	47.8789	39.6974	37.6679	38.2626	32.9742	48.6565	33.6824	43.1102	35.0917	32.8024
11:62029253|62043075	0	0	0	0	3.54239	0	0	0	0	0	0	0
11:62128200|62132454	0	0	0	0	0	0	0	1.43816	0	0	0	0
11:62146306|62147668	0	0	0	0	0	0	0	0	0.94729	0	0	0
11:62146306|62161910	0	0	0	5.38101	2.1716	2.39671	0	2.51798	4.72663	2.08498	2.6288	2.1236
11:62146306|62211703	0	0	0	0.819677	0	0	0	0	0	0	0	0
11:62283597|62292218	0	4.36337	4.1803	3.79119	3.38839	3.93276	6.94579	1.67997	5.28396	4.14473	5.58171	4.61644
11:62338859|62345318	0	0	1.3733	0	0	0	0	0	0	0	0	0
11:62340408|62340629	0	0.992232	0	0	0	0	0	0	0	0	0	0
11:62340408|62345318	0	1.22184	0	0	0	0	2.51655	0	0	0	0	0
11:62342997|62345318	0	0	1.28847	0	0	1.66439	1.68725	0	0	0	0	0
11:62349353|62354688	0	0	0	0	0	0	0	0	0	2.65616	0	0
11:62349353|62359015	0	0	0	0	0	0.665756	0	0	0	0	0	0
11:62351378|62354688	0	0	3.07859	0	0	1.6655	0	0.726368	0	0	2.04311	0
11:62366964|62369423	0	0	0	0	0.616343	0	0	0	0	0	0	0
11:62376635|62378654	3.36507	2.81189	0.979563	0	0	3.76964	0	0	0	0	2.6615	0
11:62376635|62381470	0	0	0	0	0	0	0	0	0	0	1.4623	0
11:62376635|62383375	0	0	5.27969	0	0	0	0	0	0	0	0	3.30193
11:62383161|62391033	0	0	0.71585	0	0	0	0	1.08221	0	0	0	0
11:62384718|62389792	0	0	0	0	0	0	0	0	0.941977	0	0	0
11:62384718|62391033	0	1.3133	3.37946	1.24132	0	0	0	0	0	1.33145	0	0
11:62384718|62395228	0	0	0	0	0	0	0	0	0	2.98929	0	0
11:62389691|62395228	0	0	0	0	1.84598	0	0	0	0	0	0	0
11:62392505|62395228	0	0	0	0	0	1.34163	0	0	0	0	0	0
11:62395138|62398437	1.82217	0	1.92789	0	0	0	1.57494	2.15844	0	0	0	2.83431
11:62398265|62401267	0	4.63309	6.67725	1.28069	0	4.05317	0	0	7.13261	5.71787	0	2.6298
11:62403799|62423067	0	0	0	0	0	1.00201	0	0	0	0	0	0
11:62410820|62433699	0	0	1.93004	0	0	0	0	0	2.48822	0	0	0
11:62410820|62438515	2.57061	0	2.8929	0	0	0	0	1.43816	1.56822	0	0	0
11:62419598|62423067	0	3.42275	2.30213	0	0.924001	1.06154	0	1.26747	3.20965	0	0	0
11:62419598|62433699	0	0	0	0	0.616343	0	0	0	0	0	0	0
11:62419598|62438515	2.74949	0	0.652812	0	0	1.33151	0	1.43816	0	0	0	0
11:62422875|62438515	0	0	1.20742	0	0	0	0	0	0	0	0	0
11:62433563|62438515	3.74029	6.44757	4.08229	6.673	4.52119	7.67119	6.83858	8.9582	9.14993	4.3207	5.88134	3.07734
11:62438338|62438515	0	0	0	3.69478	1.89591	0	0	2.98706	0	0	1.27774	0
11:62533885|62536380	0	0	0	0	1.25651	0	0	0	0	0	0	0
11:6313788|6316855	2.04016	1.54769	0.715774	0	0	1.82741	1.98628	0	0.627288	2.81365	1.77587	0
11:6313788|6317080	101.401	70.8555	78.5343	102.615	78.7635	99.2986	82.9921	95.4709	104.078	70.6568	104.997	67.7285
11:6338558|6339928	0	0	0	0	1.53932	0	0	0	0	0	0	0
11:6338558|6340622	0	0	0	0	1.63769	0	0	0	0	0	0	0
11:64071518|64073670	0	0	0	1.03171	0	0	0	0	0	0	0	0
11:64982756|64983725	0	0	0	0	1.3098	0	3.52402	0	0	0	0	2.12242
11:6514467|6515208	0	0.615126	0	0	0	0	0	0	0	0	0	0
11:65218529|65233184	0	0	0	0	0	0	0	1.70559	0	0	0	0
11:65706984|65712297	1.70242	0	0	0	0	0	0	0	0	0	0	0
11:65706984|65719603	0	0.931452	0	0	0	0	1.25933	0	1.88291	2.34769	0	0
11:65706984|65735366	0	0	0	0	0	0	1.25933	0	0	0	2.20165	0
11:65706984|65756371	1.7024	0	0	0	0	0	0	0	0	0	1.2365	0
11:65719484|65756371	3.05069	2.76451	2.47982	1.28018	4.4235	7.61055	1.57494	0	0	3.67966	3.32448	0
11:65735192|65756371	1.03387	4.36558	4.75692	1.88529	0.927162	2.81457	4.54229	0	0	0.665147	0	0
11:65756269|65775765	0	0	0.644771	0	0	0	0	0	0	0	0	0
11:65814365|65814851	0	0	0	0	0	0	0	0	0	1.32808	0	0
11:6584520|6585217	0	0	0	0	0	0	1.52959	0	5.39083	0	0	0
11:68011315|68020998	2.86683	0	0	0	0	0	0	0	0	0	0	2.48201
11:68829915|68840007	0	0	0	0	0	0	0	0	0	0.665147	0.879589	0
11:68829915|68845424	3.52237	0	0	0.620661	1.23063	3.34903	1.26039	0	1.3166	1.6601	0	0
11:68833354|68836323	0	0	0	0	0	2.00171	0	0	0	0	0	0
11:68833354|68840007	0	0	1.28526	0	0	0	0	0	0	0	0	0
11:68833354|68845424	0	0	0	0	0.615317	0	0	0	0	0	0	0
11:68836150|68843974	0	0	0	0.621695	0	0	0	0	0	0	0	0
11:68836150|68845424	0	0	0	0	0	0	0.943708	0	0	0	0	0
11:68839871|68842168	0	0	0	0	0	0	0	0	0	0	1.45936	0
11:68839871|68845424	0	0	0	0	0	1.75847	0	0	0	0	0	0
11:69047785|69048879	0	0	0	0	0	0	0	0	0	0.99606	0	0
11:69314711|69315426	0	0	0	0	1.53829	0	0	0	0	0	0	0
11:69363620|69364804	0	0.914856	0	0	0	0	0.642545	0	0	0	0	0
11:69622860|69623152	0	0	0	0	0	0	0	0	1.46704	0	0	0
11:69639390|69643954	0	0	0	0	0	0	0.629139	0	0	0	0	0
11:69641282|69641589	0	0	0	0	0	0	3.22656	0	0	0	0	0
11:69642047|69643954	0	1.82971	0	0	0	0	0	0	0	0	0	0
11:69649728|69651723	38.0253	32.9314	36.8878	26.5026	38.8644	34.1402	27.6772	23.3535	27.5814	35.4596	28.8442	27.0039
11:69650463|69651723	1.25054	1.83278	0	1.6162	0	0.998635	0	1.07862	0	0	0	0
11:69743803|69744260	0	0	1.61086	0	0	0	0	0	0	0	0	0
11:69914273|69914861	0	0	0	0	0	0	0	0	0	0	0.585691	0
11:70010849|70011265	1.02121	0	0	0	0	0	0	0	0	0	0	0
11:70597168|70599105	0	0	0	0	0	0.998635	0	0	0	0	0.877577	0
11:70874746|70884968	180.417	193.814	254.68	218.891	204.495	288.236	222.801	187.171	246.587	276.697	235.288	201.309
11:70874746|70887171	77.1062	75.4574	72.2078	78.6444	70.0953	86.181	59.823	60.9258	87.061	64.5762	65.3947	55.5589
11:70874746|70893688	13.8706	18.0789	18.4321	21.1493	10.066	23.4111	13.6273	16.3871	12.7334	13.011	15.9184	10.6714
11:70874746|70900607	4.13739	0	7.27631	8.84505	2.16087	4.15267	1.61013	4.34577	0	2.74049	3.2106	0
11:70874746|70904783	0	0	0	0	0	0	0.945805	0	0	0	0	0
11:70874746|70908517	0	0	0	0	1.57325	0	0	0	0	0	0	0
11:70874757|70893688	0	0	2.14536	0	0	0	0	0	0	0	0	0
11:70884765|70884968	0	0	0	0	0	1.0076	0	0	0	0	0	0
11:70884765|70887171	4.925	5.60193	2.62832	1.24761	0	3.95493	8.25933	5.27895	5.56961	2.08646	1.74932	3.00609
11:70884765|70893688	3.79032	3.80074	5.97834	2.19549	3.57963	9.2815	2.7547	1.52001	4.39206	4.07024	3.80078	0.838854
11:70887011|70893688	0	0	0	0	0	0.840602	0	0	0	0	0.583745	0
11:70887011|70900607	0	0	2.25243	0	2.32569	1.47274	2.01977	1.47437	3.61767	1.12781	1.46034	3.58426
11:70893569|70900607	1.02121	1.08542	1.10083	1.55269	0.676836	1.36926	1.90501	0	1.25458	1.33481	2.04507	0.714246
11:70893569|70908517	0	0	0	1.50168	0	0	0	0	0	0	0	0
11:70893569|70908556	0	0	0	0	0.616343	0	0	0	0	0	0	0
11:70900472|70904783	3.2082	2.83912	2.67543	8.37588	1.58799	3.71179	4.74009	5.86794	2.82817	2.65616	2.1468	1.79043
11:70900472|70908517	5.46966	6.5074	6.11263	6.52082	9.48728	5.73679	7.22226	6.29531	9.62098	11.1848	4.78006	10.1281
11:70900472|70908556	0	0	0	0	0	0	0	0	0	0	1.46131	0
11:70900472|70917782	0	1.83175	0	0	0	0	0	0	0	0	0	0
11:70900472|70920968	0	0	0	0	2.15464	0	0	0	0	0	0	0
11:70900472|70923241	0	0	0	0.946077	0	0	2.43178	0	0	0	0	0.70708
11:70900472|70925912	2.72021	0	1.28526	0	0.616343	0	0	2.51919	0.627288	5.67022	3.21157	0
11:70917315|70917782	0	5.28624	3.45469	1.15932	0	0	3.16146	5.89087	2.19864	2.00558	4.50567	1.7677
11:70917315|70920968	1.03286	0	1.92789	0	0	0	0	0	0	0	0	0
11:70917315|70923241	0	0	1.28633	0	1.90445	0	0	0	1.25562	0	0	0
11:70917315|70925912	4.19644	2.75287	1.60657	5.25851	2.92059	4.66141	0	3.64903	2.54374	5.49557	0	0
11:70919177|70920968	0	1.52679	1.75286	2.51281	0.922976	3.90123	1.86725	2.79616	1.25458	0.99606	2.80085	2.04492
11:70919177|70923241	0	2.47281	0	0	0	0	0	0	0	0	0	0
11:70919177|70925912	0	0	0	0	0	1.00427	0	0	0	0	0	0
11:72399874|72404004	0	0	0.963944	0	1.54137	0	0	0	0	0	0	0
11:72645537|72663173	3.0447	6.32259	3.22185	0	0	7.70195	0	11.2615	5.18503	4.75191	4.78625	0
11:72645537|72673057	2.38245	0	1.60657	0	0	0	0	0	0	0	3.5841	0
11:72663071|72673057	2.88413	0	2.23838	2.4358	0	1.69138	0	0	2.42172	5.80285	0.875618	0
11:72663071|72677883	0	0	2.57159	0	0	0	0	0	0	0	0	0
11:72663071|72679492	0	0	1.36164	0	0	0.998635	0	0	0	0	2.04311	0
11:72712157|72714483	9.72716	5.69204	1.65006	5.47068	5.44044	0	7.65992	3.29245	3.86506	5.97233	0	3.24937
11:72712157|72722763	0	0	0	0	0	0	0	0.720278	0	0	0	0
11:72712157|72730621	0	0	0	0	0	0	0	0	0	2.99039	0	0
11:72722628|72732413	0	0	0	0	0	0	0	0	0	0	0.879589	0
11:72728761|72732413	0	0	0	0	0	0	0	0	0	0	1.39991	0
11:72759916|72761509	0.68232	0	0	0	0	0	0	0	0	0	0	1.06417
11:72817931|72826262	0.680054	0	0	0	0	0	0	0	0	0	0	0
11:72866072|72866805	0	0	0.644786	0	0	0	0	0	0	0	0	0
11:72893262|72895285	0	0	0	0	0	0	0	0	0	0	0	1.07039
11:72893262|72901459	0	0	0	0	0	0	0	0	0	0.674181	0	0
11:72906832|72910321	0	0	0	2.79928	1.26985	0	0	0	0	0	0	0
11:72910130|72911262	0	0	0	0	0.926094	0	0	0	0	0	0	0
11:73191678|73196717	0.6835	0	0	0	0	0	0	0	0	0	0	0
11:74435701|74441785	0	0	0	0	0	0	0	2.88361	0	0	0	0
11:74656423|74657339	19.338	18.2998	26.5729	19.839	13.702	25.6483	35.0913	19.9873	20.8602	27.4906	22.8275	28.7743
11:74688977|74699520	1.02121	0	0	0	0	0	0	0	0	0	0	0
11:74690210|74699520	0	0	0	0	0	0	0	0	0	0	0	1.41534
11:74784058|74787695	0	2.5184	0	2.48368	0	0	0	0	3.1954	0	2.94953	0
11:74836363|74837723	0	0	0	0	0	0	0	0	0	0.690127	0	0
11:74908996|74913133	0	0	0	0	0	0	0	0	0.940932	0	0	0
11:74909694|74913133	0	0	0	1.86717	0	0	0	0	0	0	0	0
11:74911043|74913133	0	0	3.26612	0	3.08274	0	0	0	0.949526	0	1.20748	3.19514
11:74945522|74946219	0	0	0.642629	0	0	1.01108	0	0	0	0	0	1.41653
11:74945522|74990215	0	0	0	0	0	0	0.629139	0	0	0	0	0
11:74981852|74990215	0	2.26606	2.69433	0	1.90973	0	0.943708	0.720278	0	1.04151	1.58719	1.41534
11:74987736|74990215	0	0	0	0	0	0	0	0	0	2.40646	0	0
11:75038613|75042036	0	0	2.37301	0	0	0	2.20619	0	1.58001	0	0	0
11:75038613|75053963	0	0	0	0	0	1.99949	0	0	0	0	0	0
11:75328673|75342194	0	2.60081	0	0	0	0	1.25828	1.43816	0	0	2.33989	0
11:75390072|75391227	6.58597	5.53481	4.84791	5.0558	7.11329	7.21451	0	0	0	1.7388	3.10562	1.06062
11:75413907|75416428	1.02008	0	0	0	0	0	0	0	0	0	0	0
11:75504478|75505288	1.71666	0	0	0	0	0	0	2.15844	0	0	0	0
11:75515166|75515688	0	0	0	1.24339	0	0	0	0	0	0	0	0
11:75543158|75545830	0	0	7.28416	2.17542	0	1.66777	2.30168	0	3.63237	0	2.14926	2.17826
11:75665518|75665917	0	0	0	0	0	0	0	0	1.23326	0	0	0
11:75692197|75692562	0	0	2.40282	0.984573	0	0	0	0	2.5102	0	0	1.41416
11:75692197|75692732	0	5.8383	6.29746	1.03535	1.25273	3.04148	4.62066	3.74283	2.01845	0	0	4.94715
11:75751881|75757023	0	0	0	0	0	0	0	0	1.00002	0	0	0
11:75751881|75759428	6.04312	5.52485	4.0234	6.49596	3.08903	3.00039	10.0799	4.72075	2.93254	7.02178	4.09108	1.89199
11:76076435|76082684	0	0	0	0	0	1.99727	0	0	3.14175	0	0	1.06779
11:76081147|76082684	0	0	2.25242	0	0	0	0	0	0	0	0	0
11:76101987|76117805	0	0	0	0	0	0	0	0	0	0	0.891491	0
11:76113941|76117805	0	0	0	0	0	0	0	0	0	0	1.55073	0
11:76117059|76121596	0	0	0	0	0.616343	0	0	0	0	0	0	0
11:76121518|76138394	0	0.914856	0	0	0	0	0	0	0	0	0	0
11:76134409|76138394	1.72685	1.5584	4.58854	5.21415	0	3.19096	0	4.53799	0	0	0	5.68457
11:76233022|76234525	0	0	0	0	0	0	0	0	0	1.83984	0	0
11:76478995|76486536	0	0	0	0	0	0	0	0	0	0	0	1.7677
11:76748508|76750902	1.76868	3.41794	0	0	3.12504	2.82844	3.00171	6.34036	2.60454	0	0	2.58589
11:76748508|76754800	5.63865	7.32907	6.11874	5.83842	5.96313	7.68394	6.48768	3.29195	3.49514	0	0	7.52429
11:76811695|76813652	0	0	0	0	0	0	0	0	0.947348	0	0	0
11:76840388|76840635	0	0	0	0	2.17873	0	0	0	0	0	0	0
11:77393050|77398269	8.87157	0	0	14.1669	9.61274	7.42142	11.2115	13.8387	20.3525	17.0452	12.1375	5.81393
11:77393050|77408247	0.681187	0	0	0	0	0	0	0	0	0	0	0
11:77421216|77425651	0	0	1.60657	0	0	0	0	0	0	0	0	0
11:77425301|77425651	0	3.71092	2.03217	0	2.15361	2.08326	0	0	0	0.746359	5.48811	3.57323
11:77425301|77442058	0	0	1.29177	0	0	1.35741	0	0	0	0.704447	0	0
11:77449388|77450222	0	0	0	0	0	0	0	0	0.944068	0	0	0
11:77541625|77553909	0	0	0	0	0	0.666866	0	0	0	0	0	0
11:77549272|77553909	0	2.74865	0	0	0	0.66913	0	0	0	0	0	0
11:77553673|77555698	0	0	0	0	0	0	0	0	0	0	0.954621	0
11:77555564|77560421	0	0	0	0.930991	0	0	0	0	0	0	0	0
11:77559742|77560421	0	0	5.13193	0	0	0	0.956461	0	0	0	1.16944	1.7677
11:77563664|77571698	0	0	1.28526	0	0	0	0.950084	0	0	0	1.24538	0
11:77563664|77575669	0	1.22083	0	0	0.684372	0	0	0	0	0	0	0
11:77563664|77578827	0	0	0	0	3.26269	0	0	0	0	0	0	0
11:77563664|77579845	0	0.914856	0	0	0	0	0	0	0	0	0	0
11:77563664|77585494	0	1.52679	0	0	0	0	0	0	0	0	0	0
11:77565746|77579845	0	0	0	0	0	0	0	0	1.25458	0	0	0
11:77571607|77578827	0	0.88364	0	1.14688	0	0	0	0	0	0.838921	0.880616	2.64954
11:77571607|77579845	1.08547	0	4.05289	2.22013	2.78491	3.15472	0	4.05828	5.10204	0.997167	4.69931	2.01502
11:77571607|77585494	4.83081	9.99924	11.1638	8.92653	4.65736	13.2992	12.5373	6.58548	7.40638	6.74111	4.40095	8.89531
11:77573696|77577368	0	1.83278	0	0	0	1.01819	0	0	0	0	0	0
11:77573696|77585494	0	0	0	1.06323	0	2.04232	1.58132	0	0.627288	0	0	0
11:77575573|77578827	0	3.17762	0	1.0752	0	0.77717	0	3.52716	0.968009	3.51094	0.583745	1.06062
11:77575573|77579845	0	1.83175	3.36176	0	3.00211	0.665756	2.8451	0	0.627288	0	3.06953	3.92046
11:77577323|77578827	0	0	0	0	0	0	0	2.12594	0	0	1.00211	0
11:77577323|77585494	0	0	0	0.66266	2.48638	2.10942	0	0	1.01442	1.00175	0	1.41416
11:77578726|77585494	2.10422	1.52476	0	0.930991	1.66412	3.99748	0	1.43816	0	2.65616	1.75124	0
11:77691542|77693254	0	0	0	0	0	0	1.25933	0	0	0	1.55073	0
11:77777235|77778314	0.680054	0	0	0.707448	3.39259	0	2.60572	1.43936	4.43937	0	2.33498	3.18304
11:77853217|77853891	0	0	0	0	0	1.66439	0	0	0	0	0	0
11:78006727|78009794	0	3.33017	1.42626	0	1.29463	0	1.88953	0	0	3.32573	2.76145	0
11:78009401|78009794	0	0	0	0	0	2.66637	0	3.39448	0	0	2.04311	0
11:78013171|78015630	0	0	0	0	0	2.43026	0	0	0	1.42175	2.12713	0
11:78013171|78018229	5.18794	0	0	4.55757	0	0	8.53779	6.91879	6.38753	0	11.3306	5.9705
11:78211797|78213462	0	0	0	0	0	0	0	0	0	0	0	1.78818
11:78228629|78229513	0	0	0	0	0	2.9959	0.76695	0	0	0	0	0
11:78279047|78279915	0	0	3.76359	0.937282	0	2.33015	0	0	0	0	1.16846	0
11:78284100|78284860	1.02008	0	0	0	0	0	0	0	0	0	0	2.47186
11:78319986|78321766	13.8538	4.93771	12.1324	15.3814	12.0671	10.4147	0	9.83082	6.59725	0	0	4.55589
11:78335427|78336830	0	0	1.44433	0	0	0	0	0	0	0	0	2.12361
11:79384175|79390399	0.726072	1.50192	2.01156	1.2781	1.24311	4.75107	5.47266	0	0.638029	0	0.703768	0
11:79384175|79395961	0.680054	0	2.33059	0	2.77057	1.00316	0	0	0.628333	0	0	0
11:79408414|79409551	0	0	0.642629	0	0	0	0	1.43936	0	0	0	0
11:79425513|79428691	0	0	1.60872	0	0	0	2.20627	3.5786	0	0	0	0
11:79425513|79438848	0	0	0	0	0	0	0	0	1.56822	3.36358	0	0
11:79446806|79448336	0	0	0	0	0.619503	0.999744	1.57285	1.7989	2.66209	3.10037	0	0
11:79463233|79475883	1.78797	0	1.60979	0	0	0	0	0	1.77817	0	2.42321	2.82832
11:79468717|79475883	0	0	1.95516	0	0	0	0	0	0	0	0	0
11:79536793|79546412	0	0	0	0	0.925027	0	0	0	0	0	0	0
11:79545354|79547882	0	0	0	0	0	0	0	0	0.943023	0	0	0
11:79546971|79551134	0	0	0	0	0	0	1.58716	0	0	0	1.16749	0
11:79937673|79942207	0	0.914856	0	0	0	0	0	0	0	0	0	0
11:79943231|79946285	0	0	0	0	0	0	0	0	0.940932	0	0	0
11:79943231|79949075	0	0	0	0	0.616343	0	0	0	0	3.3303	2.18404	0
11:79943231|79957388	0	0	0	0.93306	0	0	0	0	0	0	0	0
11:79945779|79949075	0	0	0	0.628116	0	0	0	0	0	0	0	0
11:79948891|79953654	0	0	0	0	0	0	0.944757	0	0	0	0	0
11:79955611|79957388	0	0	0	0.621695	0	0	0	0	0	0	0	0
11:79955611|79959150	0	0	0	0	0	2.49178	0	0	0	0	0	0
11:79995617|79995809	0	0	7.0028	5.88371	0	4.05555	0	0	0	0	0	0
11:79999057|80010643	0	0	1.69036	0	0	1.11331	0	0	1.56927	0	0	1.41534
11:79999057|80015236	0	0	1.60979	0	0	1.66777	0	0	0	0	0	0
11:80010558|80015236	0	0.613984	0	0	0	0	0	0	0	0	0	0
11:80015143|80019784	0	0	0	0	1.53829	0	0	0	0	0	0	0
11:80015143|80025954	0	0	0	0	0	0	0	0	0.940932	0	0	0
11:80019679|80022269	1.02008	0	2.57052	0	2.28779	0	0	1.443	0	0	3.56975	0
11:80019679|80025001	0	0	0	0	0	0	0	1.80623	0	0	0	0
11:80019679|80025311	0	0	0	0	0	0	0	0	0	0	0.585704	0
11:80019679|80025954	0	0	0	0	0	0	1.57603	0	0	0	0	0
11:80024910|80025954	1.02008	0	1.75544	0	0	0	0	0	1.06037	2.46509	1.79239	0
11:80024910|80029346	1.03755	0	0	0	0	0	0	0	0	0	0	0
11:80025168|80025954	0	1.8015	0	0	0	0	0	0	1.57353	0	0.885628	0
11:80056452|80060185	0	0	0	0	0.616343	0	0	0	0	0	0	0
11:80056452|80064399	4.47529	0	7.76634	2.57834	0	0	0	0	0	1.32808	0	0
11:80059200|80064399	0	0	0	0	0	0	0	0	0	0	0	2.72689
11:80060098|80064399	1.36011	0	0	2.17335	0	0	0	0	0	1.0772	0	0
11:80097953|80103341	0	0	0	3.35813	0	0	0	0	0	0	0	0
11:80106254|80108637	0	0	0	0	0	0	0	0	0	0.665147	0	0
11:80156945|80162260	0	0	0	0.930991	0	0	0	0	0	0	0	0
11:80156945|80165819	0	1.69711	5.18136	6.8704	8.74822	4.7126	1.34173	3.29168	6.74673	0	4.11506	5.32643
11:80156945|80170761	0	2.53782	0	0	0	1.67451	0	0	0	0	0.876591	0
11:80156945|80177274	0	0	0	0	0	0	0	0	1.5906	0	0	0
11:80160163|80165819	0	0	0	0	0.674483	0	0	0	0	0	0	0
11:80162148|80165819	0	0	0.970457	0	1.54883	0	0.823761	0	0	0	1.4712	0
11:80165673|80165819	0	0	0	0	0	0	1.15869	2.76185	0	0	0.738667	0.834184
11:80174088|80177274	4.08402	0	0	0	2.15361	1.99949	3.18089	3.95858	2.19969	1.66231	2.86084	0
11:80220258|80227332	11.1539	7.52535	3.36804	5.53605	0	5.34229	2.54178	0	5.39517	0	0	0
11:80223903|80226116	0	0	0	0	0	0	1.20949	0	0	0	0	1.22563
11:80223903|80227332	28.1696	34.621	25.7816	28.8849	31.9911	37.5178	28.8361	19.4315	45.3225	29.5591	25.3916	39.1358
11:80223903|80234030	0	0	0	0	0	0	0	0	1.71691	0	0	0
11:80233382|80234030	0	0	0.986732	0	0	0	0	0	0	0	0	0
11:80242021|80243490	0	0	0	0	0	1.0031	0	0	0	0	0	0
11:80242021|80246086	0	0	0	0.620661	0	0	0	0	0	0	0	0
11:80246002|80251126	0	0	1.6109	1.11004	0.929212	0	3.00612	0	3.76373	0	0	1.77125
11:80246002|80253086	0	1.83276	0	0	0	0	0	0	0	0	0	0
11:80246667|80248538	0	0	0	0	0	0	0	0	0	0	0.659146	0
11:80248438|80251126	0	4.88753	2.25027	1.29997	0	1.01324	0.629139	0	3.34042	0	0	0
11:80250208|80251126	14.7143	28.5464	15.6381	16.355	21.5665	16.074	18.8468	13.8353	25.16	20.1119	19.8135	22.5836
11:80368528|80373704	0	3.69116	0	0	1.36577	2.63839	0	0	0	0	0	0
11:80368528|80374217	0	1.01338	0	0	0.957399	0	0	0	0	0	0	0
11:80373640|80376883	0	0	0	0	0	0	0	0	0	1.33818	0	0
11:80394286|80395875	0	0	1.92789	0	0	0	0	0	0	0	0	0
11:80394286|80398470	0	0	2.44759	2.63857	2.16198	2.3962	1.63736	0	0	2.39644	3.1854	0
11:80395792|80402711	0	0	0	0	0	0	0	0	0.940932	0	0	0
11:80395792|80403408	0	0	0	0	0	2.86807	0	0	0	0	0	1.06062
11:80395792|80403662	0	0	0	0	1.88038	0	0	0	0	0	0	1.41897
11:80402646|80403662	0	0	0	0	0.927162	0	0	0	0	0	0	0
11:80438251|80445971	0	0	0	0	0	0	0	0	0	0	1.19968	0
11:80445242|80456434	0	0.612995	0	0	0	0	0	0	0	0	0	0
11:80456240|80462671	0	0	0	0	0	0	0	0	0	1.00276	0	0
11:80462611|80465076	0	0	0	0	0	0	0	0	0	0	2.16084	0
11:80637874|80671019	0	0	0	0	0.981116	0	0	0	0	1.03602	0	0
11:82783346|82787828	0	0	0	0	0	0	0	0	0	0	0	1.06658
11:83321939|83324756	0	1.52578	0	0	0	0.998635	0	4.00949	0	0	1.91006	2.76932
11:83324511|83324756	0	2.18122	1.61309	5.74032	1.86048	2.72775	1.89593	0	1.88186	0	1.17341	1.0618
11:83324511|83336462	0	0	0	0	0	0	0	0	0	0	1.75124	0
11:83336766|83346907	1.41882	0	0	0	0	0	0	0	0	0	0	0
11:83481934|83485079	2.72021	0	0	0	1.72618	0	1.25828	0	0	0	0.875618	0.709437
11:83481934|83487413	0	0	1.36817	0	0	0	0	0	0	0	0	0
11:83481934|83489045	0	0	2.35552	0	0	0	0	0	0	0	0	0
11:83484651|83485079	5.96706	7.95946	9.8854	3.31585	3.80974	6.77214	10.8232	4.51307	19.4169	5.07444	8.74981	6.1519
11:83484651|83487413	10.3237	13.9607	14.1173	8.5394	11.2088	21.6367	15.3368	8.24397	13.9438	12.9894	14.6512	11.3845
11:83484651|83489045	0	0	0	0	0	1.33262	0	0	0	0	0	0
11:83484651|83497926	0	0	0	0	0	0.985581	0	0	0	0	0	0
11:83484977|83487413	3.39859	2.11233	3.40886	0	2.27216	2.72157	1.65282	0.811961	2.08453	5.93352	2.0628	0
11:83487223|83487413	2.83007	1.16058	0	2.02188	0	4.50316	0	0	4.65256	0	1.51648	0
11:83497894|83502852	0.681187	0	0	0	0	0	0	0	0	0	0	0
11:83501115|83502852	10.2595	16.4378	11.0867	13.2589	11.8183	13.4776	11.0638	26.333	14.0755	20.1641	13.3317	21.7272
11:83772245|83773992	1.36464	0	0	0	0	0	0	0	0	0	0	0
11:83861716|83864178	0	0	0	0	0	0	0	0	1.57359	0	0	0
11:83861794|83864178	0	0	0	0	0	0	0	0	0	0	0.876591	0
11:83863943|83889184	0	0	0	0	0	0	0	1.7989	0	0.66404	0	0
11:83948445|83949694	7.45581	7.0633	10.8068	11.1085	10.8709	8.91803	13.761	9.41127	11.5841	7.01279	11.5984	7.5794
11:83987913|83994462	0	0	0	0	0	0	0	0	0.628333	0	0	0
11:83994329|84002235	0	0	0	0	0	0	0	0.761692	0.943037	0	0	1.8096
11:84019591|84019953	3.17123	2.43962	7.83885	2.49208	0	6.89301	4.94464	7.55754	4.56883	4.74189	5.89317	2.9351
11:84103053|84110045	0.764336	0	0	0	0	0	0	0	0	0	0	0
11:84164395|84165384	0	0	0	0	0	0.66913	0	0	0	0	0	0
11:84193079|84195687	79.701	102.372	92.3619	91.8904	73.2391	119.541	72.6833	65.254	91.5378	83.3009	73.0752	84.0066
11:84193079|84214290	0	0	0	0	0	0	1.28396	0	0.940932	0	0	0
11:84193079|84215972	0	0	0	0	0	2.38392	2.29051	0	0	0	0	0
11:84195438|84195687	2.04016	5.48498	2.78667	0	2.49623	1.04585	0	1.07862	2.9166	4.2404	0.876591	2.16335
11:84223142|84231761	0	5.09167	2.2492	1.33562	1.53829	1.21811	3.14888	0	3.34038	0	0	0
11:84292891|84346815	1.36124	0	0	0	0	0	0	0	0	0	0	0
11:8443935|8453250	0	0	1.52478	0	0	0	0	0	0	0	0	0
11:84442566|84449187	0	2.44542	6.02939	3.47583	1.9143	2.04114	0	0	2.89191	3.43946	4.75784	1.10665
11:84442566|84455073	0	3.06533	0	0	0	0	0	0	0	0	0	0
11:84442566|84457892	0	1.52679	0	0	0	0	0	0	0	0	0	0
11:84442566|84467544	0	0	0	0.97501	0	1.45821	0	0	0	0	0	0
11:84442566|84473166	0	2.4458	6.28644	0	0	5.12527	0	0	2.8249	6.31285	4.17365	1.7677
11:84445627|84467544	0	0	1.37223	0	0	0	0	0	0	0	0	0
11:84445627|84473166	0	0	0	0	0	2.3118	0	0	3.58056	0	0	0
11:84467461|84471286	0	0	0	0	0	0	1.58665	0	0	0	0	0
11:84467461|84473166	12.3296	11.4271	10.6577	8.73125	6.67149	6.1999	6.48099	5.99213	11.6055	12.1328	11.2445	8.25115
11:8448690|8453250	0	0	0.967157	1.24132	0	0	0.630187	0	0	0	0	1.77375
11:84509659|84510417	0	0	0	0	0	0	1.89698	0	0	0	0	0
11:84509659|84511578	0	0	0	2.55827	0	0	1.13874	1.45648	0	0	0	0
11:8478225|8479665	19.7961	21.4387	31.7896	17.6374	24.4737	12.379	8.49652	14.1715	19.0823	9.52027	20.8668	20.217
11:84836365|84836724	0	0	0	0	0	3.8522	3.14779	0	2.8802	0	0	0
11:84854054|84854380	0	0	1.3458	0	0	0	0	0	0	0	0	0
11:84854054|84862318	0	0	0	1.55165	0	0	0	0	0	0	0	0
11:85017630|85019876	0	0	0	0	2.17125	1.78056	0	1.83444	0	0	0.584718	3.18544
11:85017630|85022905	3.86184	8.96419	3.55243	1.38039	6.09801	15.5977	8.398	3.47577	7.74604	9.02483	3.84312	5.88795
11:85022156|85022905	0.680054	0	0.951425	0	1.34181	2.61973	0	0	1.32192	0.677779	2.33993	1.0618
11:85029061|85032223	0	0	1.28526	0	0	0	0	0	0	0	0	0
11:85039201|85040170	0	0	0.965015	0.62484	0.616343	0	0	0	0	0	0	1.83431
11:85044710|85054049	0	0	0	0	0	0	0	0	0	0.99606	0	0
11:85044710|85059259	0	0	0	0	0	0	0	0	0.629393	0	0	0
11:85055766|85059259	0	0	0	0	0	0	0	0	0	0	0	1.06062
11:85077265|85083894	0	0	0	1.24236	0	4.68903	0	0	0	0	0	0
11:85077265|85104026	0	1.37216	0	0	0	1.52965	0	0	0	0	0	0
11:85100193|85104026	0	0	0	0	0	0	0.630187	0	0	0	0	0
11:8518199|8519570	31.1653	53.4417	49.5805	36.0776	44.3805	25.3153	33.0059	39.791	31.0567	28.7394	45.2234	31.7024
11:8518199|8532509	6.05876	2.18533	3.2665	6.6209	7.09793	4.97501	3.47188	3.60269	4.0571	2.40757	0.584718	4.51276
11:8519123|8532509	0	0	0.649202	0	2.77205	0	0	0	0	0	0	0
11:85194575|85196256	0	0	0	0	0	0.998635	0	0	0	0	0	0
11:8530872|8532509	0	0	0	0.932026	1.01692	0	0	0	0	0	0	0
11:85326864|85327092	0	0	0	0	0	1.99727	0	0	0	0	0	0
11:85326864|85332375	3.07988	3.06606	2.57703	3.41885	7.47441	5.01342	1.64239	1.88783	6.03484	4.02411	0	3.3464
11:85326864|85339796	0	0	0	0	3.16632	0	1.26784	0	1.56822	0	0	0
11:85359625|85371163	0	0	0	0	0	0	0	5.03476	0	0.66404	0	0.748981
11:85365552|85415724	0	0	0	0	0	2.99885	0	0	0	0	0	0
11:85509428|85531943	0	0	0	0	0	1.66772	0	0	0	0	0	0
11:85531793|85536062	0	0	0	0	0	0	0	0	0	0	2.33498	0
11:85531793|85559171	2.82632	0	2.89612	0	0	2.00171	0	0	1.36786	0	3.10387	1.41416
11:85531793|85583994	0	0	3.06711	1.90761	0	0	0	1.7977	1.25667	0.99606	0	0
11:85554190|85559171	0	0	0	0	0	0	0	0	2.19551	1.47549	0	0
11:85554190|85583994	0	0	0	0	0	2.66303	0	0	1.25458	0	0	0
11:85576782|85581238	0	0	0	0	0	0	0	0	0	0	0.583745	0
11:85576782|85583994	8.69887	7.03655	5.83473	1.90398	2.79724	7.58016	10.4623	1.07862	12.6288	4.65722	12.2894	6.36963
11:85581042|85583994	0	0	0	0	0	0	0	0	1.27933	0	0	0
11:86074279|86077969	0	0	0.972687	0	0	0	0	0	0	0	0	0
11:86135259|86148557	0	0	2.92585	0	2.46751	0	0	0	0	0	0	0
11:86143257|86157878	0	0	0	2.17542	0	0	0	0	0	0	0	0
11:86148358|86192988	0	0	0	0	0	0	0	0	0	0	0.583745	0
11:86189732|86192988	0	0	0	0	0	0	0	0	0	0	1.46034	0
11:86278470|86283423	0	1.52476	0	0	0	2.681	0	0	0	0	0	0
11:86282677|86283423	0	0	0	0	0	0	0.630187	0	0	0	0	0
11:86298280|86308912	0	0	0	0	0	0	0.945819	0	0	0	0	0
11:86300650|86301555	0	0	0	0.621695	0	0	0	0	0	0	0	0
11:86303534|86308912	0	0	0	1.02814	0	0	0	0	0	0	1.16749	0
11:86306984|86308912	0	0	1.09145	0	0	0	0	0	0	0	0	0
11:86319348|86346028	0	0	0	0	0	0	0	0	0	0	0	1.77006
11:86327802|86332028	0	0	0	1.24236	0.615317	0	0	0.82876	0	0	0	0
11:86329168|86346028	0	0	0	0	0	0	0	0	0	0	0.610941	0
11:86330988|86332028	0	0	1.60872	0	0	0	0	0	0	0	0	0
11:86331883|86346028	0	0	0	0	0	0	0.629139	0	0	3.65222	0	1.61459
11:86345860|86346028	7.59052	11.2326	9.1017	17.8309	16.082	21.9028	14.7983	0	22.3227	17.0991	13.1751	14.6107
11:86345860|86355508	0	0	0	0	0	0	0	0	0	2.74714	0	0
11:86504266|86512913	0	0	2.01111	0	2.76893	0	0	0	0	0	0	0
11:86504266|86513637	0	1.47873	0	0	0	0	0	0	0	0	0	0
11:86504266|86535460	0	0	1.31306	0	0	0	0	0	0	0	0	0
11:86511589|86534146	0	0	0.996956	0	0	0	0	0	0	0	0	0
11:86517583|86535460	0	5.14422	0	0	3.20369	0	0	0	0	0	0	0
11:86519892|86534146	0	0	0	0	0	0	0	0	0	0	0	1.77251
11:86532772|86534146	1.88619	6.13173	5.49165	4.93385	2.28929	10.6008	7.73373	6.44482	9.24544	9.71562	4.83921	5.45721
11:86532772|86535460	68.5546	77.5384	77.7631	70.4292	67.8849	100.873	76.8284	95.7175	112.76	123.418	96.2602	93.3131
11:86548783|86553004	0	0	0	0	0.926094	0	0	0	0	0	0	0
11:86548783|86561376	0	0	0	0	0	2.95006	0	0	0	0	0	0
11:86602008|86635306	0	0	0	0	0	0	0	0	1.88501	0	0	0
11:86602008|86665878	4.85854	2.13467	0	0	0	0	1.32079	0	1.40985	0	0	0
11:86607176|86665878	0	1.5352	0	0	0	0	0	0	0	0	1.45936	0
11:86630370|86665878	0	0	0	0	0	0	0	0	0	0.863278	0	0
11:86635175|86665878	0	7.74288	10.4234	8.70168	2.66989	8.69311	10.3473	2.84726	8.39106	10.3571	9.68301	0
11:86643498|86665878	2.52673	2.27227	2.57377	4.62089	3.6841	2.90316	3.23182	6.72599	2.30567	3.65554	4.15495	1.41416
11:86643502|86665878	2.04956	0	0	0	0	0	0.943708	0	0	0	0	0
11:86661123|86665878	10.0386	17.0434	19.0657	12.5559	13.467	11.9273	23.4066	12.0054	19.4942	25.1464	19.5832	12.4492
11:86663483|86665878	0	2.31024	0	0	2.15669	0	0.944757	0	0	0	0	0
11:86708950|86711575	0	0	0	0	0	0	0	0	0	0	0	1.41653
11:86726255|86730384	0	0	0	0	0	0	0	0	0	0.66404	0	0
11:86730211|86732666	0	0	0	0	0	0	0	0	0	0	1.286	0
11:86732505|86733844	0	0	0	3.25508	4.31134	0	0	0	0	2.7782	2.37989	0
11:86733576|86737278	0	0	0	0	0	0	2.51655	0	0	0	0	0
11:86789167|86793261	0	0	0	0	0	3.27636	0	0	0	0	0	0
11:87041788|87059560	0	0	0	0	0	1.33373	0	0	0	0	0	0
11:87056792|87059560	0	0	0	0	0	2.89974	0	0	0	0	0	0
11:87140485|87143214	0	0	2.15663	0	0	0	0	0	0	0	0	0
11:87143127|87149363	0	4.44664	0	0.943572	0	0	0	0	0	0	1.76011	1.7677
11:87145464|87147057	1.73714	3.54884	2.31604	0	0.667786	0.665756	0	0	0	0	2.62685	0
11:87145464|87149363	0	0	0	0	0	0	1.60343	2.53135	0	0	2.44661	0
11:87145464|87163869	0	0	0	1.86198	0	0	0	0	0	0	0	0
11:87145464|87167516	0	0	0	0.626951	0	0	0	0	0	0	0	0
11:87146934|87149363	4.93814	0	2.39861	0.825274	3.14479	4.20216	6.12927	0	3.52658	0	1.19269	7.46433
11:87159821|87163869	0	0	0	2.93264	2.76906	0	0	0	0	0	0	0
11:87159821|87167516	0	0	0	0	0	0	0	0	0	0	4.38591	0.791118
11:87163819|87167516	0	0	0	0	0	0	0	0	0	0	0	1.45273
11:87182421|87190159	0	0	0	0	0	0	1.2753	0	0	0	0	0
11:87184884|87186515	5.11476	4.82541	4.63593	5.95855	10.5011	6.13807	4.56756	4.9818	10.1797	5.37395	6.75106	3.22657
11:87184886|87186515	0	0	0	0	1.23166	0	0	0	0	0	0	0
11:87388248|87397757	0	0	0	0	0	0	0.944757	0	0	0	0	0
11:87474404|87499662	0	0	0	0	0	0	0	0	0.943023	0	0	0
11:87513942|87514861	0	0	0	0	0	0	0	0	0.627288	0	0	0
11:87593389|87598945	0	1.22184	0	0	0	0	0	0	0	0	0	0
11:87598863|87601172	0	0	1.28526	0	0	0	0	0	0	0	0	0
11:87631592|87638244	0	0	1.28526	0	0	0	0	0	0	0	0	0
11:87727150|87728130	0	0	0.98045	0	0.922976	0	0	0	0	1.00279	0	0
11:88073057|88076374	0	4.87447	1.3448	2.79297	0.656955	2.01567	3.57856	0	5.47806	7.85473	7.86259	0
11:88073057|88078555	0	0	0.642629	1.87538	1.22691	0	0	0	5.09896	0	0	0
11:88169565|88170174	3.11104	0	0	1.55372	0	0	0	0	0	0	0	0
11:88169565|88177397	0	0	0	0	0	0	0.649076	0	0	0	0	0
11:88712438|88717745	0	0	0	0	1.16562	0	0	0	0	0	0	0
11:88832308|88833215	0	0	5.17525	6.448	0	0	0	0	0	0	9.11848	8.28833
11:88929165|88930345	0	0	0	2.79401	1.53829	0	0	0	0	0	0	0.70708
11:88933448|88935951	0	0	0	0	0	0	0	0	0	0	0	1.06901
11:88934578|88935951	0	1.22184	0	3.10434	3.24346	0	0	0	0	0	0	1.79314
11:88982289|88985086	0	0	0	0	0	0	2.22636	0	0	0	0	0
11:88982289|88988067	0	0	0	0	0	0	1.88742	0	0	0	0	0
11:89004729|89010973	0	0	0	2.23227	0	0	0	0	0	0	0	1.7677
11:89004729|89013538	0	0	0	0	0	2.33126	0	0	0	0	0	0
11:89009119|89010973	0.688079	0	0	6.78748	2.86367	0.67024	2.43142	0	0	4.72585	0.620774	1.24632
11:89009119|89013538	0	0	0	0	0	0	1.57285	0	0	0	0.876591	0
11:89041448|89049900	0	0	0	0	2.1261	0	0	0	0	0	3.04879	0
11:89042162|89049900	3.43587	6.72233	3.90037	0	10.5534	10.0036	0.677165	3.70262	9.36832	0	4.44341	5.27904
11:90257520|90267581	0	0	0	0	2.15875	0	0	0	0	0	0	0
11:90571722|90594841	1.70583	0	0	0	0	0	0.945805	0	0	0	0	0
11:90656351|90661889	0	0	0	0.930991	0	0	0	0	0	0	0	0
11:93905159|93910406	0	0	0	0	0	0	1.89058	0	0	0	0	0
11:93905159|93912458	2.70864	15.5718	5.82439	5.15965	9.11444	4.14959	10.0938	9.35772	3.76688	2.37594	4.70469	4.24366
11:93905159|93918947	0	0	0	0	0	0	0	0	2.51126	0	0	0
11:93905159|93921484	0	0	0	0	0	0	0	0	0	2.19917	0	0
11:93905159|93933958	0	0	0	0	0	0	0	0	5.05344	0	0	0
11:93905163|93912458	1.31801	1.82971	1.60873	3.4641	2.31624	4.17689	3.46236	2.51798	1.3437	0.939422	2.04311	1.89257
11:93905163|93933958	0	0	0	0	0	0	0	0	0	1.00394	0	0
11:93908804|93910406	2.38019	0	0	0	0	0	1.32069	0	0	0	0	0
11:93908804|93912458	0.681187	0	0	0	0	0	0	0	0	0	0	0
11:94013623|94024997	0	1.52476	0	0	0	0	0	0	0	0	0	0
11:94013623|94036670	0	1.53289	0	0	0	0	2.12409	0	0	0	1.84781	0
11:94013623|94048558	0	4.02387	5.32895	4.11119	0	5.85158	5.62357	0.772828	0	8.67328	3.71886	3.06219
11:94024917|94048558	0	8.49479	5.46556	6.37716	0	8.86852	5.36997	2.27742	0	4.85245	3.50839	10.0305
11:94036600|94048558	15.8709	22.2799	17.0323	19.1212	11.5975	14.3186	20.039	12.0501	29.709	20.9215	16.8022	12.7235
11:94043572|94048558	3.48241	6.61642	3.94212	5.43137	8.96524	6.10347	10.5047	6.59386	5.65877	10.2238	10.2488	6.48111
11:94043572|94071686	0	0	1.62861	0	0	1.33151	0	0	0	0	0	0
11:94067893|94069035	0	0	0	0	0	0	0	0	0	2.6699	0	0
11:94067893|94071686	2.4356	0	7.53459	6.21497	0.746611	5.3544	3.28742	1.07862	1.57776	4.26159	3.86529	3.19163
11:94068936|94071686	0	0	0	1.55794	0	0	0	0	0	0	0	0
11:94081340|94086377	0	0	0	0	0	0	0	0	0	0	0	0.70708
11:94081340|94114349	0	0	0	0	0	0	0	0	0	0	0.884658	0
11:94097218|94099152	0	1.52891	1.97739	0	3.07761	0	1.97038	1.7989	2.55895	1.66121	1.17141	0
11:94097218|94102158	0	0	0.965015	0	0	0	0	0	0	0	0	0
11:94097218|94106782	0	0	0	0	0	0	3.78654	1.50264	0	0	0.878576	0
11:94097218|94108626	0	0	0	0	0	0	0	0	0	0	0.583745	1.23593
11:94097681|94102158	0	0	0	0	0	0	0	0	0	0	0.954621	0
11:94301505|94309691	0	0	0.965015	0.72203	0	1.66439	0	0	0	0	0	0.70708
11:94303842|94309691	0	0	0.715774	0	0	0	0	0	0	0	0	0
11:94569941|94573228	0	0	0	0	0	1.67114	0	0	0	0	0	0
11:95286330|95294645	0	1.85367	0	1.86302	1.94367	0	0	1.32043	2.23633	4.89177	3.55084	0
11:95289772|95294645	2.19153	0	5.31052	9.27877	5.24704	8.58582	6.78655	9.1428	8.38776	4.00689	5.9164	3.81711
11:95303133|95306196	0	0.610921	0	0	0	0	0	0	0	0	0	0
11:95389080|95390678	0	1.22595	2.90825	0	0	0	0	0	0	0	0	0
11:95470522|95474612	0	1.85562	0	0	0.615317	0	0	0	0	0	0	0
11:95749000|95754055	0	0	0	1.24339	0	0.66913	0.970865	0	0	0	0	0
11:96770639|96773222	0	0	1.4348	0	0	0	0	0	0	0	0	0
11:96800771|96802822	0	1.26108	0	0	0	0	0	0	0	0	0	0
11:97212280|97213187	0	0	0	0	0	0	0.629139	0	0	0	3.45911	0
11:97212280|97226868	0	0	0	0	0	0	1.26039	0	0	0	0	0
11:97213771|97238258	0	0	0	0	0	0	0	0	0	0	1.16846	0
11:97222951|97226868	0	0	0	3.82405	0	0	0	3.76007	0	0	0.583745	0
11:97224659|97226868	0	0	0	0	0	2.66303	0	0	0	0	0	0
11:97226729|97236169	0	0	0	0	0	0	0	0	0	0.665147	0	0
11:97226729|97238258	0	0	0	0	0	1.44066	0	0	0	0	0	0
11:97229830|97236169	0	0	0	0	0	0	0	3.95978	0	0	2.64014	0
11:97229830|97238258	2.47166	1.57787	2.31099	0	0.943905	0.999744	0	3.2419	2.82384	2.31454	0	2.8295
11:97231889|97236169	0	0	0	0	0	4.26722	0	4.48373	1.89922	0	0	0
11:97231889|97236221	0	0	0	0	0	0	0	0	0.643107	0	0	0
11:97231889|97238258	5.84158	7.55041	1.74298	6.50004	4.6294	1.82652	0	1.56578	0	1.49272	0	0
11:97235055|97238258	0	1.15088	0	0	0	0	0	0	0	0	0	0
11:97238094|97258351	0	0	0	0	0	0	0	0	0	0	1.47517	0
11:97240929|97244535	0	0	0	0	0	0	0	0	0	0	0.584718	0
11:97244428|97258351	0	1.36759	0	0	0	0	0	0	0	0	0	0
11:97248202|97258351	0	0	1.60872	0	0	0	0	0	0	0	0	0
11:97377936|97378711	9.91706	12.5781	7.81878	5.82104	7.79418	8.6037	5.963	4.20136	8.20083	7.63908	9.2338	5.57175
11:97389112|97389716	0	0	0	0	0	0	0	0	0	0	1.75124	0
11:97670253|97672592	0	0	0	0	0	0	0	0	0	0	0	1.77493
11:97722362|97732755	1.70242	0	0	0	0	0	0	0	0	0	0.877564	0
11:97726705|97732755	3.06634	1.21981	3.70767	3.99957	4.92254	5.95861	5.97891	7.35282	6.84068	4.47576	4.15191	2.89513
11:97806825|97824949	0	0	0	0	0	0	0	0	0	0	2.17674	0
11:97815698|97824949	0	0	0	0	0	1.46361	0	0	0	0	1.20372	0
11:97863359|97868669	0	0	0	0	0	0	2.8468	0	0	0	0	0
11:97877957|97879588	10.9335	13.044	10.0365	1.60007	11.1439	8.56115	5.48249	3.61477	13.3708	6.43358	6.80621	9.56768
11:98179112|98183920	0	1.5464	0	0	0	0	0	0	0	0	0	0
11:98219074|98224631	2.04592	1.52578	0	0.93306	1.848	2.33696	0	0	0.627288	0.66404	0	0.708258
11:98219074|98231085	2.38019	2.17849	0	0	0	0	0	2.15724	0	0	0	0
11:98230113|98231085	0	0.914856	0	0	0	0	0	0	1.32441	0	0	0
11:98230113|98236782	3.07771	0	0.965015	0	1.58566	2.99701	1.74242	0	0	0	0.583745	0
11:98263470|98267858	111.586	116.415	136.983	107.961	112.323	137.131	94.257	82.1992	136.953	115.98	132.051	114.799
11:98263474|98267858	0	1.35341	0	0	0	0	0	0	1.88186	1.99544	0	0.720656
11:98372070|98373570	2.38019	4.34969	0	8.07066	6.21674	4.02014	1.57285	1.7989	0.633704	1.32808	4.38004	0
11:98693383|98694293	0	0	0	4.65806	1.36542	0	0	0	0	0.99606	0.878576	0
11:98705522|98706916	0	1.90951	0	0	0	0	0	0	0	0	0	0
11:98821431|98823399	0	2.80137	0	2.35005	0	0	1.88951	0	0	0	0.875618	0
11:98910187|98910777	0	2.15257	1.08558	1.55165	3.22297	0	0	0	1.59655	6.84671	1.78039	0
11:98996729|98997919	0	1.70597	0	3.41365	5.2913	1.34394	0	0	0	0	0	2.17331
11:98996729|99001441	0	0	0	0	0	1.66887	0	0	0	0	0	0
11:99000768|99001441	0	0	0	0	2.00696	1.6655	0	0	0	0	0	0
11:99009230|99011063	0	0	0	0	0	0.998635	0	0	0	1.33031	0	0
11:99048226|99049228	0	0	0	0	0	1.99727	0	0	0	0	0	0
12:100149817|100151334	1.10068	2.44267	3.23154	0.95066	0	2.37091	0	2.15724	7.36226	0.997167	0	0
12:100332579|100376248	0	0	1.02821	0	0	0	0	0	0	0	0	0
12:100347936|100376248	0	0	1.75608	0	0	0	0	0	0	0	0	0
12:100446860|100466310	2.25985	2.27774	3.61854	2.05579	0.616343	0	0	0	5.60925	3.14994	5.5881	1.77006
12:100446860|100495440	1.86133	0	1.60657	2.2792	0	0	0	3.77368	2.51342	0.66404	2.36101	3.5354
12:100466180|100495440	0	0	0	0	0	0	0	0	0	0.99606	0	0
12:100495272|100500230	0	0	0	2.8285	1.23063	0	2.26991	3.99616	2.5102	0	3.2722	0
12:100595815|100619641	0	0	1.3105	0	1.53932	1.87941	0	0	0	0	0	1.06062
12:100615997|100619641	0	10.5738	13.5096	7.54335	5.385	4.84594	3.13742	0	13.9657	8.24645	8.14959	3.18186
12:100654047|100654489	0	0	0	0	0	0	0	0	0	0	3.53821	0
12:100654271|100678589	0	0	0	1.86198	0	0	0	0	0	0	0	1.58224
12:101043443|101044659	0	0	0	0.930991	1.90101	2.13257	1.90454	2.88116	2.21076	1.99212	4.2191	2.47478
12:101043443|101045681	0	0	0	0	0	0	0	0	1.46877	0	0	0
12:101043443|101049818	0	0	0	0	0	3.0527	1.73328	0	1.58529	0	0	0
12:101044490|101045681	0	0	0	0.935213	0	0	0	0	0	0	0	0
12:101044490|101049818	0	0	0.642629	0	0	0	0	0	0	0	0	0
12:101051334|101051662	0	0	0	0	0	0	0	0	0	0	2.04311	0
12:101055530|101058941	0	0	0.6437	0	0	0	0.630187	0	0	0	0	0
12:101665553|101694673	11.2319	7.67166	5.84733	4.90575	3.59117	3.99565	6.33679	0	1.67369	0	3.09784	2.90618
12:101678514|101693206	0	0	1.60764	0	0	0	0	0	0	0	0	0
12:101678514|101694673	3.97349	7.16332	3.31245	3.97738	8.15896	9.09865	1.30456	0	5.45855	0	2.32953	3.89832
12:101678514|101709536	0	0	0	0	0	0.665756	0	0	0	0	0	0
12:101688960|101694673	3.59301	4.34155	4.41251	3.46708	3.98648	8.01749	8.80256	4.26441	11.6769	5.42261	6.05108	3.59456
12:101693115|101694673	0	0	1.02961	0	0	0	0	0	1.29437	1.6827	0	0
12:101862593|101878929	0	0	0	0	0	0	0	1.07982	0	0	0	0
12:101889705|101899103	0	0	4.56068	0	0	0	0	0	0	0	0	1.41892
12:101895651|101899103	0	0	0	0	0.922976	0	0	0	0	0	0	0
12:101932968|101945919	0	0	0	0	0.922976	0	0	0	0	0	0	0
12:101932968|101948439	0	4.51584	0	0	0	0	0	0	0	0	0	3.54139
12:101937337|101948439	1.70931	1.21981	1.61741	0	0	0	3.27707	0	3.17312	0	0	1.47961
12:101942117|101945919	0	0	0	0	0	0	0	0	0	0.791974	0	0
12:101942117|101948439	4.58559	3.17408	4.53957	4.47133	0	0	3.59063	0	2.56494	3.37246	1.17241	1.06299
12:101945400|101945919	0.8434	0	0.811401	0	0	1.49283	0	0	0	2.0439	0	0
12:101945400|101948439	5.64831	4.8823	8.85232	4.68252	0	9.55567	7.12458	0	8.92587	12.2504	4.09112	5.29859
12:102395644|102398383	0	0	0	0	0.662288	0	0	0	0	0	0	0
12:102403427|102423755	0	0	0	0	0	0	0	0	0	2.32414	0	0
12:102405796|102423755	0	0	0	1.2434	0	0	0	0	0	0	0	0
12:102413465|102423755	0	0	4.60236	0	2.88775	0	1.38485	0	3.86335	0	0	1.7677
12:102471998|102474773	0	0	0	1.24132	0	0	0	0	0	0	0	0
12:102474546|102484574	0	1.83786	0	0	0	0	0	0	0	0	0	0
12:102474546|102487248	0	0	0	0	0	0	0.956974	0	0	0	0	0
12:102479598|102484574	1.82536	3.37318	2.52906	2.40416	0	0	0	0	3.9258	3.57718	0	4.86198
12:102484404|102493859	0	0	1.28526	0	0	0	0	0	0	0	0	0
12:102492013|102493859	0	0	0	1.96915	0	0	0	0	0	0	0	0
12:102606089|102623425	0	0	0.762392	0	0	0	0	0	0	0	0	0
12:102761371|102761981	0	0	0	0	7.81401	0	4.5339	0	0	6.36053	0	0
12:102807900|102812843	9.86181	13.4555	10.8384	11.2553	9.902	9.04732	4.25181	7.89626	5.65143	11.0194	0	7.81171
12:102811120|102812843	0	0	0	2.13227	0	0	0	0	0	0	0	0
12:104083613|104085911	0	0	0	0	0	0	0	0	0.941977	0	0	0
12:104712995|104714906	0	1.24144	0	0	0	0	0	0	0	0	0	0
12:104967882|104969373	0	0	0	0	0	0	0	0	0	0	1.17738	0.708258
12:105648313|105651523	0	0	0	1.01548	0	1.67456	0	1.51816	0	0	0	0
12:105671476|105675013	0	0	0	0	0	1.10648	0	0	0	0	0	0
12:105799651|105799824	0	0	0	0	0	0	0	2.17907	0	0	0	0
12:105799651|105800750	3.55243	2.48804	5.32195	3.90415	1.40191	6.95942	4.32584	7.59018	5.92649	3.58875	8.69822	5.12843
12:105799651|105805008	0	0	1.74024	5.54405	0	2.38762	0	7.54484	0	2.10773	1.70496	0
12:105799651|105807218	1.36011	0	1.05035	2.57623	2.72285	1.61625	0	0	4.10724	0	1.75124	0
12:105799651|105812394	0	0	0	0	1.54244	0	0	0	0	0	0	0
12:105799651|105813282	0	0	0	0	0	1.66663	1.36142	1.7977	0.692526	4.85519	0	0
12:105799651|105818899	0	0	0	0	0	0	0	0	0	1.32919	1.17138	0
12:105799651|105820450	6.08161	0	2.14075	0	0	2.46379	4.68313	2.51798	4.72478	0	0.997037	2.04133
12:105799651|105823677	0	0	2.57052	0	0	0	0	0	1.91646	0	1.23306	0
12:105818356|105820450	0	0.914856	0	0	0	0	0	0	0.628333	0	1.45936	0
12:105818356|105829277	0	0	0	0	0	0	0	0	0	0	1.45936	0
12:105826944|105829277	4.86472	2.13568	2.03325	0	4.61488	3.83569	2.41313	7.38152	6.48749	0	6.28897	0
12:106036540|106042892	0	4.72241	4.41311	4.7329	0	0	5.26664	0	3.70096	0	0	0
12:106036540|106051004	0	0	0	0	0	0	0.630187	0	0	0	0	0
12:106036540|106062808	0	0	0	0.952574	0	0	0	0	0	0	0	0
12:106057843|106062808	0	0	0	0	0	0	0	0	0	0	0	1.41769
12:107989465|107989827	0	0	0	0.933074	0	0	0	0	0	0	1.04419	0
12:107989465|107989830	0	0.972311	1.28633	0	0.922976	0	0	0.720278	0	0	1.75124	0
12:108157754|108158348	0	0	0.6437	0	0	0	0	0	0	1.99323	0	0
12:108157754|108160381	0	2.07062	1.28526	1.40822	0	1.33151	0	1.43816	1.70667	2.06116	1.7007	1.46201
12:108157754|108165172	11.527	17.9961	16.539	13.3036	14.3674	17.1105	14.2422	15.8784	18.1489	12.8842	8.7136	16.8078
12:108534654|108536322	0	0.916889	0	0	0	0	0	0	0	0	0	0
12:108648315|108653099	0	0	0	0	0	0	1.57285	0	0	0	1.909	0
12:108806479|108812979	0	0	0	0.695462	0	0	0	0	0	0	0	1.41652
12:109734563|109737807	0	0	0	0	2.16396	0	0	0	0	0	0	0
12:110465849|110522690	0	0	0	0	0	0	0	0	1.70996	0	0	0
12:110522491|110570768	0	1.22184	0	0	0	0	0	0	0	0	0	0
12:110544075|110554896	3.5372	1.64227	2.85638	0	0	4.99317	0	1.07982	1.88291	0	3.0091	0
12:110544075|110561468	0	0	0	0	0	0	0	0	0	0	1.10842	0
12:110545595|110554896	0	2.94523	0	0	0	0	0	0	0	0	0	0
12:110545595|110561468	0.806791	1.68232	0	0	2.78473	0	0	0	0	0	0	0.7167
12:110561298|110570768	0	0	0	0	0	0	0	0.71908	0.627288	0	0	0
12:110567728|110570768	0	0	0	0	0	0	0	0.811961	0	0	0	1.41416
12:110567728|110574861	0	0	0	0	0	0	0	0	0	2.66062	0	0
12:110651491|110652194	2.38817	0.915873	3.68356	0.938534	1.54769	2.12024	6.96227	1.81497	1.25562	4.90256	7.13896	5.51093
12:110779296|110779890	0	0	0	0	2.43459	0	0	0	2.2804	2.34433	1.75124	0
12:110855000|110855872	0	0	0	0	0	0	0.629139	0	0	0	0	0
12:110860796|110865005	0	2.1367	0	0	0	0	0	0	0	0	0	0
12:110896087|110914778	0	2.54804	0	0	0	0	0	0	0.940932	0	0	0
12:110896087|110915478	0.680054	0	1.93665	0.930991	0	0.741612	3.64016	1.07862	0	3.10416	2.12713	0
12:110896087|110919026	0	0	1.03816	0	0	2.11318	0	1.07862	0	3.1239	0	0
12:110896087|110939937	0	0	0	0	0	0	0	0	0	0.998274	0	0
12:110914650|110919026	0	0	0	0	0	0	0	0.73892	0	0	0	0
12:111081724|111097616	0	0	0	0	0	0	0	0	2.51973	0	0	0
12:111081724|111100038	0	2.3119	0	0	0	1.49658	0	0	1.25458	1.66231	0	0
12:111081724|111103805	0	0.609904	1.6109	0	0	0	0	0	0	2.71867	0	0
12:111093081|111097616	0	0	0	0.620661	0	0	0	4.03144	0	0	0	0
12:111093081|111100038	0.680054	0.661912	0	0	0	0	0	3.26561	3.29712	0	2.08079	1.49749
12:111093081|111103805	0	0	0	0.935171	0	0	0	0	0	0	0	1.7677
12:111097455|111100038	3.10739	2.13467	2.37046	2.0079	1.2671	2.13872	0	4.87503	1.25995	2.95516	2.44984	0
12:111097455|111101708	0	0	0	0	0	0	0	0	0.941977	0	0	1.0642
12:111219811|111222397	2.39672	4.09486	5.28941	2.47203	4.42278	3.60001	3.28111	4.35271	5.69979	5.24312	7.93318	2.18594
[truncated: 14,448 more rows]
